# Supplementary material for: Automation and machine learning drive rapid optimization of isoprenol production in Pseudomonas putida
Source: Research Square preprint supplement (doi:10.21203/rs.3.rs-6846062/v1), 2025-06-16
Supplement: Supplementary file 1 [file a441edf647d99a820e683266.docx]

**Supplementary Information**

Automation and machine learning drive rapid optimization of isoprenol production in *Pseudomonas putida*

David N. Carruthers†,1,2, Patrick C. Kinnunen†,1,2, Yuerong Li2,3, Yan Chen1,2, Jennifer W. Gin1,2, Ian S. Yunus1,2, William R. Galliard2,4, Stephen Tan1,2, Paul D. Adams2,5,6, Anup K. Singh2,3, Jess Sustarich2,4, Christopher J. Petzold1,2, Aindrila Mukhopadhyay1,2, Hector Garcia Martin1,2,5*, Taek Soon Lee1,2,*

1Biological Systems & Engineering Division, Lawrence Berkeley National Laboratory, Berkeley, CA, USA

2Joint BioEnergy Institute, 5885 Hollis Street, Emeryville, CA, USA

3Lawrence Livermore National Laboratory, Livermore, CA, USA

4Sandia National Laboratories, Livermore, CA, USA

5Molecular Biophysics and Integrated Bioimaging Division, Lawrence Berkeley National Laboratory, Berkeley, CA, USA

6Department of Bioengineering, University of California Berkeley, CA, USA

†Equal Contribution

*Corresponding Authors, Joint BioEnergy Institute, 5885 Hollis Street, Emeryville, CA 94608, USA.

E-mail addresses: tslee@lbl.gov (T. S. Lee). Tel: +1-510-495-2470. Fax: +1-510-495-2629; [hgmartin@lbl.gov](mailto:hgmartin@lbl.gov) (H. G. Martin). Tel: +1-510-495-2505. Fax: +1-510-486-4252.

**Github Repository:** <https://github.com/JBEI/Isoprenol_CRISPRi>

# **Table of Contents:**

**Table S1:** List of gene targets from this study by locus name, protein name, source (FluxRETAP vs. heuristics), presence in RbTnSeq library, isoprenol titer, relative dCas9 and POI expression, and usage in DBTL cycles.

# **Fig. S1:** A thorough breakdown of DBTL cycles with a DBT timeline

**Fig. S2:** Liquid handling movements performed by automated laboratory equipment and number of sgRNA units per cycle.

**Fig. S3:** Dispensing of plasmid and competent cells into the electroporation plate

**Fig. S4:** QTrays of triplicate transformation using the HTME

**Fig. S5:** Modes of CRISPRi failure across DBTL cycles

**Fig. S6:** Parity plot of the full and cross-validated ART models throughout the pipeline for predicted and observed isoprenol titers (mg/L)

**Fig. S7**: Heatmaps of relevant pathways among best performing sgRNAs compared to the non-target control strain

**Fig. S8**: Heatmap of significantly changed proteins present in all 25 best performing CRISPRi strain

**Fig. S9:** Comparison of CRISPRi strains with their KO counterparts expressing non-target or KO sgRNAs

**Fig. S10:** Proteomics and production analysis of potential PP_0815 off-targets

**Fig. S11:** Investigation of potential PP_0815 sgRNA off-targets and the impact of their downregulation on isoprenol titer

# **Fig. S12:** Overexpression of genes (PP_2971-74 and PP_2208-09) that are highly expressed in high titer isoprenol strains

**Fig. S13:** Spearman rank correlation coefficients of the 50 most abundant proteins and isoprenol titer in DBTL0

**Table S2:** sgRNA targets selected to investigate PP_0815 off-target effects

**Table S3:** List of oligonucleotides used in this study

**Table S4:** List of plasmids used in this study outside of DBTL1-6

**Table S5**: List of CRISPRi arrays built during cycles DBTL1-6

**Table S6:** List of *Pseudomonas putida* strains constructed in this study

**Table S7:** ModelParamsTable; all parameters shown are ART defaults and any other parameters are sklearn/TPOT defaults.

**Table S8:** Specific settings for selecting sgRNA combinations in each cycle

**Table S9:** Cpf1-mediated ssDNA recombineering for gene knockouts in *P. putida*

# **Table S1:** List of gene targets from this study by locus name, protein name, source, presence in RbTnSeq library, isoprenol titer, relative dCas9 and POI expression, and usage in DBTL cycles.

| **Locus number** | **Protein name** | **Source (Flux-**  **RETAP or Heuristic)** [**1**](https://sciwheel.com/work/citation?ids=17798601&pre=&suf=&sa=0) | **RbTn-**  **Seq Data?** | **Mean isoprenol titer (mg/L)** | **dCas9/**  **control** | **POI/**  **control** | **Passed DBTL0 filter?** | **Used after DBTL2/3?** |
| --- | --- | --- | --- | --- | --- | --- | --- | --- |
| PP_0001 | Probable chromosome-partitioning protein ParB | FR | N | 58.03 | 1.04 | 0.08 | FALSE | FALSE |
| PP_0103 | Cytochrome c oxidase subunit 2 (EC 7.1.1.9) | FR | N | 183.52 | 0.2 |  | FALSE | FALSE |
| PP_0104 | Cytochrome c oxidase subunit 1 (EC 7.1.1.9) | FR | N | 130.41 | 1.11 |  | FALSE | FALSE |
| PP_0105 | Cytochrome c oxidase assembly protein CtaG | FR | N | 144.84 | 0.96 |  | FALSE | FALSE |
| PP_0106 | cytochrome-c oxidase (EC 7.1.1.9) (Cytochrome aa3 subunit 3) (Cytochrome c oxidase polypeptide III) | FR | N | 125.03 | 1.09 |  | FALSE | FALSE |
| PP_0168 | Surface adhesion protein | H | N | 196.29 | 1.13 | 0.03 | TRUE | FALSE |
| PP_0225 | Sulfur compound ABC transporter-ATP-binding subunit | FR | N | 119.72 | 1.79 |  | FALSE | FALSE |
| PP_0226 | Sulfur compound ABC transporter-permease subunit | FR | N | 139.64 | 1.13 | 0.06 | TRUE | FALSE |
| PP_0277 | Lipoprotein | H | Y | 126.66 | 0.92 |  | FALSE | FALSE |
| PP_0338 | Acetyltransferase component of pyruvate dehydrogenase complex (EC 2.3.1.12) | H | Y | 211.49 | 0.02 | 0.82 | FALSE | FALSE |
| PP_0362 | Biotin synthase (EC 2.8.1.6) | H | N | 215.79 | 0.03 |  | FALSE | FALSE |
| PP_0368 | Acyl-CoA dehydrogenase | H | N | 236.68 | 0.94 | 0.03 | TRUE | TRUE |
| PP_0437 | Bifunctional ligase/repressor BirA (Biotin operon repressor) (Biotin--[acetyl-CoA-carboxylase] ligase) (EC 6.3.4.15) (Biotin--protein ligase) (Biotin-[acetyl-CoA carboxylase] synthetase) | H | Y | 225.59 | 0.85 | 0.04 | TRUE | TRUE |
| PP_0528 | Farnesyl diphosphate synthase (EC 2.5.1.1, EC 2.5.1.10) | H | Y | 393.7 | 0.89 | 0.14 | TRUE | TRUE |
| PP_0548 | Flavin prenyltransferase UbiX (EC 2.5.1.129) | H | Y | 304.89 | 0.95 |  | FALSE | FALSE |
| PP_0582 | Thiolase family protein | H | N | 165.48 | 0.68 | 0.62 | FALSE | FALSE |
| PP_0597 | Methylmalonate-semialdehyde dehydrogenase (EC 1.2.1.27) | H | N | 163.8 | 1.11 | 0.02 | TRUE | FALSE |
| PP_0654 | Probable malate dehydrogenase (EC 1.1.1.37) | H | N | 112.83 | 0.83 | 0.2 | TRUE | FALSE |
| PP_0658 | Homocysteine S-methyltransferase family protein | FR | N | 130.08 | 0.97 | 0.01 | TRUE | FALSE |
| PP_0691 | Glutamate 5-kinase (EC 2.7.2.11) (Gamma-glutamyl kinase) (GK) | FR | N | 155.04 | 0.06 | 0.96 | FALSE | FALSE |
| PP_0751 | Probable malate:quinone oxidoreductase 1 (EC 1.1.5.4) (MQO 1) (Malate dehydrogenase [quinone] 1) | H | Y | 211.03 | 1.13 | 0.04 | TRUE | TRUE |
| PP_0774 | Phosphate acetyltransferase (EC 2.3.1.8) (Phosphotransacetylase) | H | N | 142.33 | 0.49 | 0.08 | TRUE | FALSE |
| PP_0806 | Surface adhesion protein | H | N | 212.08 | 1 |  | FALSE | FALSE |
| PP_0812 | Ubiquinol oxidase subunit 2 | FR | Y | 244.11 | 0.68 | 0.24 | TRUE | TRUE |
| PP_0813 | Cytochrome bo(3) ubiquinol oxidase subunit 1 (EC 7.1.1.3) (Cytochrome o ubiquinol oxidase subunit 1) (Oxidase bo(3) subunit 1) (Ubiquinol oxidase polypeptide I) (Ubiquinol oxidase subunit 1) | FR | Y | 267.8 | 0.91 | 0.17 | TRUE | TRUE |
| PP_0814 | Cytochrome bo(3) ubiquinol oxidase subunit 3 (Cytochrome o ubiquinol oxidase subunit 3) (Oxidase bo(3) subunit 3) (Ubiquinol oxidase polypeptide III) (Ubiquinol oxidase subunit 3) | FR | Y | 312.4 | 0.03 |  | TRUE | TRUE |
| PP_0815 | Cytochrome bo(3) ubiquinol oxidase subunit 4 (Cytochrome o ubiquinol oxidase subunit 4) (Oxidase bo(3) subunit 4) (Ubiquinol oxidase polypeptide IV) (Ubiquinol oxidase subunit 4) | FR | Y | 258.98 | 0.36 |  | TRUE | TRUE |
| PP_0897 | Fumarate hydratase class I (EC 4.2.1.2) | H | Y | 95.12 | 0.25 | 0.63 | TRUE | FALSE |
| PP_0944 | Fumarate hydratase class II (Fumarase C) (EC 4.2.1.2) (Aerobic fumarase) (Iron-independent fumarase) | H | N | 97.99 | 0.74 | 0.69 | TRUE | FALSE |
| PP_0999 | Carbamate kinase | FR | N | 148.3 | 0.58 | 0.07 | TRUE | FALSE |
| PP_1023 | 6-phosphogluconolactonase (6PGL) (EC 3.1.1.31) | FR | Y | 132.64 | 0.07 | 0.9 | FALSE | FALSE |
| PP_1031 | Inosine-5'-monophosphate dehydrogenase (IMP dehydrogenase) (IMPD) (IMPDH) (EC 1.1.1.205) | FR | Y | 119.89 | 0.79 | 0.89 | FALSE | FALSE |
| PP_1157 | Acetolactate synthase | H | Y | 167.83 | 0.94 |  | FALSE | FALSE |
| PP_1240 | Phosphoribosylaminoimidazole-succinocarboxamide synthase (EC 6.3.2.6) (SAICAR synthetase) | FR | Y | 281.78 | 0.06 | 0.86 | FALSE | FALSE |
| PP_1251 | Probable malate:quinone oxidoreductase 2 (EC 1.1.5.4) (MQO 2) (Malate dehydrogenase [quinone] 2) | H | N | 44.94 | 0.74 | 0.04 | FALSE | FALSE |
| PP_1317 | Ubiquinol-cytochrome c reductase iron-sulfur subunit (EC 7.1.1.8) | FR | N | 152.13 | 1.24 | 0.02 | TRUE | TRUE |
| PP_1318 | Cytochrome b | FR | N | 156.36 | 0.89 | 0.05 | TRUE | FALSE |
| PP_1319 | Ubiquinol--cytochrome c reductase, cytochrome c1 | FR | N | 152.73 | 1.32 | 0.06 | TRUE | FALSE |
| PP_1394 | Acetolactate synthase, large subunit | H | N | 170.67 | 1.14 |  | FALSE | FALSE |
| PP_1444 | Quinoprotein glucose dehydrogenase (EC 1.1.5.2) | H | N | 162.2 | 0.57 | 0.2 | TRUE | FALSE |
| PP_1457 | Formate-dependent phosphoribosylglycinamide formyltransferase (EC 6.3.1.21) (5'-phosphoribosylglycinamide transformylase 2) (Formate-dependent GAR transformylase) (GAR transformylase 2) (GART 2) (Non-folate glycinamide ribonucleotide transformylase) (Phosphoribosylglycinamide formyltransferase 2) | FR | N | 177.56 | 0.05 | 0.59 | TRUE | FALSE |
| PP_1506 | Adenylate kinase (AK) (EC 2.7.4.3) (ATP-AMP transphosphorylase) (ATP:AMP phosphotransferase) (Adenylate monophosphate kinase) | FR | Y | 233.58 | 0.06 | 0.63 | TRUE | TRUE |
| PP_1607 | Acetyl-coenzyme A carboxylase carboxyl transferase subunit alpha (ACCase subunit alpha) (Acetyl-CoA carboxylase carboxyltransferase subunit alpha) (EC 2.1.3.15) | H | Y | 239.52 | 0.03 | 0.87 | TRUE | FALSE |
| PP_1610 | CTP synthase (EC 6.3.4.2) (Cytidine 5'-triphosphate synthase) (Cytidine triphosphate synthetase) (CTP synthetase) (CTPS) (UTP--ammonia ligase) | FR | Y | 42.31 | 0.05 | 0.64 | FALSE | FALSE |
| PP_1620 | 5'-nucleotidase SurE (EC 3.1.3.5) (Nucleoside 5'-monophosphate phosphohydrolase) | FR | N | 86.73 | 1.11 | 0.02 | TRUE | FALSE |
| PP_1664 | Phosphoribosylglycinamide formyltransferase (EC 2.1.2.2) (5'-phosphoribosylglycinamide transformylase) (GAR transformylase) (GART) | FR | N | 166.03 | 0.06 | 2.05 | FALSE | FALSE |
| PP_1755 | Fumarate hydratase class II (Fumarase C) (EC 4.2.1.2) (Aerobic fumarase) (Iron-independent fumarase) | H | N | 114.76 | 0.77 | 0.05 | TRUE | FALSE |
| PP_1769 | Bifunctional chorismate mutase/prephenate dehydratase (EC 4.2.1.51) (EC 5.4.99.5) (Chorismate mutase-prephenate dehydratase) (p-protein) | FR | Y | 275.55 | 0.04 | 0.82 | TRUE | TRUE |
| PP_1770 | 3-phosphoshikimate 1-carboxyvinyltransferase (EC 2.5.1.19) (5-enolpyruvylshikimate-3-phosphate synthase) (EPSP synthase) (EPSPS) | FR | N | 252.55 | 0.04 | 0.93 | FALSE | FALSE |
| PP_1777 | Phosphomannomutase (EC 5.4.2.8) | H | N | 0.01 | 0.55 | 0.01 | FALSE | FALSE |
| PP_2095 | Dihydroorotate dehydrogenase (quinone) (EC 1.3.5.2) (DHOdehase) (DHOD) (DHODase) (Dihydroorotate oxidase) | FR | Y | 131.86 | 0.09 | 0.76 | TRUE | FALSE |
| PP_2112 | Aconitate hydratase (Aconitase) (EC 4.2.1.3) | H | N | 69.1 | 1.1 | 0.06 | FALSE | FALSE |
| PP_2136 | Fatty acid oxidation complex subunit alpha [Includes: Enoyl-CoA hydratase/Delta(3)-cis-Delta(2)-trans-enoyl-CoA isomerase/3-hydroxybutyryl-CoA epimerase (EC 4.2.1.17) (EC 5.1.2.3) (EC 5.3.3.8); 3-hydroxyacyl-CoA dehydrogenase (EC 1.1.1.35)] | H | N | 234.13 | 0.71 | 0.04 | TRUE | TRUE |
| PP_2137 | 3-ketoacyl-CoA thiolase (EC 2.3.1.16) (Acetyl-CoA acyltransferase) (Beta-ketothiolase) (Fatty acid oxidation complex subunit beta) | H | N | 188.36 | 0.81 | 0.02 | TRUE | FALSE |
| PP_2213 | Acyl-CoA synthetase (EC 6.2.1.-) | H | N | 188.38 | 0.82 | 0.06 | TRUE | FALSE |
| PP_2339 | Aconitate hydratase B (EC 4.2.1.3) (EC 4.2.1.99) (2-methylisocitrate dehydratase) | H | Y | 101.59 | 1 | 0.24 | TRUE | FALSE |
| PP_2471 | Integration host factor subunit alpha (IHF-alpha) | H | Y | 187.66 | 0.26 | 0.28 | TRUE | FALSE |
| PP_2589 | Aldehyde dehydrogenase family protein | H | N | 191.71 | 0.73 |  | FALSE | FALSE |
| PP_2925 | Probable malate:quinone oxidoreductase 3 (EC 1.1.5.4) (MQO 3) (Malate dehydrogenase [quinone] 3) | H | N | 93.04 | 0.58 | 0.07 | TRUE | FALSE |
| PP_3071 | Acetoacetyl-coenzyme A synthetase (EC 6.2.1.16) | H | N | 179.03 | 0.58 | 0.1 | TRUE | FALSE |
| PP_3122 | 3-oxoadipate CoA-transferase (EC 2.8.3.6) | H | N | 176.01 | 0.99 | 0.57 | FALSE | FALSE |
| PP_3123 | 3-oxoadipate CoA-transferase (EC 2.8.3.6) | H | N | 128.88 | 0.73 | 0.09 | TRUE | FALSE |
| PP_3280 | 3-oxoadipyl-CoA thiolase (EC 2.3.1.174) | H | N | 195.28 | 1.02 |  | FALSE | FALSE |
| PP_3282 | 3-hydroxyadipyl-CoA dehydrogenase (EC 1.1.1.35) | H | N | 157.76 | 0.53 |  | FALSE | FALSE |
| PP_3355 | Beta-ketothiolase | H | N | 241.72 | 0.42 |  | FALSE | FALSE |
| PP_3394 | 3-hydroxy-3-methylglutaryl-CoA lyase | H | N | 0.01 | 0.96 |  | FALSE | FALSE |
| PP_3578 | Phosphoglucomutase (EC 5.4.2.2) | H | N | 167.82 | 1.07 | 0.03 | TRUE | FALSE |
| PP_3744 | Transcriptional dual regulator GlcC-Glycolate | H | N | 225.8 | 0.91 |  | FALSE | FALSE |
| PP_3754 | Beta-ketothiolase BktB (EC 2.3.1.16, EC 2.3.1.9) | H | N | 176.57 | 0.48 | 0.07 | TRUE | FALSE |
| PP_3755 | 3-hydroxybutyryl-CoA dehydrogenase (EC 1.1.1.157) | H | N | 192.17 | 0.4 | 0.1 | TRUE | FALSE |
| PP_4011 | Isocitrate dehydrogenase [NADP] (EC 1.1.1.42) | H | N | 107.7 | 1 | 0.01 | TRUE | FALSE |
| PP_4012 | Isocitrate dehydrogenase [NADP] (EC 1.1.1.42) (Oxalosuccinate decarboxylase) | H | Y | 34.49 | 0.93 | 0.68 | FALSE | FALSE |
| PP_4043 | 6-phosphogluconate dehydrogenase, decarboxylating (EC 1.1.1.44) | FR | N | 140.31 | 0.61 |  | FALSE | FALSE |
| PP_4116 | Isocitrate lyase (EC 4.1.3.1) (Isocitrase) (Isocitratase) | FR | N | 143.07 | 0.84 | 0.07 | TRUE | FALSE |
| PP_4119 | NADH-quinone oxidoreductase subunit A (EC 7.1.1.-) (NADH dehydrogenase I subunit A) (NDH-1 subunit A) (NUO1) | FR | Y | 18.39 | 1.21 | 0.18 | FALSE | FALSE |
| PP_4120 | NADH-quinone oxidoreductase subunit B (EC 7.1.1.-) (NADH dehydrogenase I subunit B) (NDH-1 subunit B) | FR | N | 162 | 0.75 | 0.01 | TRUE | TRUE |
| PP_4121 | NADH-quinone oxidoreductase subunit C/D (EC 7.1.1.-) (NADH dehydrogenase I subunit C/D) (NDH-1 subunit C/D) | FR | N | 161.83 | 0.56 | 0.03 | TRUE | FALSE |
| PP_4122 | NADH-quinone oxidoreductase subunit E (NADH dehydrogenase I subunit E) (NDH-1 subunit E) | FR | N | 172.51 | 0.61 | 0.01 | TRUE | FALSE |
| PP_4123 | NADH-quinone oxidoreductase subunit F (EC 7.1.1.-) | FR | Y | 141.57 | 1.08 | 0.07 | TRUE | FALSE |
| PP_4128 | NADH-quinone oxidoreductase subunit K (EC 7.1.1.-) (NADH dehydrogenase I subunit K) (NDH-1 subunit K) | FR | Y | 166.33 | 1.19 |  | FALSE | FALSE |
| PP_4130 | NADH-quinone oxidoreductase subunit M (NADH dehydrogenase I subunit M) (NDH-1 subunit M) | FR | N | 128.68 | 0.18 | 3.11 | FALSE | FALSE |
| PP_4159 | Potassium-transporting ATPase KdpC subunit (ATP phosphohydrolase [potassium-transporting] C chain) (Potassium-binding and translocating subunit C) (Potassium-translocating ATPase C chain) | FR | N | 139.17 | 0.51 |  | FALSE | FALSE |
| PP_4160 | Potassium-transporting ATPase ATP-binding subunit (EC 7.2.2.6) (ATP phosphohydrolase [potassium-transporting] B chain) (Potassium-binding and translocating subunit B) (Potassium-translocating ATPase B chain) | FR | N | 124.45 | 0.65 |  | FALSE | FALSE |
| PP_4161 | Potassium-transporting ATPase potassium-binding subunit (ATP phosphohydrolase [potassium-transporting] A chain) (Potassium-binding and translocating subunit A) (Potassium-translocating ATPase A chain) | FR | N | 121.97 | 0.7 |  | FALSE | FALSE |
| PP_4174 | 3-hydroxydecanoyl-[acyl-carrier-protein] dehydratase (EC 4.2.1.59) (3-hydroxyacyl-[acyl-carrier-protein] dehydratase FabA) (Beta-hydroxydecanoyl thioester dehydrase) (Trans-2-decenoyl-[acyl-carrier-protein] isomerase) (EC 5.3.3.14) | FR | Y | 319.66 | 0.01 | 0.91 | FALSE | FALSE |
| PP_4175 | 3-oxoacyl-[acyl-carrier-protein] synthase 1 (EC 2.3.1.-, EC 2.3.1.41) | FR | Y | 169.98 | 0.06 | 0.76 | FALSE | FALSE |
| PP_4185 | Succinate--CoA ligase [ADP-forming] subunit alpha (EC 6.2.1.5) (Succinyl-CoA synthetase subunit alpha) (SCS-alpha) | H | Y | 114.95 | 0.24 | 0.44 | TRUE | FALSE |
| PP_4186 | Succinate--CoA ligase [ADP-forming] subunit beta (EC 6.2.1.5) (Succinyl-CoA synthetase subunit beta) (SCS-beta) | H | Y | 105.39 | 0.03 | 0.57 | TRUE | FALSE |
| PP_4187 | Dihydrolipoyl dehydrogenase (EC 1.8.1.4) | FR | Y | 143.8 | 0.02 | 0.62 | TRUE | FALSE |
| PP_4188 | Dihydrolipoyllysine-residue succinyltransferase component of 2-oxoglutarate dehydrogenase complex (EC 2.3.1.61) (2-oxoglutarate dehydrogenase complex component E2) | FR | Y | 209.97 | 0.81 | 0.19 | TRUE | FALSE |
| PP_4189 | oxoglutarate dehydrogenase (succinyl-transferring) (EC 1.2.4.2) | FR | Y | 291.4 | 0.32 | 0.11 | TRUE | TRUE |
| PP_4191 | Succinate dehydrogenase flavoprotein subunit (EC 1.3.5.1) | H | Y | 358.44 | 0.04 | 0.55 | TRUE | TRUE |
| PP_4192 | Succinate dehydrogenase hydrophobic membrane anchor subunit | H | Y | 232.69 | 0.12 | 0.87 | TRUE | TRUE |
| PP_4193 | Succinate dehydrogenase cytochrome b556 subunit | H | Y | 220.87 | 0.05 | 1 | FALSE | FALSE |
| PP_4194 | Citrate synthase | FR | Y | 271.03 | 0.03 | 0.96 | FALSE | FALSE |
| PP_4266 | Adenine phosphoribosyltransferase (APRT) (EC 2.4.2.7) | FR | N | 129.71 | 0.77 | 0.07 | TRUE | FALSE |
| PP_4487 | Acetyl-coenzyme A synthetase 1 (AcCoA synthetase 1) (Acs 1) (EC 6.2.1.1) (Acetate--CoA ligase 1) (Acyl-activating enzyme 1) | H | N | 191.4 | 0.88 | 0.01 | TRUE | FALSE |
| PP_4549 | Long-chain-fatty-acid/CoA ligase (EC 6.2.1.3) | H | N | 201.79 | 0.65 | 0.05 | TRUE | FALSE |
| PP_4550 | Long-chain-fatty-acid/CoA ligase (EC 6.2.1.3) | H | N | 102.97 | 0.47 | 0.59 | TRUE | FALSE |
| PP_4635 | Enoyl-[acyl-carrier-protein] reductase [NADH] (ENR) (EC 1.3.1.9) | FR | Y | 134.05 | 0.05 | 0.96 | FALSE | FALSE |
| PP_4636 | Acetyl-CoA acetyltransferase (EC 2.3.1.9) | H | N | 175.92 | 1.04 | 0.2 | TRUE | FALSE |
| PP_4650 | Ubiquinol oxidase subunit II, cyanide insensitive | FR | N | 127.49 | 0.78 |  | FALSE | FALSE |
| PP_4651 | Ubiquinol oxidase subunit I, cyanide insensitive | FR | N | 137.43 | 0.04 | 0.37 | TRUE | FALSE |
| PP_4667 | Methylmalonate-semialdehyde dehydrogenase (EC 1.2.1.27) | H | N | 178.38 | 0.74 | 0.16 | TRUE | FALSE |
| PP_4678 | Ketol-acid reductoisomerase (NADP(+)) (KARI) (EC 1.1.1.86) (Acetohydroxy-acid isomeroreductase) (AHIR) (Alpha-keto-beta-hydroxylacyl reductoisomerase) (Ketol-acid reductoisomerase type 1) (Ketol-acid reductoisomerase type I) | H | N | 165.54 | 0.02 | 0.64 | TRUE | FALSE |
| PP_4679 | Acetolactate synthase small subunit (AHAS) (ALS) (EC 2.2.1.6) (Acetohydroxy-acid synthase small subunit) | H | N | 67.06 | 0.03 | 0.44 | FALSE | FALSE |
| PP_4702 | Acetyl-coenzyme A synthetase 2 (AcCoA synthetase 2) (Acs 2) (EC 6.2.1.1) (Acetate--CoA ligase 2) (Acyl-activating enzyme 2) | H | N | 173.16 | 0.39 | 25.6 | FALSE | FALSE |
| PP_4737 | D-lactate dehydrogenase (EC 1.1.-.-) | H | N | 184.85 | 0.84 |  | FALSE | FALSE |
| PP_4862 | 3-hydroxy acid dehydrogenase, NADP-dependent / malonic semialdehyde reductase (EC 1.1.1.276, EC 1.1.1.298) | FR | N | 143.94 | 0.66 | 0.1 | TRUE | FALSE |
| PP_4894 | RNA-binding protein Hfq | H | Y | 44.86 | 0.04 | 0.43 | FALSE | FALSE |
| PP_5064 | Oxygen-dependent choline dehydrogenase (CDH) (CHD) (EC 1.1.99.1) (Betaine aldehyde dehydrogenase) (BADH) (EC 1.2.1.8) | H | N | 10.57 | 0.02 | 0.98 | FALSE | FALSE |
| PP_5128 | Dihydroxy-acid dehydratase (DAD) (EC 4.2.1.9) | FR | N | 107.17 | 0.06 | 1 | FALSE | FALSE |
| PP_5186 | Acetylornithine deacetylase (EC 3.5.1.16) | FR | N | 110.44 | 1.03 | 0.01 | TRUE | FALSE |
| PP_5203 | 5-formyltetrahydrofolate cyclo-ligase (EC 6.3.3.2) | FR | N | 132.15 | 0.77 | 0.26 | TRUE | FALSE |
| PP_5288 | Phosphomannomutase/phosphoglucomutase (PMM / PGM) (EC 5.4.2.2) (EC 5.4.2.8) | H | N | 162.86 | 0.78 | 0.03 | TRUE | FALSE |
| PP_5335 | N5-carboxyaminoimidazole ribonucleotide synthase (N5-CAIR synthase) (EC 6.3.4.18) (5-(carboxyamino)imidazole ribonucleotide synthetase) | H | Y | 214.31 | 0.03 | 1.03 | FALSE | FALSE |
| PP_5416 | ATP synthase subunit delta (ATP synthase F(1) sector subunit delta) (F-type ATPase subunit delta) (F-ATPase subunit delta) | H | Y | 152.72 | 0.02 | 1.17 | FALSE | FALSE |
| PP_5417 | ATP synthase subunit b (ATP synthase F(0) sector subunit b) (ATPase subunit I) (F-type ATPase subunit b) (F-ATPase subunit b) | H | Y | 202.53 | 0.15 | 0.84 | TRUE | FALSE |
| PP_5419 | ATP synthase subunit a (ATP synthase F0 sector subunit a) (F-ATPase subunit 6) | H | Y | 391.45 | 0.02 | 0.02 | FALSE | FALSE |
| PP_5420 | ATP synthase protein I | H | Y | 91.6 | 0.03 |  | FALSE | FALSE |

#

# **
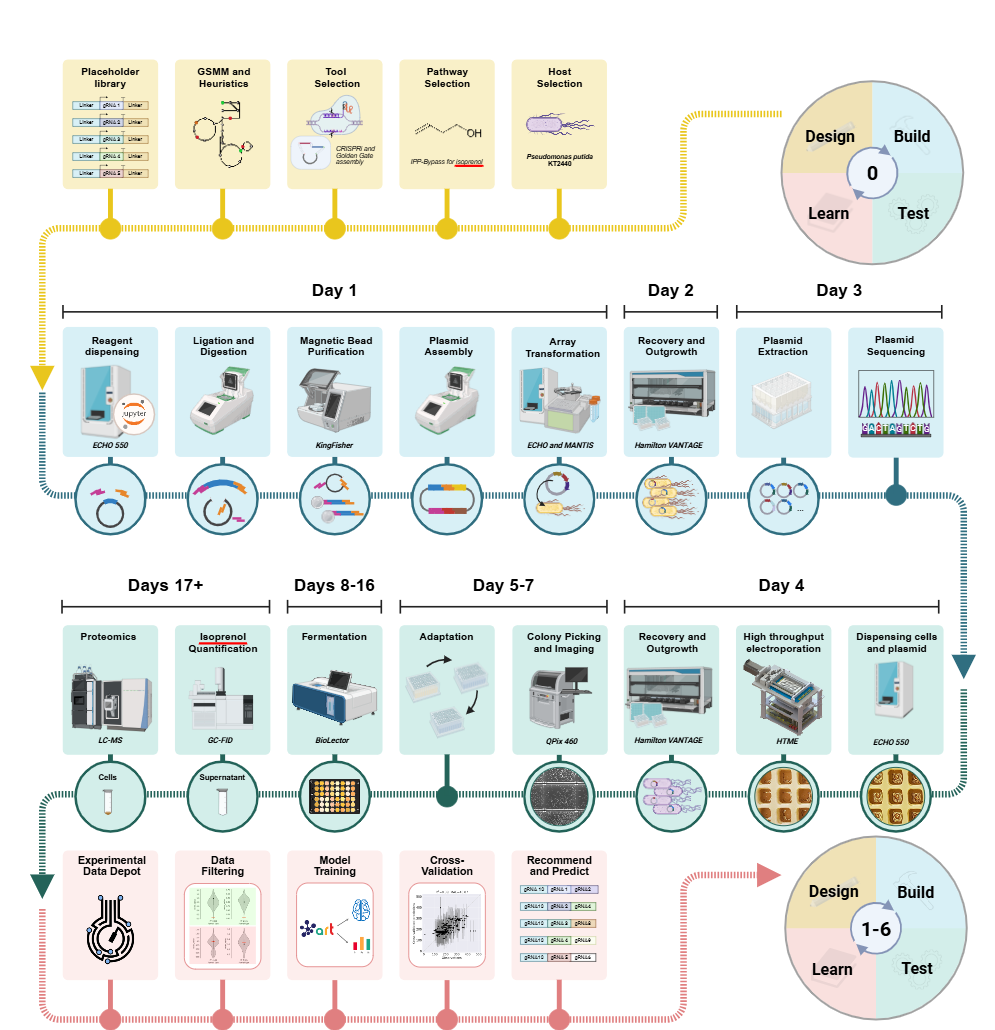
**

# **Fig. S1: A thorough breakdown of DBTL cycles with a DBT timeline.** Lists of designs were generated by ART. Recommended CRISPRi arrays were then parsed by a Jupyter notebook to generate ECHO dispense lists that could readily be used with reagents for digestion, ligation, and transformation. Where possible, individual instruments used for each step are supplied and labeled. The timeline “days” are typical estimates based on average run time. Sometimes data collection, especially for proteomics and isoprenol, had extended wait times owing to machine availability. This image was generated using BioRender.com.

# **
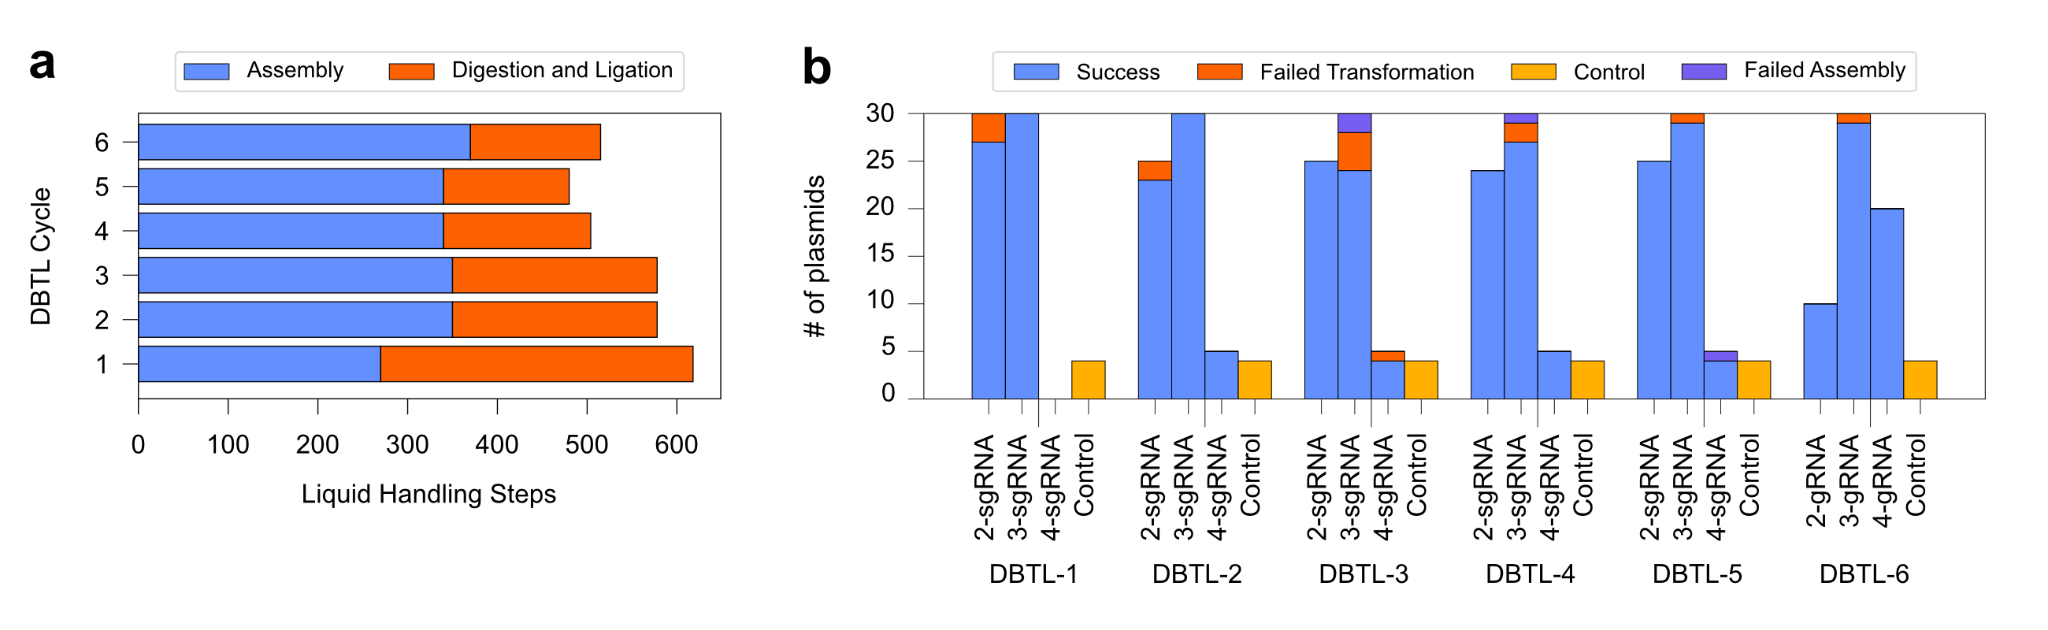
**

# **Fig. S2:** Liquid handling movements performed by automated laboratory equipment and number of sgRNA units per cycle. **a)** More digestion/ligation dispenses were required in early cycles owing to an increased number of unique sgRNAs while assembly dispenses increased in later cycles as the sgRNA arrays lengthened. There were 3273 liquid handling steps made across all 6 cycles. **b)** Number of unique sgRNA arrays constructed each cycle with DBTL6 maintaining more four sgRNAs than earlier cycles. There was no clear evidence that longer assemblies had higher rates of failure

# **
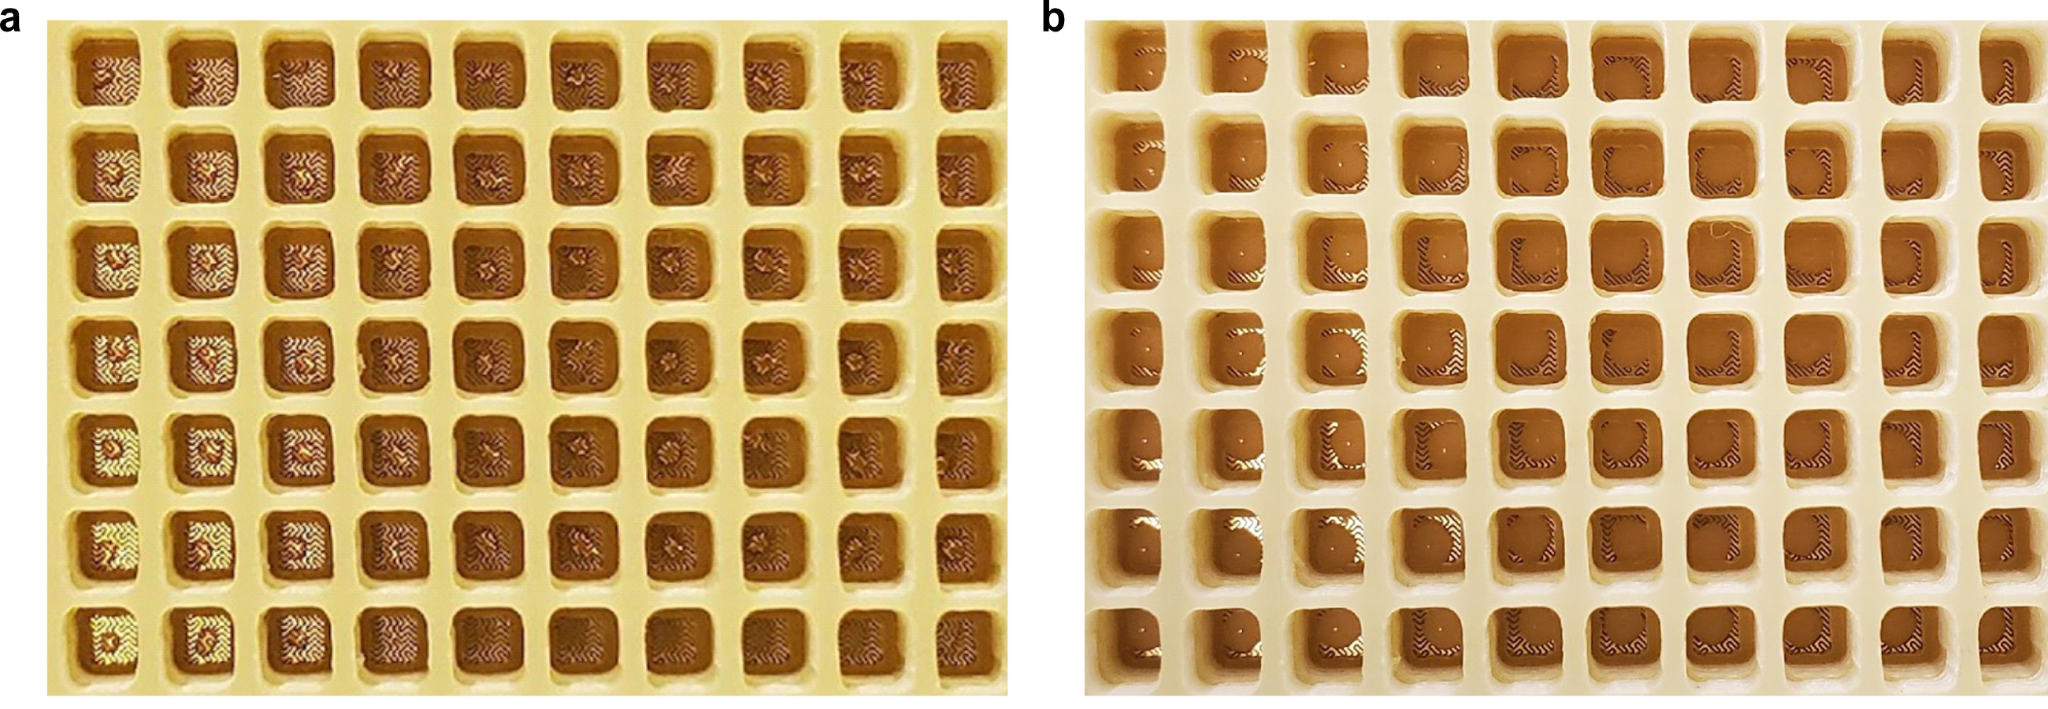
**

# **Fig. S3: Dispensing of plasmid and electrocompetent *P. putida* cells using the ECHO 550. a)** A 200 nL aliquot of plasmid was first dispensed. **b)** 2 uL of electrocompetent cells were then dispensed on top of the plasmid droplet.

# **
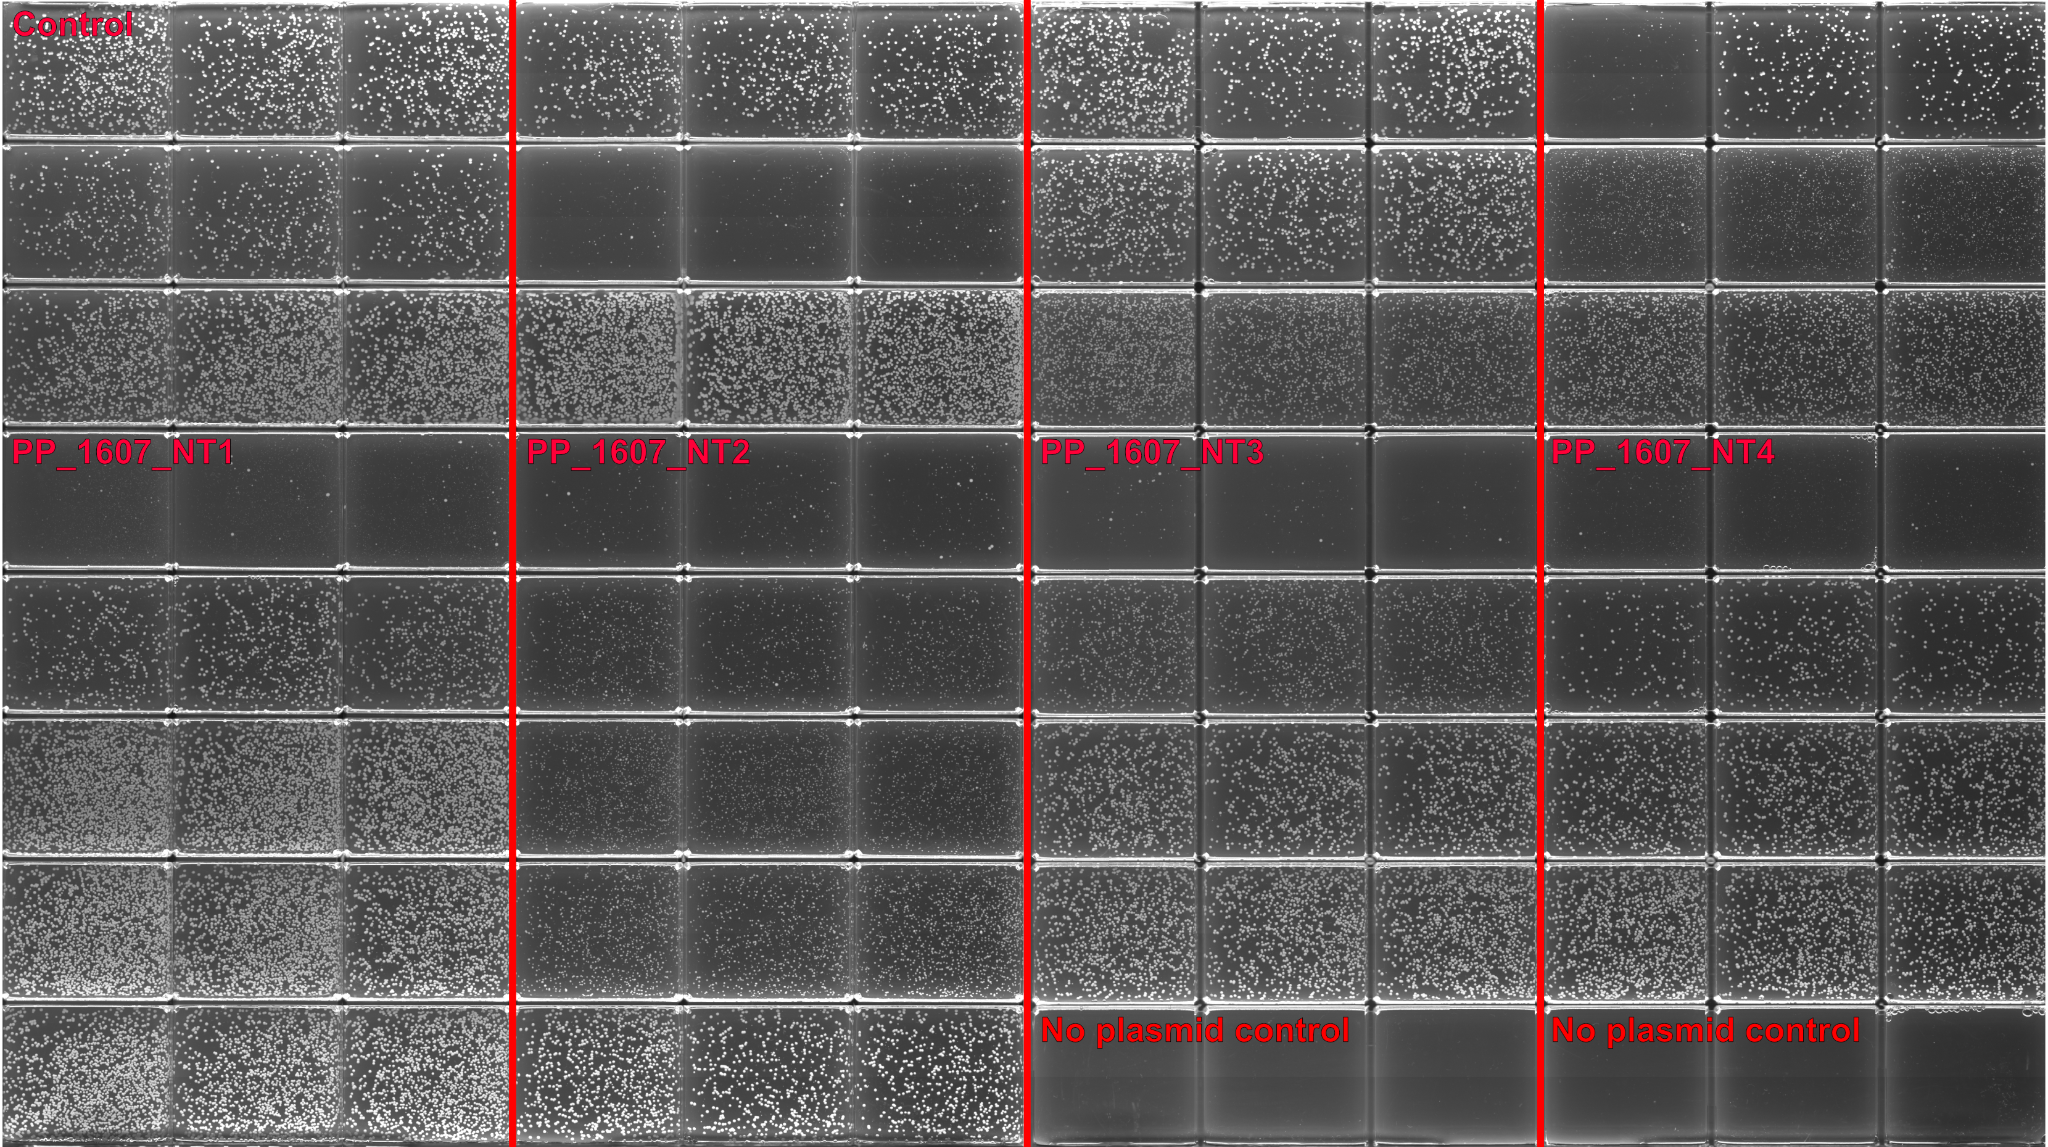
** **Fig. S4: An example Q-Tray of 32 transformations in triplicate.** Image taken with QPix 460. Different PP_1607 sgRNAs, the non-target sgRNA (control), and no plasmid controls are annotated. Each triplicate transformed a different sgRNA harboring plasmid and there are clear differences in colony morphology between triplicates due to relative growth burden associated with those sgRNAs. In particular, PP_1607 encodes a subunit of acetyl-coenzyme A carboxylase. Downregulation of PP_1607 had a significant impact on viable CFUs and many failed the proteomics filter.

# **
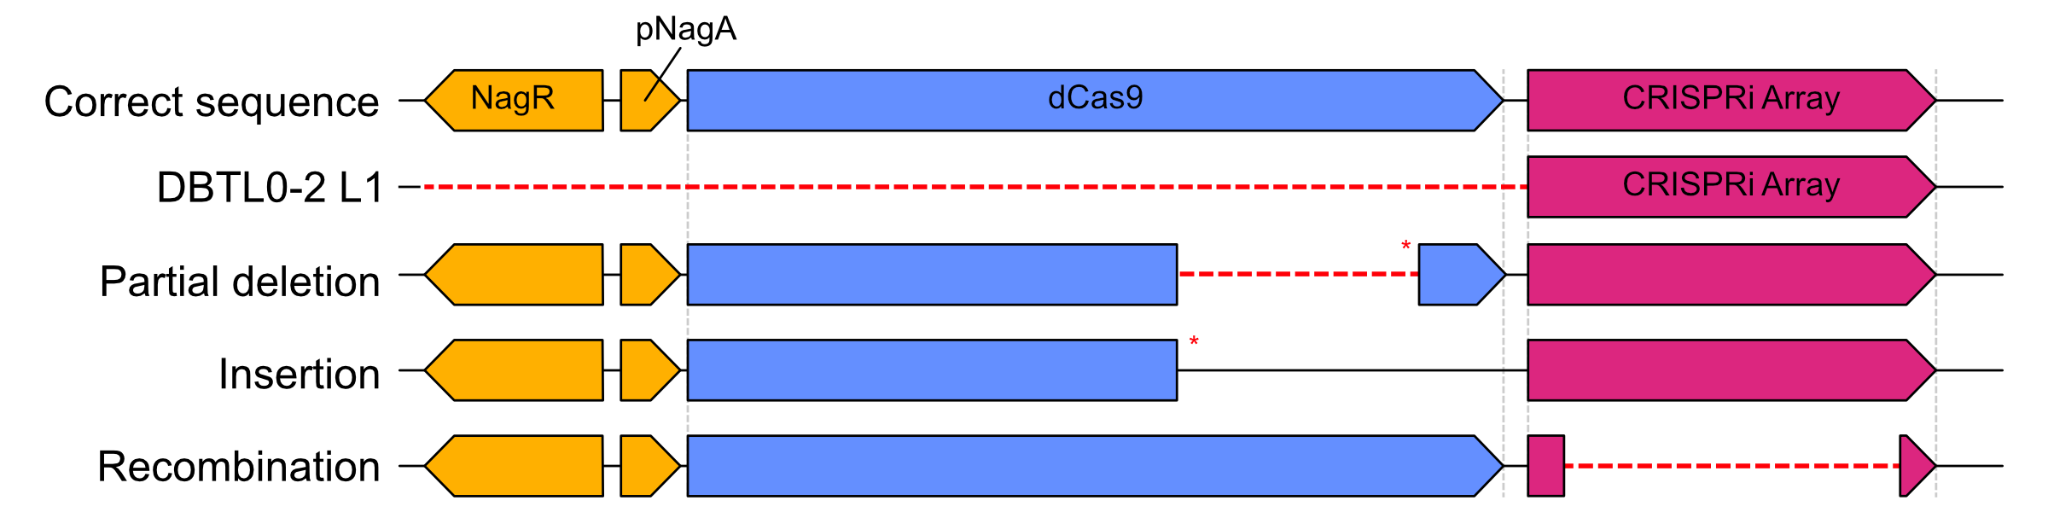
**

# **Fig. S5: Modes of CRISPRi failure across DBTL cycles.** Initially, recombination in DBTL0-2 occurred across homologous linkers that flanked dCas9, resulting in a plasmid that lacked dCas9 altogether. This failure mode was repaired in DBTL3 onwards by replacing the flexible linker, “L1”, with a different linker, “L7”, which tended to improve dCas9 fidelity. Plasmids were sequenced after DBTL3 and revealed significant changes. Recombination often occurred due to homology of the dCas9 handle (40 bp), terminator (45 bp), and assembly scar (6 bp). While homologous recombination can be mitigated by using non-repetitive handles, terminators, and promoters, non-repetitive elements introduce positional dependent effects and do not necessarily improve sgRNA array fidelity. Other modes of failure included a partial deletion of dCas9 and single nucleotide insertion into dCas9, both of which resulted in a premature stop codon. Truncated proteins are especially troubling because they may be overlooked in -omics analysis (i.e., total abundance/counts may remain high in a partially truncated 5 kb gene). In short, *P. putida* is very capable of adapting to overcome the physiological burden imparted by CRISPRi.

# **
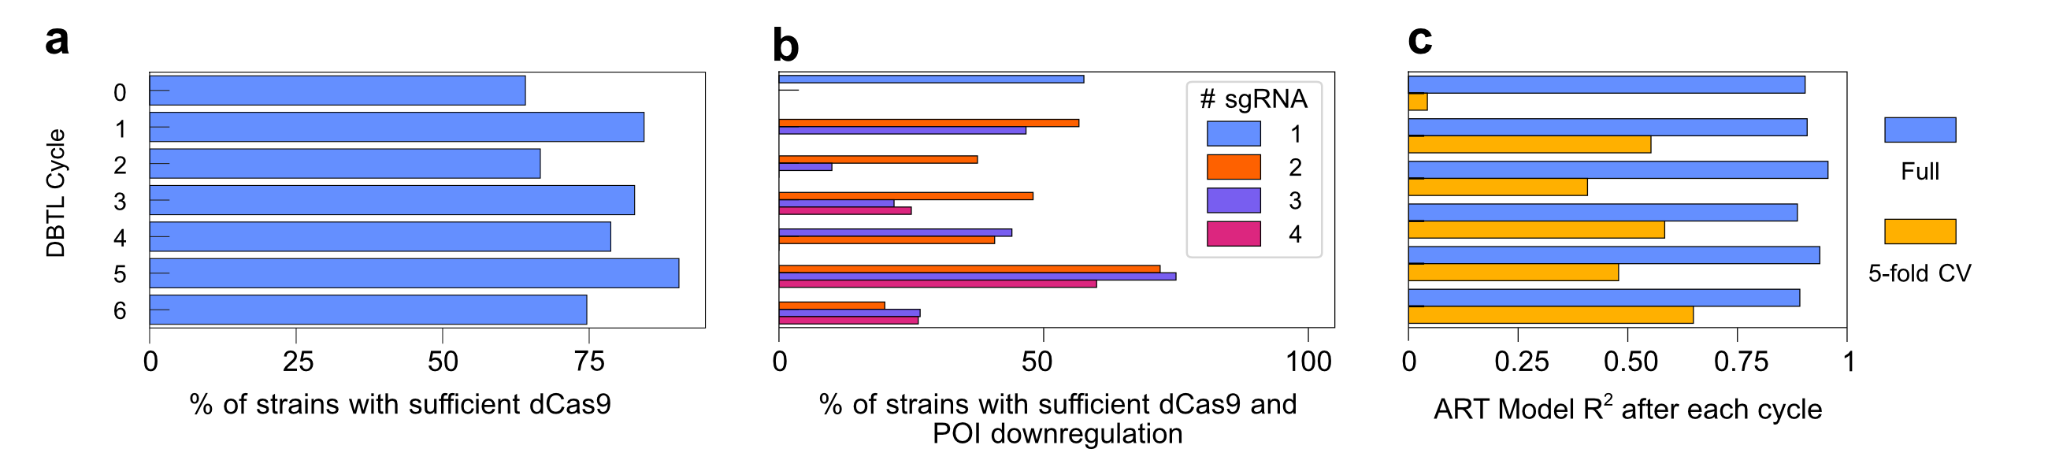
**

# **Fig. S6: Analysis of failing strains by failure mode with ART Model performance over each cycle.** **a)** The percentage of strains with dCas9 below 50% of control across each DBTL cycle. The dCas9 plasmid was re-engineered after DBTL2 to improve fidelity. **b)** The overall filter passage rate is based on dCas9 expression and target downregulation for each cycle, split by the number of sgRNA in each strain. **c)** ART model performance measured by R2 after DBTL cycles 1-6, when trained on the full dataset (blue) or trained using 5-fold cross validation. After DBTL3, only data from cycle 3 onward was used to train ART.

# **
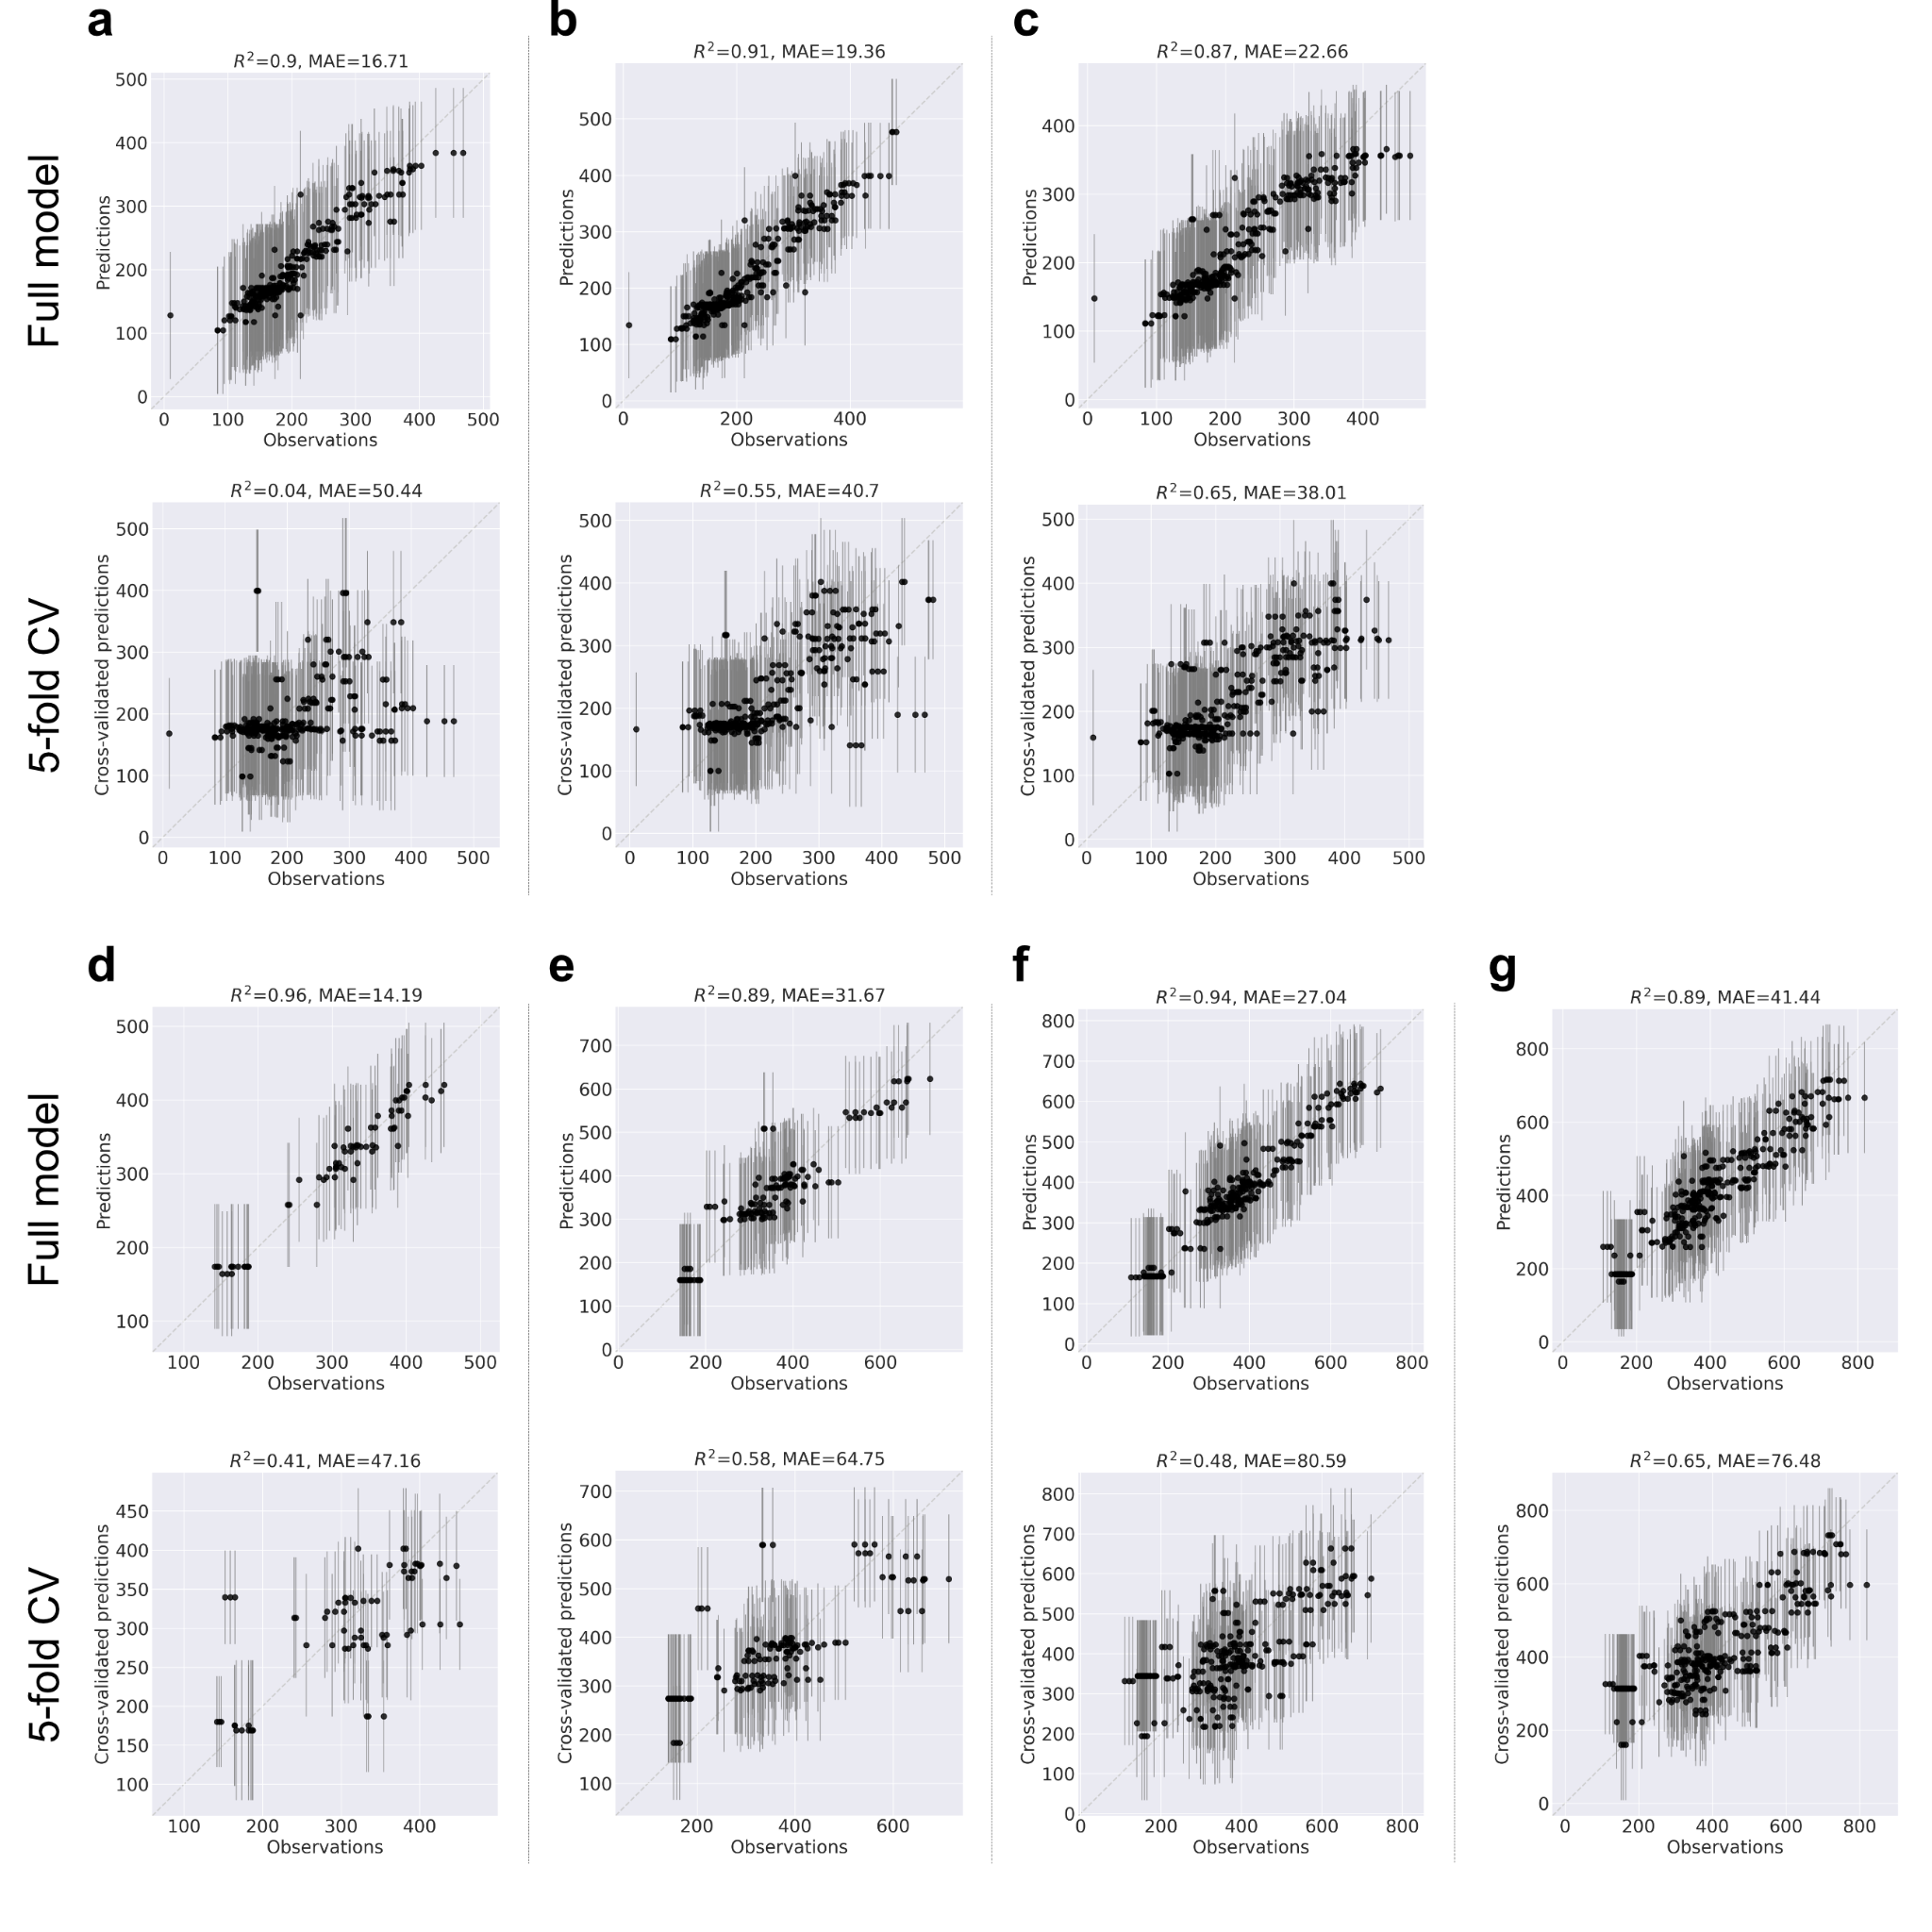
**

# **Fig. S7: Parity plot of the full and cross-validated ART models throughout the pipeline for predicted and observed isoprenol titers (mg/L)**. **a)** DBTL1 models. **b)** DBTL2 models. **c)** DBTL3 models using all data (DBTL1-3). **d)** DBTL3 models exclusively using data from DBTL3). **e)** DBTL4 models using DBTL3-4 data. **f)** DBTL5 models using DBTL3-5 data. G) DBTL6 models using DBTL3-6 data.

# **
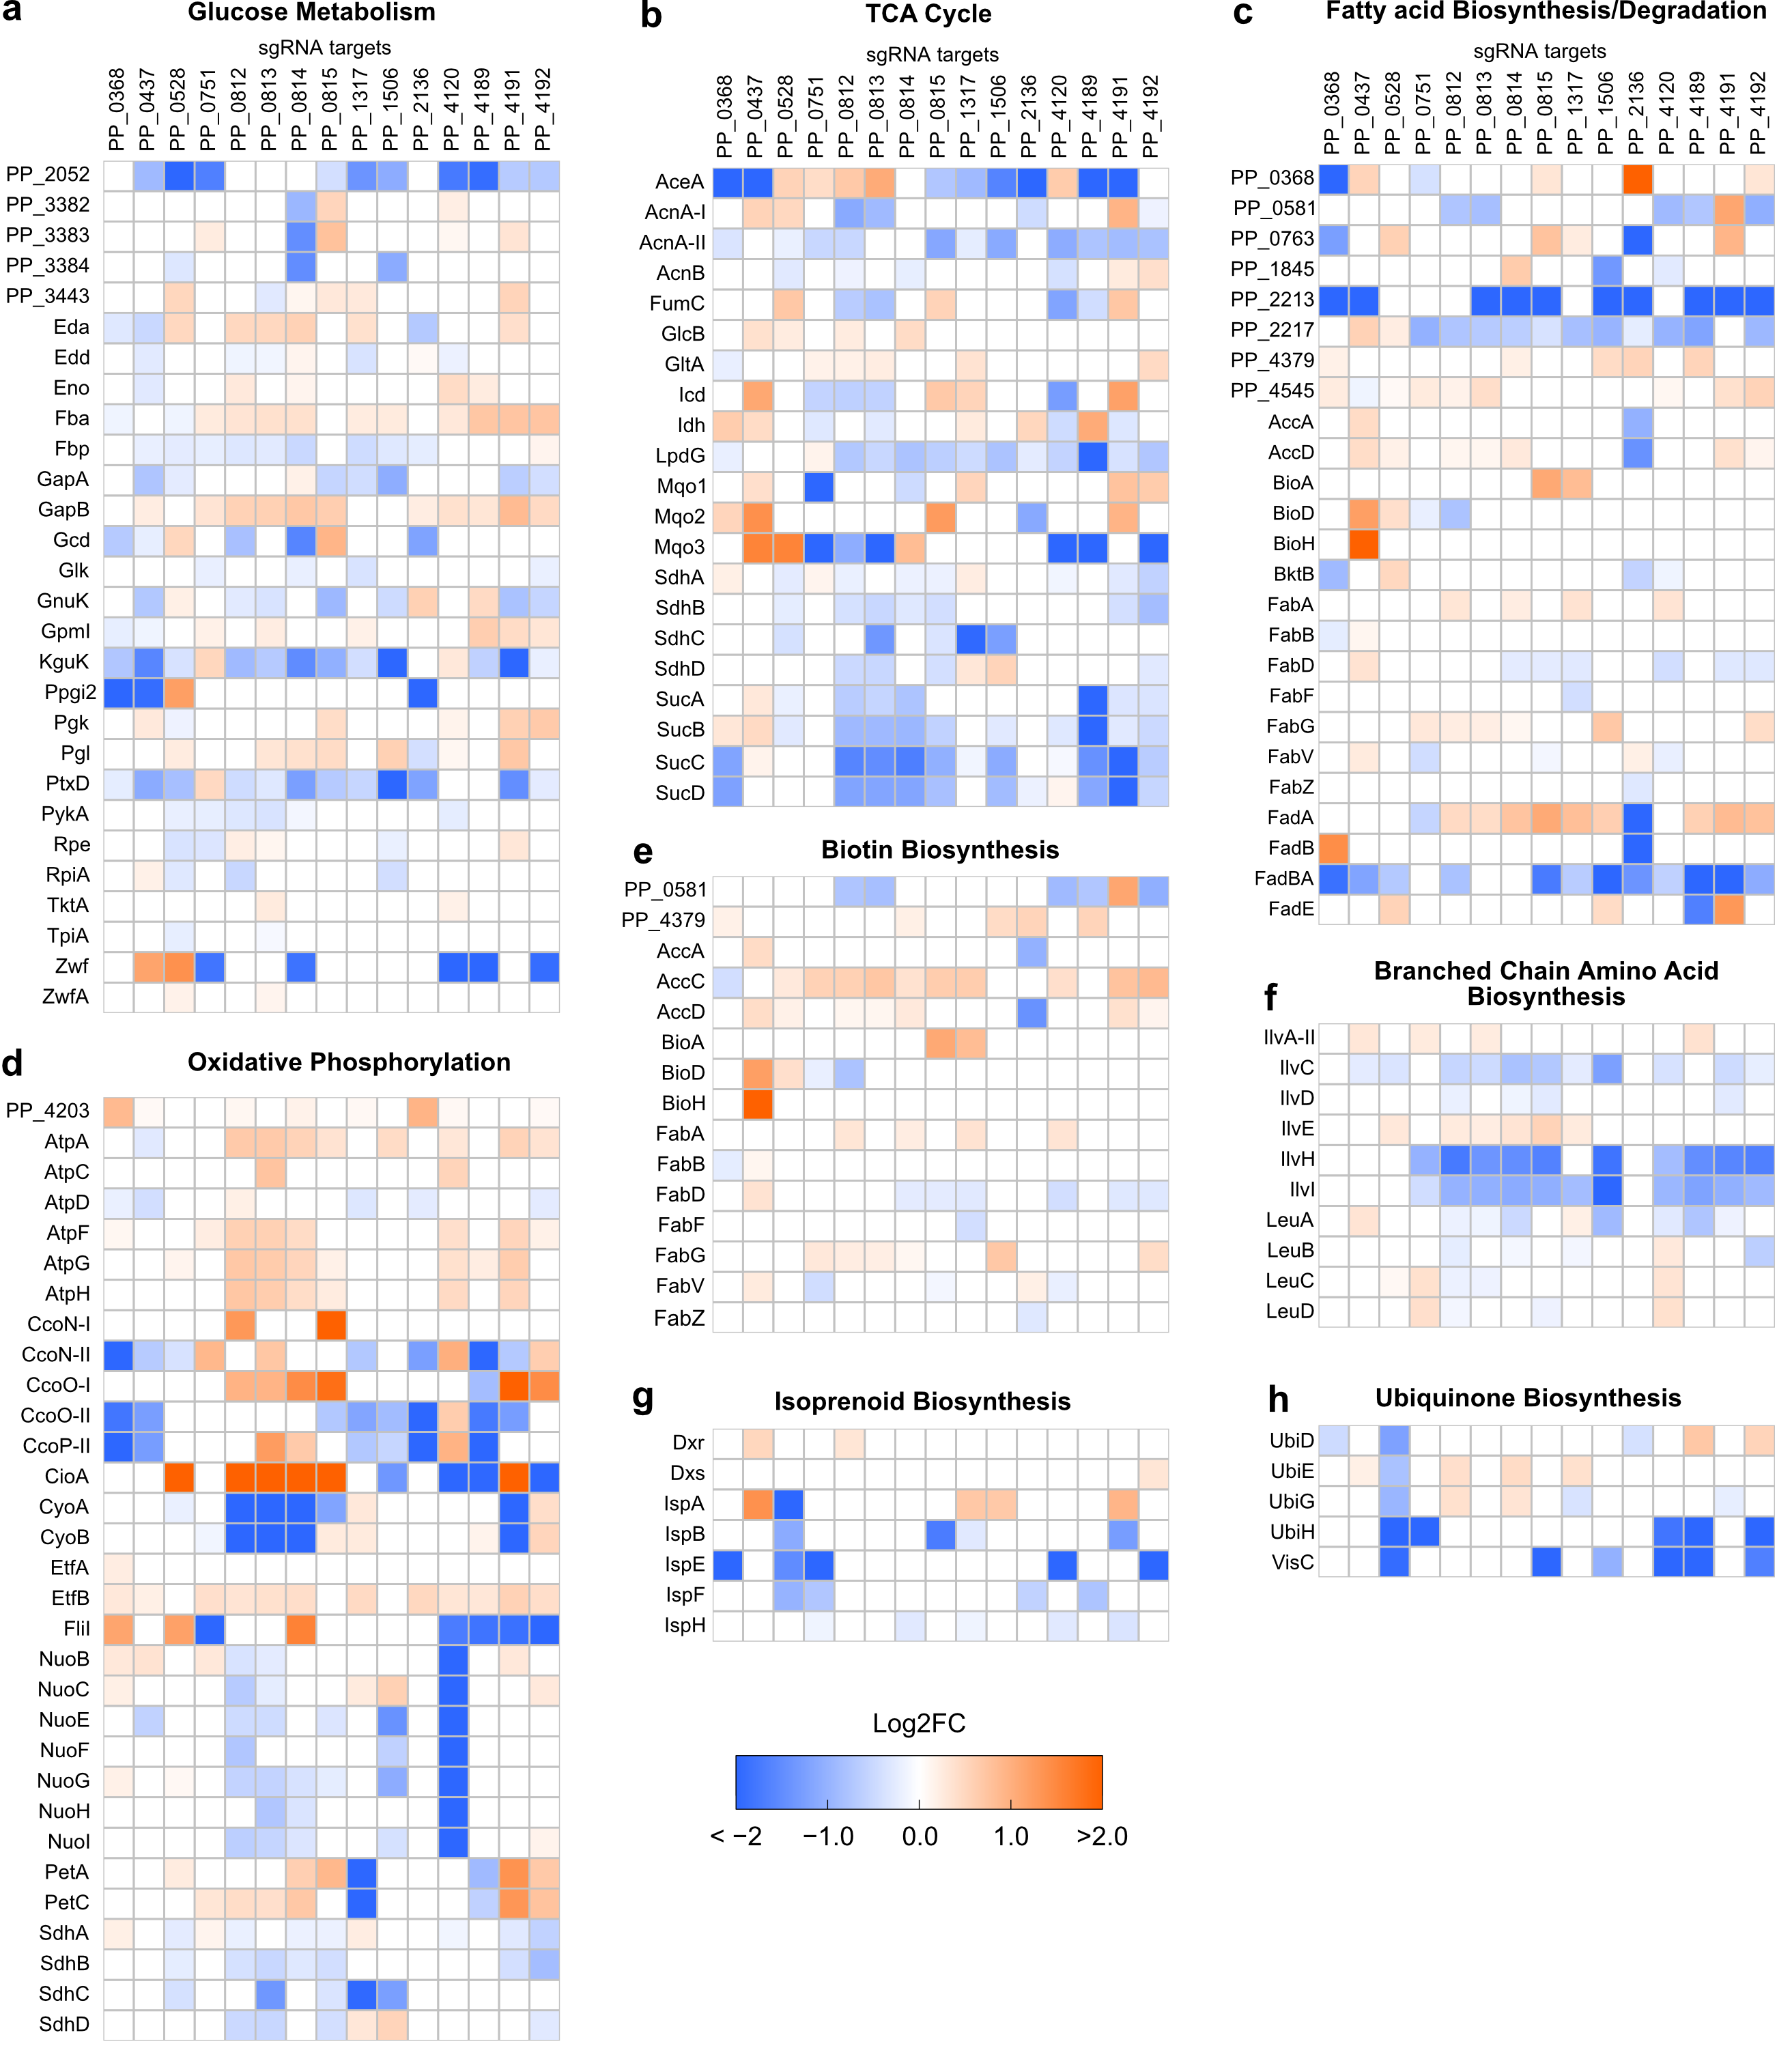
** **Fig. S8: Proteomics heatmaps of relevant pathways among best performing sgRNAs compared to the non-target control strain. a)** Glucose metabolism. **b)** Tricarboxylic acid cycle proteins, notably with SucC-D downregulation and mixed glyoxylate shunt protein levels. **c)** Pooled fatty acid biosynthesis and degradation (beta-oxidation) proteins. Most notably PP_2213 and fadBA, which are coexpressed, were downregulated. PP_0368 tended to increase fadB (PP_2136) levels and vice versa. **d)** Oxidative phosphorylation had significant changes with terminal oxidase protein levels and downregulation of PP_4120 (nuoB) downregulated other subunits comprising NADH-quinone oxidoreductase. ATP subunits were typically unregulated when different ETC complex proteins were targeted. **e)** Biotin biosynthesis was most significantly impacted when, as expected, PP_0437 (bifunctional biotin-ACC ligase/biotin operon repressor) was downregulated. **f)** ilvH and ilvI were predominately downregulated within the branched chain amino acid biosynthesis pathway. **g)** Isoprenoid biosynthesis protein levels were most strongly impacted by downregulation of PP_0528. **h)** Ubiquinone biosynthesis was likewise largely impacted by PP_0528 downregulation, with several other sgRNA targets resulting in decreased protein levels.

**
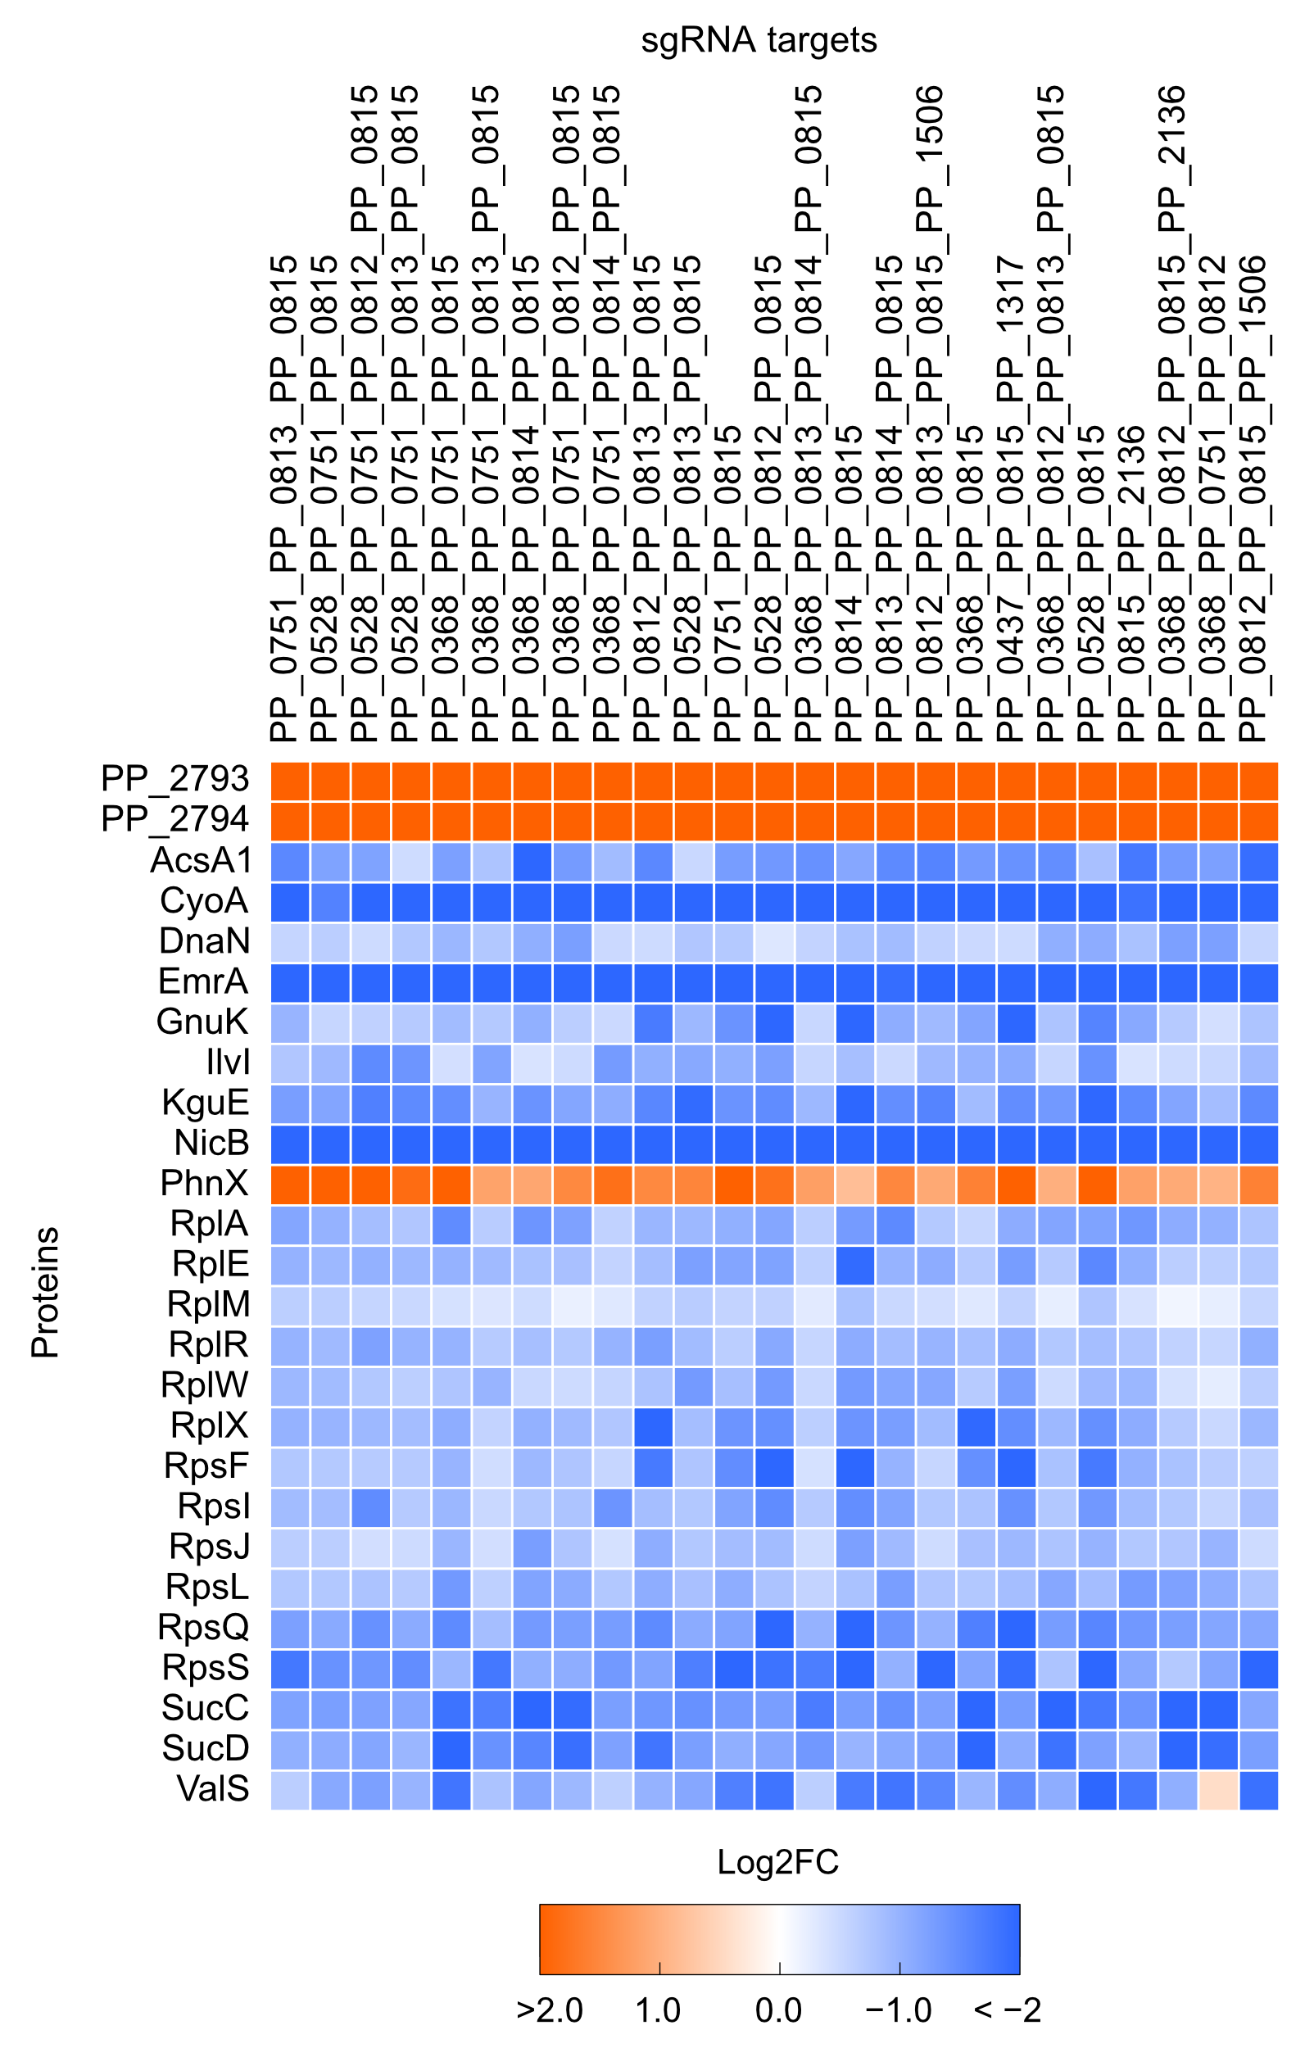
**

# **Fig. S9: Heatmap of significantly changed proteins present in all 25 best performing CRISPRi strains.** Depicts the protein levels that were significantly changed across 25 of the best performing sgRNA combinations. Notably, significant ribosomal proteins (rps/rpl) were downregulated along with some glycolysis proteins (gnuK, kguE), and valine-tRNA ligase (valS), a protein also strongly suggested by STABL. An acyl-CoA synthetase (acsA1), sucC-D (succinyl-CoA synthetase), and ilvI (acetohydroxybutanoate synthase/acetolactate synthase) were also downregulated across all strains. Finally, phnX is a phosphonoacetaldehyde hydrolase while PP_2793-94 encodes proteins in the levulinate degradation pathway. This map is by no means comprehensive but instead reflects protein levels most reliably changed in our best performing strains.

# **
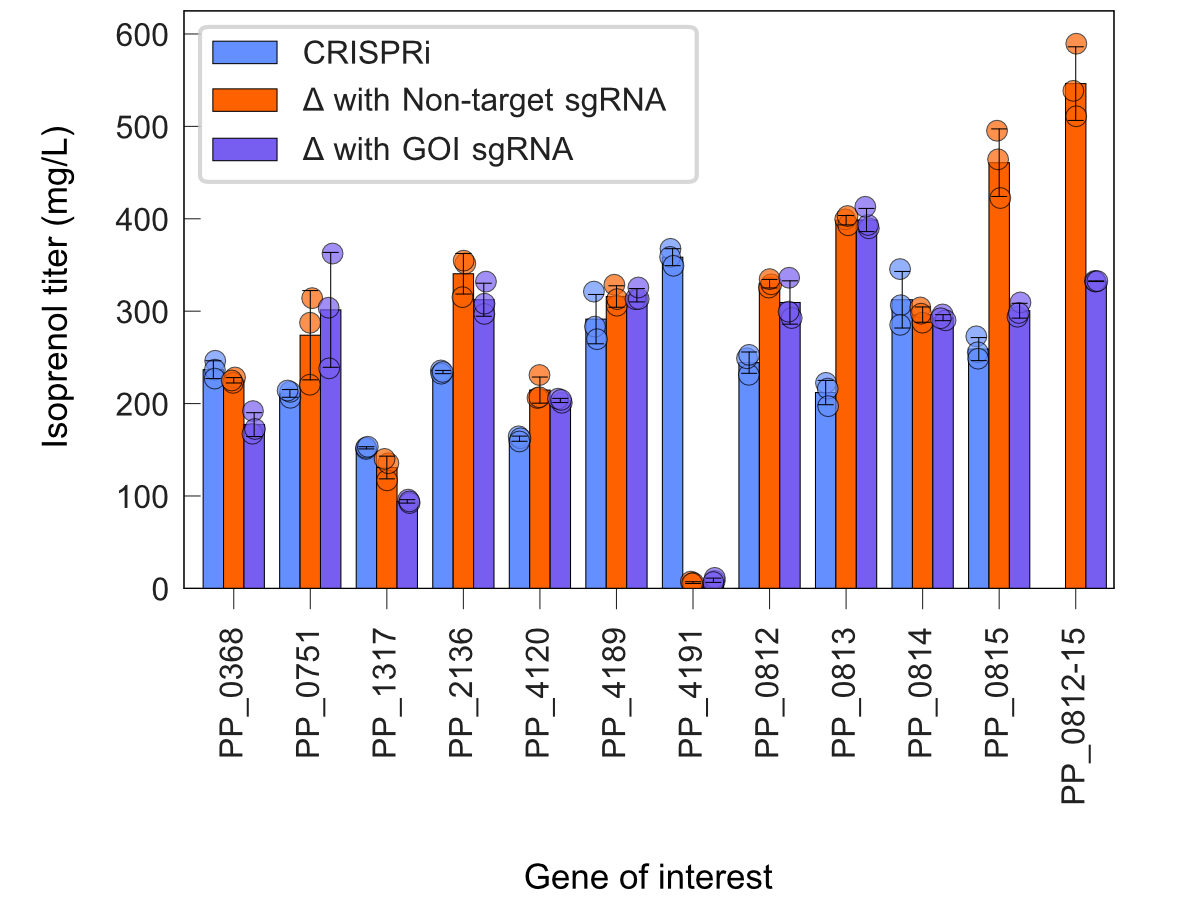
**

# **Fig. S10:** Comparison of titers between KO strains harboring sgRNAs and their CRISPRi analogues. Most KO strains performed similarly with the non-target and target sgRNAs, indicating no obvious off-target effects.The ΔPP_2136, ΔPP_0812, and ΔPP_0813 strains showed higher performance than their CRISPRi analogues. ΔPP_0815 strains harboring the PP_0815 sgRNA showed clear increases in titer compared to the non-target sgRNA. Differences in isoprenol production by target and non-target sgRNAs are noted in Figure 6A.

# **
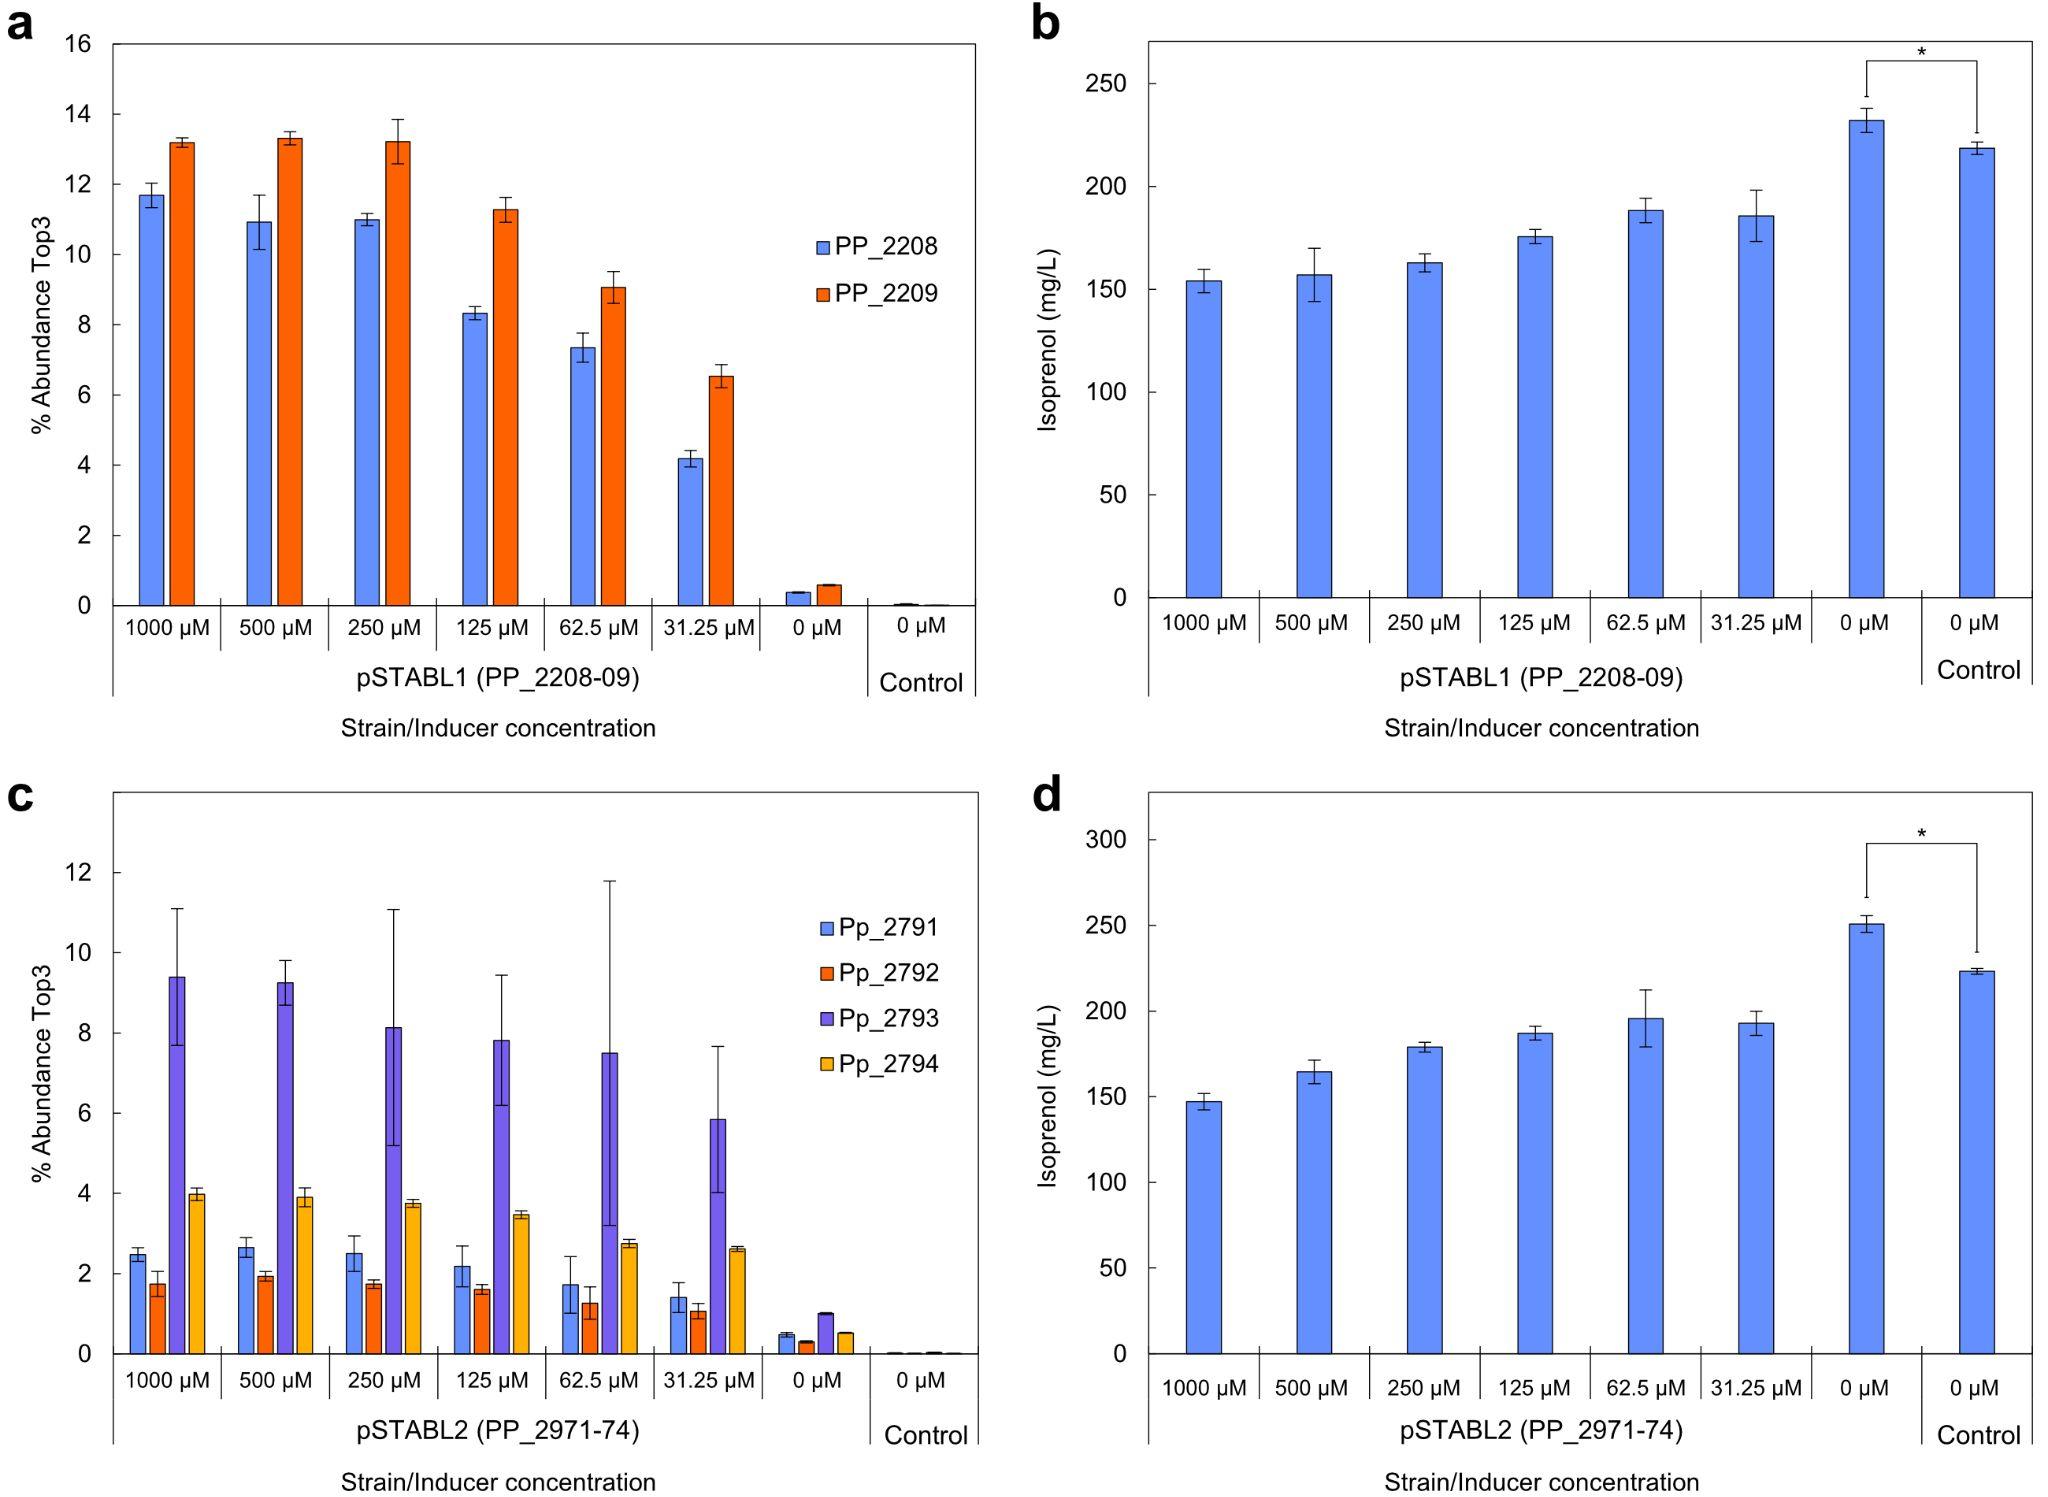
**

# **Fig. S11: Overexpression of genes (PP_2971-74 and PP_2208-09) that are highly expressed in high titer isoprenol strains. a)** Top3 protein abundance of PP_2208-09 (PhnW-X; phosphonoacetylaldehyde hydrolyase) under various inducer concentrations. Induced expression led to exceptionally high protein abundance. **b)** Uninduced expression of PP_2207-08 yielded marginally more isoprenol compared to an RFP control **c)** Top3 protein abundance of PP_2791-94 (levulinic acid degradation pathway LvaA-D) under various induction concentrations. Induction also led to high pathway protein abundances. **d)** As with PP_2208-09, induction of PP_2791-94 broadly reduced titers, potentially due to sheer protein abundance. Uninduced expression, however, showed a ~10% increase in titer compared to the RFP control.

# **
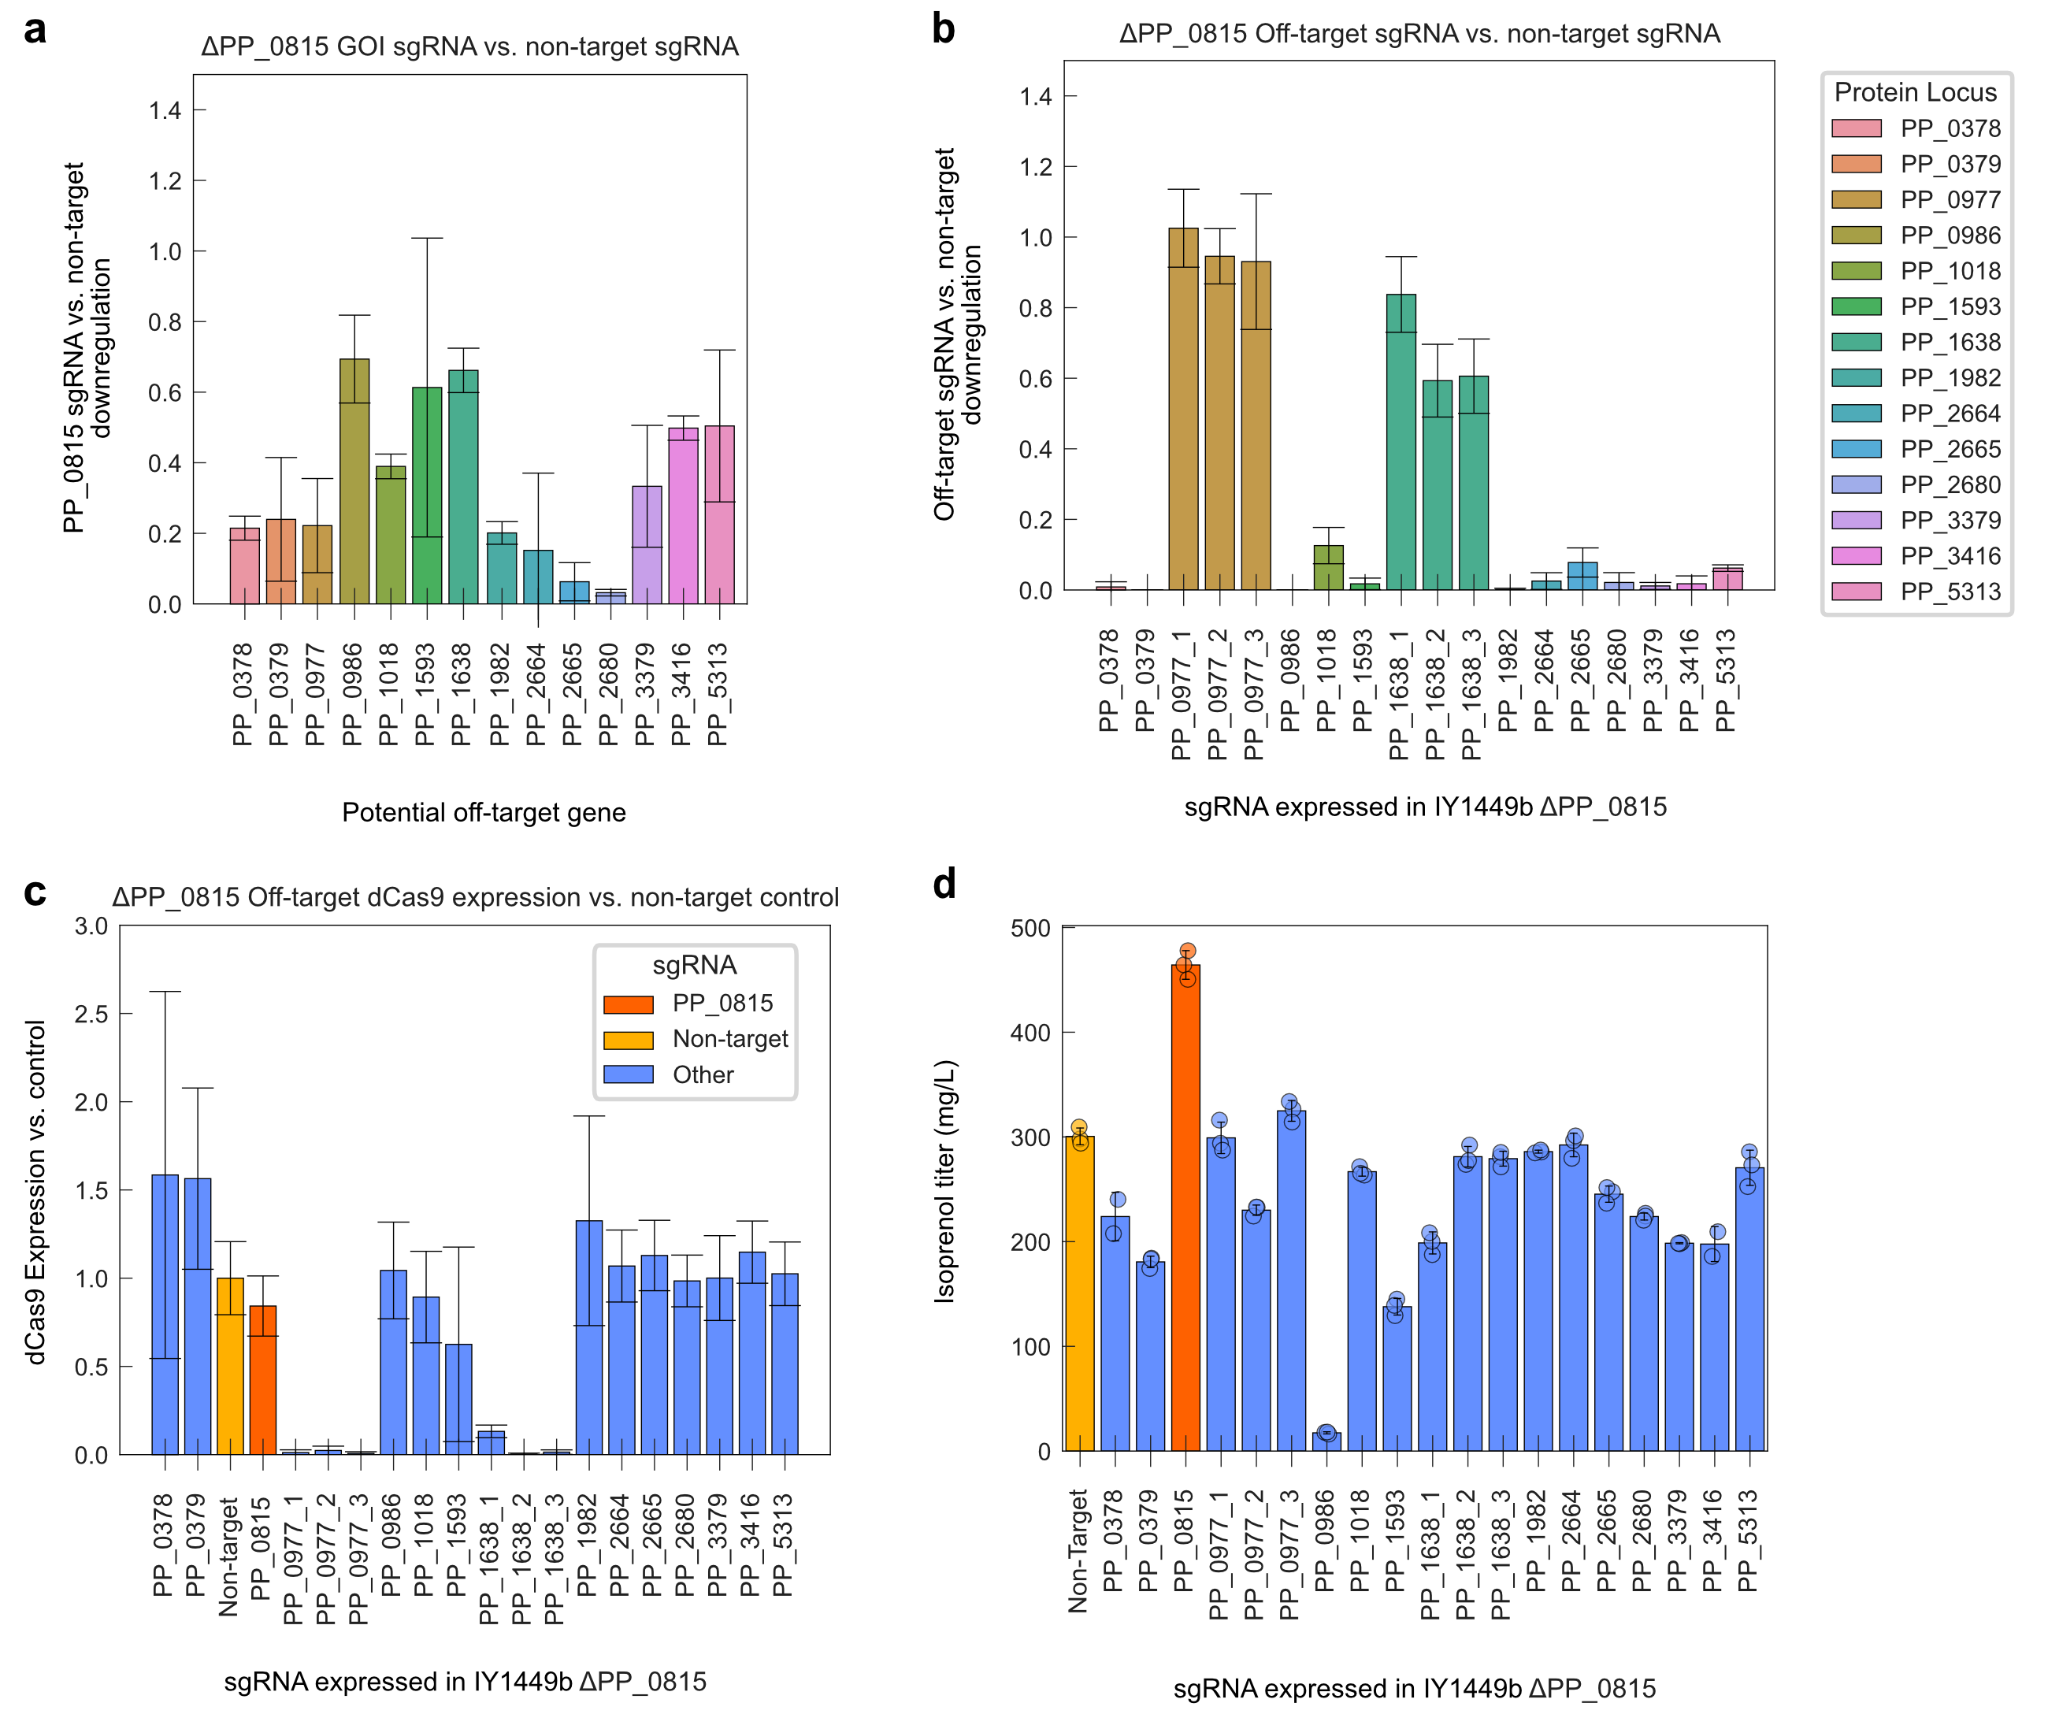
****Fig. S12:** **Investigation of potential PP_0815 sgRNA off-targets and the impact of their downregulation on isoprenol titer. a)** Analysis of potential off-target gene expression in a ΔPP_0815 strain harboring the PP_0815 sgRNA compared to their expression in a strain with a non-target sgRNA. As before, all gene expression is substantially lower across potential off-target genes. **b)** Expression of various sgRNAs targeting the potential off-target genes in a ΔPP_0815 strain. Potential off-targets were typically downregulated with the exceptions of PP_0977 (valine tRNA-ligase) and PP_1638 (ferredoxin--NADP(+) reductase). These strains were cultured three times owing to poor transformation efficiency. **c)** dCas9 levels in all ΔPP_0815 derivatives. Notably, all strains harboring the PP_0977 and PP_1638 sgRNAs failed to adequately express dCas9, indicating that the colonies that survived transformation were able to eliminate dCas9. This is unsurprising as these genes are probably essential. **d)** Isoprenol titers of off-target sgRNA strains failed to recapitulate the observed titer of ΔPP_0815 harboring the PP_0815 sgRNA. At best, the off-target strains performed as well as the ΔPP_0815 strain harboring non-target sgRNA.

#
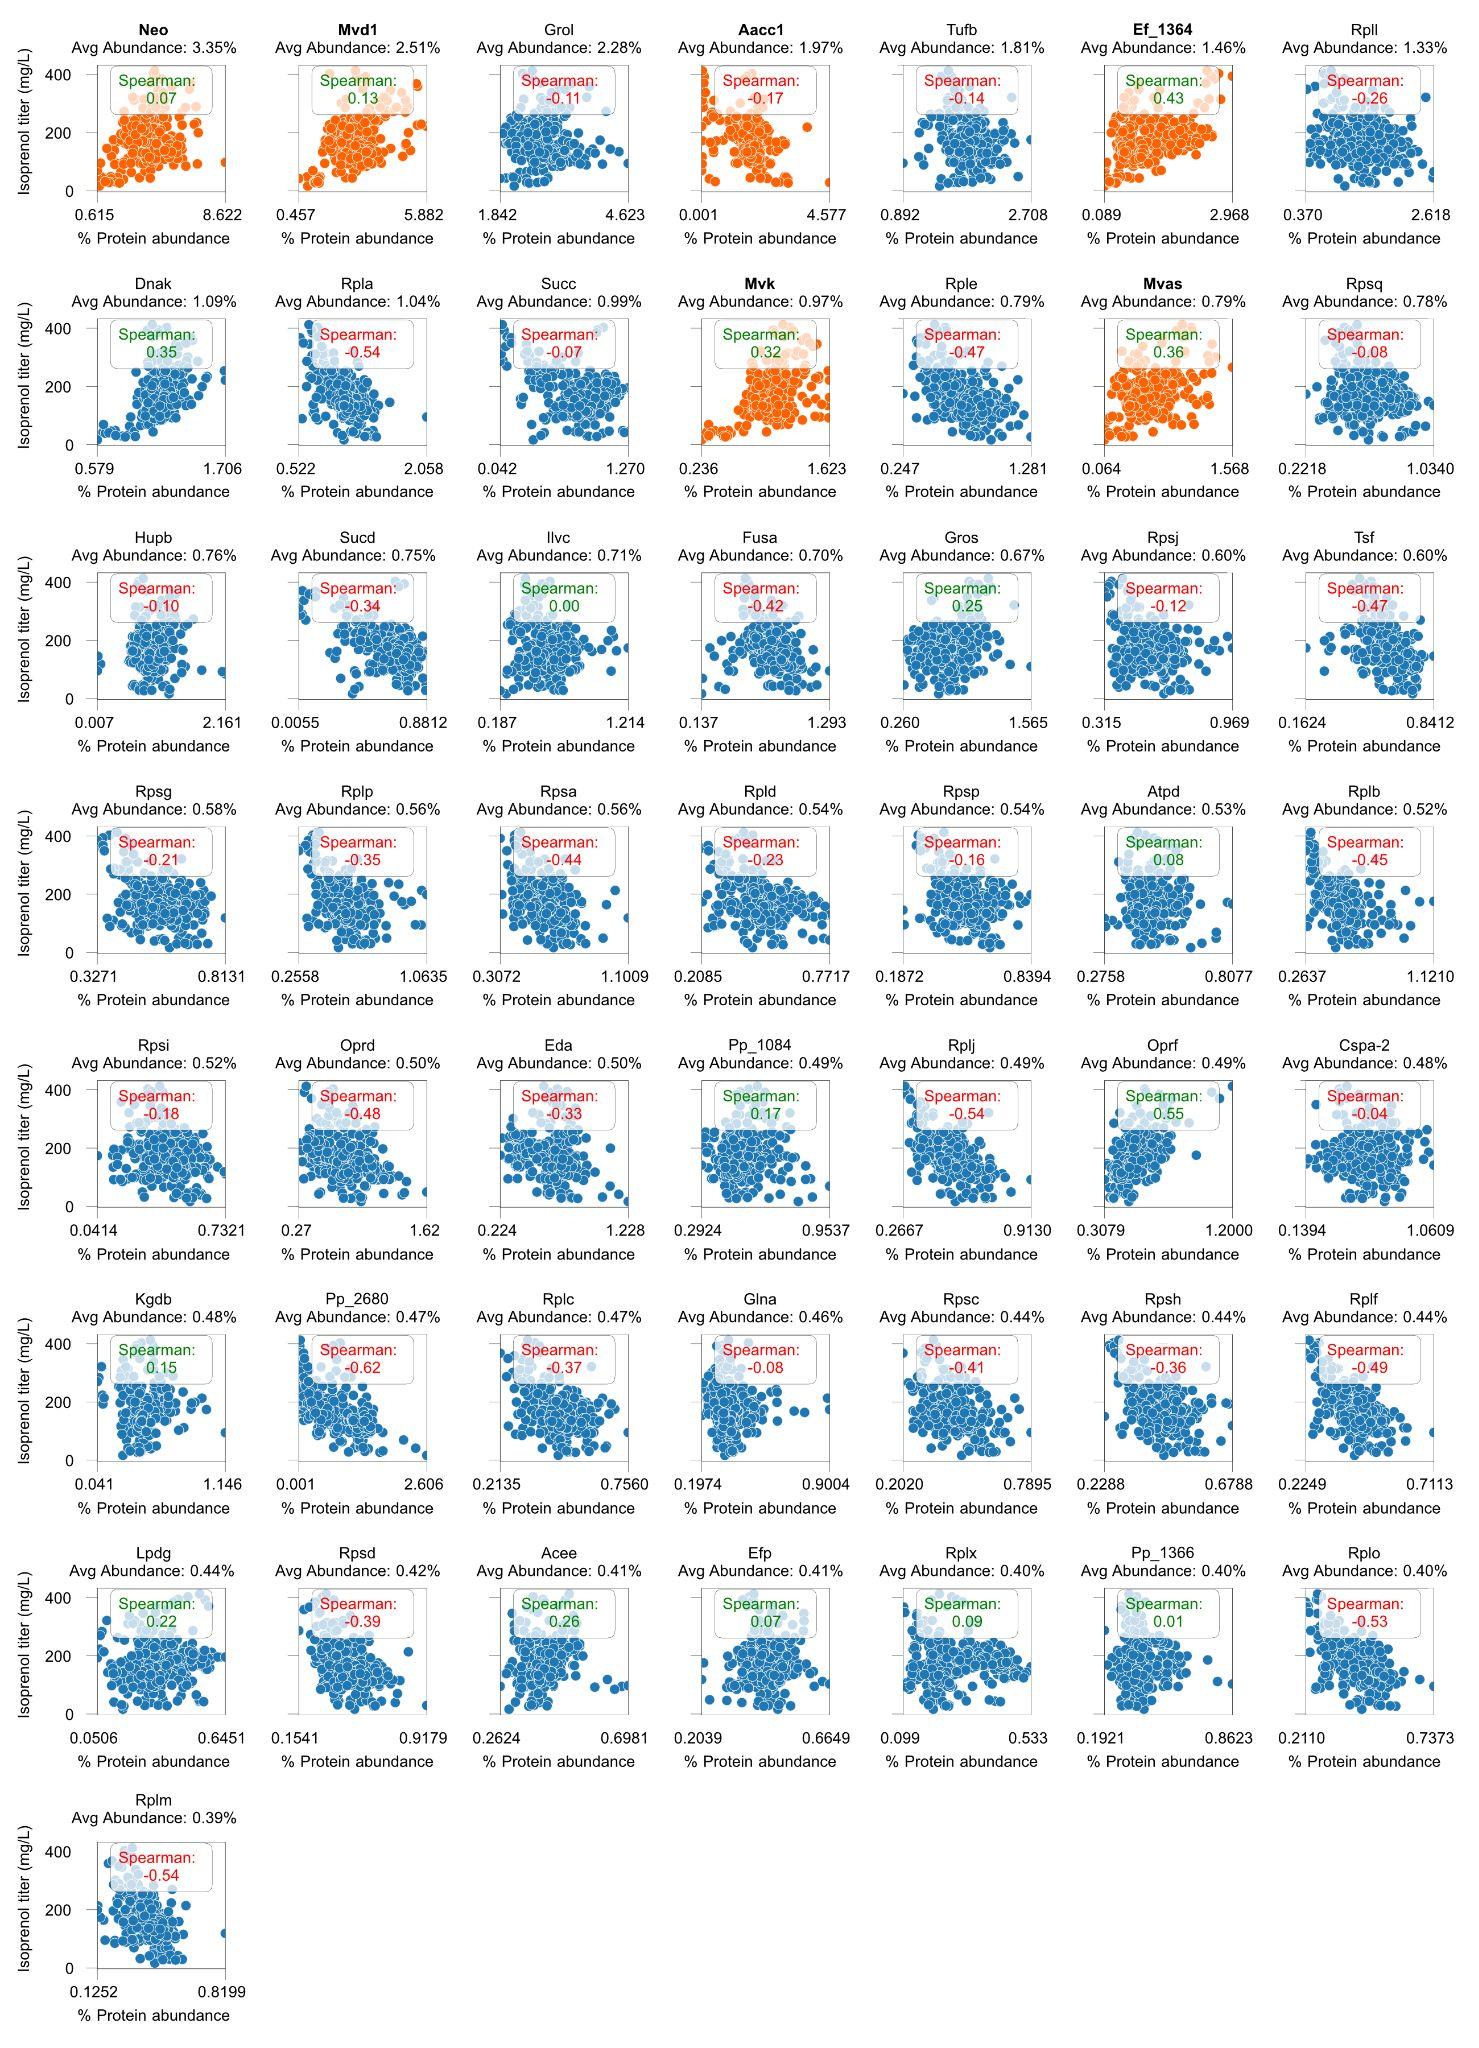
 **Fig. S13: Spearman rank correlation coefficients of the 50 most abundant proteins and isoprenol titer in DBTL0.** Pathway proteins as well as antibiotic resistance proteins (Neo and Aac1) are highlighted in orange. Pathway proteins typically had a weakly positive correlation with isoprenol titer. Meanwhile, many of the other most abundant proteins had negative correlations with isoprenol titer. In particular, Rpla, Rplb, Rplc, Rpld, Rple, and PP_2680 had moderately negative (-0.37 to -0.62) correlations.

# **Table S2:** sgRNA targets selected to investigate PP_0815 off-target effects.

| **#** | **Gene Target** | **Selection criteria** | **Function** |
| --- | --- | --- | --- |
| 1 | PP_0378 | Strongly downregulated | PQQ Biosynthesis; implicated in glucose and alcohol salvage proteins, improves fitness with growth on isoprenol |
| 2 | PP_0379 | Strongly downregulated | PQQ Biosynthesis; implicated in glucose and alcohol salvage proteins, improves fitness with growth on isoprenol |
| 3 | PP_0977 | Strongly downregulated, PP_0815 Stabl | Valine tRNA loading |
| 4 | PP_1018 | Strongly downregulated, PP_1017, PP_1019 also downregulated | Glucose transport |
| 5 | PP_2664 | Strongly downregulated, PP_2672, PP_2674 also downregulated | Regulatory protein in alcohol salvage cluster |
| 6 | PP_2665 | Strongly downregulated, PP_2672, PP_2674 also downregulated | Regulatory protein in alcohol salvage cluster, upregulates PQQ Biosynthesis |
| 7 | PP_2680 | Strongly downregulated | Alcohol/aldehyde salvage; PP_2675 used in isoprenol degradation |
| 8 | PP_3379 | Strongly downregulated, Global Stabl, PP_3378 also downregulated | Glycolysis; repressor also downregulated |
| 9 | PP_3416 | Strongly downregulated | Glycolysis (ED Pathway) |
| 10 | PP_0986 | Stabl for PP_0815 | Aminomethyltransferase |
| 11 | PP_1593 | Stabl for PP_0815 | Uridylate kinase |
| 12 | PP_1638 | Stabl for PP_0815 | Ferrodoxin-NADP+ reductase |
| 13 | PP_5313 | Stabl for PP_0815 | DNA-binding protein |
| 14 | PP_1982 | Strongly downregulated | Heat shock protein |

#

# **Table S3:** List of oligonucleotides used in this study. Where applicable, sgRNA sequences are underlined.

| **Name** | **Sequence (5’ to 3’)** |
| --- | --- |
| dCas9_chk_F | tccgcaagatgcagtgcatacg |
| dCas9_chk2_F | ttcttggtcgaaggcagcaagc |
| gRNA_Array_F | gtcagctaggaggtgactga |
| gRNA_Array_R | ggcaggctgacctaggtataaa |
| gRNA_Vector_F | tttatacctaggtcagcctgcc |
| gRNA_Vector_R | tcagtcacctcctagctgac |
| Linker7_R | agttcgagcctcaattgacataagc |
| Linker7_F | atctgtccgcttatcgatgagctc |
| Linker7_Insert_F | caattgaggctcgaacttttacgggtgccgactcactattacagacttactacaatctgtccgcttatcg |
| Linker7_Insert_R | cgataagcggacagattgtagtaagtctgtaatagtgagtcggcacccgtaaaagttcgagcctcaattg |
| PP_0368_F | gcgaatgcgtccgatcagacaa |
| PP_0368_R | acccagcagcagaaccaaggta |
| PP_0437_F | tgccaatgctcctccctgtgat |
| PP_0437_R | agtcgtcatagccattgcgcac |
| PP_0528_F | agttccagcccagctcttcgaa |
| PP_0528_R | caggccgaacagaaggtgcaaa |
| PP_0751_F | tgatcaagcgccaggcacaaaa |
| PP_0751_R | tggcaaacccaggtcctatgct |
| PP_0812_F | ttggtggtgctcagtgccattg |
| PP_0812_R | cgatcatggcaagcgtcaccat |
| PP_0813_F | ggcagcaaagatctggccacaa |
| PP_0813_R | agaacaggctcaggcagctcat |
| PP_0814_F | acttcttcgccacctccgttct |
| PP_0815_R | ggaagatcgcgatggcaaagct |
| PP_1317_F | tgccggggtaatcaccttgtca |
| PP_1317_R | tggttgaccagcaccagcaatg |
| PP_1506_F | tcctgcaactttgggacgcttg |
| PP_1506_R | ctgtgcggcctacaaacgacaa |
| PP_1769_F | acaaggtttcggctgacaacgg |
| PP_1769_R | gctgcatttaccactggtgcga |
| PP_2136_F | atacttccgactagcgcgctga |
| PP_2136_R | accttcaggaagccgttctcgt |
| PP_4120_F | gcgcctgtccgccaaattctat |
| PP_4120_R | acatcctggtcgtcagccttgt |
| PP_4189_F | aattcggtttcaggtgcgcgaa |
| PP_4189_R | actgcgtaaacgtttgcccgaa |
| PP_4191_F | aggaacggcttcaccttctcgt |
| PP_4191_R | acttcgtctggggtgtgcagat |
| PP_4192_F | aatgcgccgtcctggtttttca |
| PP_4192_R | tcatctccgtggtgctgatcgt |
| PP_0368_gRNA | aggtataatggatccgaatttctactgttgtagatacccccgattcgctccaggtgatttcaaataaaacgaaaggctcagtcgaaagac |
| PP_0437_gRNA | aggtataatggatccgaatttctactgttgtagatgaaacagctgcagcatctggaatttcaaataaaacgaaaggctcagtcgaaagac |
| PP_0528_gRNA | aggtataatggatccgaatttctactgttgtagatccgccgttcatcacgctgtagatttcaaataaaacgaaaggctcagtcgaaagac |
| PP_0751_gRNA | aggtataatggatccgaatttctactgttgtagatcttgagcttggcagcccaggcatttcaaataaaacgaaaggctcagtcgaaagac |
| PP_0812_gRNA | aggtataatggatccgaatttctactgttgtagatctcagtgggtgcaactggaccatttcaaataaaacgaaaggctcagtcgaaagac |
| PP_0813_gRNA | aggtataatggatccgaatttctactgttgtagatatgccaggtgcgcgcatcttcatttcaaataaaacgaaaggctcagtcgaaagac |
| PP_0814_gRNA | aggtataatggatccgaatttctactgttgtagatgtagctgttgaaacgctgttcatttcaaataaaacgaaaggctcagtcgaaagac |
| PP_0815_gRNA | aggtataatggatccgaatttctactgttgtagatcttcctgcacatggaccgctcatttcaaataaaacgaaaggctcagtcgaaagac |
| PP_1317_gRNA | aggtataatggatccgaatttctactgttgtagatccagtgccaaggcgaaagccgatttcaaataaaacgaaaggctcagtcgaaagac |
| PP_1506_gRNA | aggtataatggatccgaatttctactgttgtagatttcagctccaggcccagcgggatttcaaataaaacgaaaggctcagtcgaaagac |
| PP_1769_gRNA | aggtataatggatccgaatttctactgttgtagatcggtgaggtcgagctgcgtatatttcaaataaaacgaaaggctcagtcgaaagac |
| PP_2136_gRNA | aggtataatggatccgaatttctactgttgtagatccaagctggccaagacctctgatttcaaataaaacgaaaggctcagtcgaaagac |
| PP_4120_gRNA | aggtataatggatccgaatttctactgttgtagatcccatgaagatgttcttgtggatttcaaataaaacgaaaggctcagtcgaaagac |
| PP_4189_gRNA | aggtataatggatccgaatttctactgttgtagataggtggtaacgctgcatatgtatttcaaataaaacgaaaggctcagtcgaaagac |
| PP_4192_gRNA | aggtataatggatccgaatttctactgttgtagatctgttccaggcggtatgcggcatttcaaataaaacgaaaggctcagtcgaaagac |
| PP_419X_gRNA | aggtataatggatccgaatttctactgttgtagatcttgaccatggaacgggcaacatttcaaataaaacgaaaggctcagtcgaaagac |
| PP_0368_Repair | ccaagcgcgggtcaccccacagaactcacctagaggttcatcgcatactggcgctgtacccaaaacccgcctgccctgaccgggaggcgg |
| PP_0437_Repair | cagcccatggctatcatgcctgccttattccaagtcgagactggc atgattcttgagctcgattgcggtaacagcttcatcaagtggcgg |
| PP_0528_Repair | acagcttcacctatccctgtaggatcgggtttacccgcgaatgcgggcgaactggctgcccaacccttcgacgcggagccggaagcatga |
| PP_0751_Repair | cctatgctgtcaattaggtagctgtagattgtggagacgcgttaagccggtctgaaacgcaaaaacgcccctcggggcgttttttgtgcc |
| PP_0812_Repair | caaaacacaaattgcattgaagcaagctgatctagaggtcgtgaggagatgttcggtaaattaagcctggaggcgataccctatcacgag |
| PP_0813_Repair | gtggaatcgagtatgcaaccagctgccggtgcagaggagtaagagtcaatgtccagtcaagtaatgcacggcgctgctcatggtcacgac |
| PP_0814_Repair | ctgcctgccggcgcacgtgtcgaatcgtttgagcgggtgtaatcatggctaacgcacacgacactcatcacgaaggtaatcacggcagcg |
| PP_0815_Repair | ctggatctgcgtattcaccgtcgtttacctgctgggggttctgtaggtaagactgcatgtccgttaagcactttatccaaatcaccaaac |
| PP_1317_Repair | caggccaggtccaactggccaagcaagctgatgggagaggactgaatgagcaagttcatggactggattgatgctcgcttccccgccacc |
| PP_1506_Repair | tcgccgaatccattgaatttcatacaaaaatttgaggagcacaagtccggcgcctgacgcacctcgacaacggcccgcttgcgggccgtt |
| PP_1769_Repair | cggtagaagcgctggtaggctacatggctgaattcgagaaggagcttcaggggccttggggctgccttgcagcccttcgcgggcatgccc |
| PP_2136_Repair | cgatcggcgtgtacagttcagcttccatatcgtggagatcagttggcggtcaacgagctagagcgagagatttgatatgagcctgaatcc |
| PP_4120_Repair | ggtcgccgcaagcggcaagcgaagctgaaacaatgaggctttggctccagcgacctgccgcccgctcccgaaggagccggcggcctggct |
| PP_4189_Repair | gctgtggctctcgccgatcagtcccctaatcgagggtgaccaagccgccttcgcgcacctgaaaccgaatttaaggaaacacagataatg |
| PP_4191_Repair | gcttacttcgtctggggtgtgcagattctctggggtatctgatccgggtggctgctatgttgaaagtcgaagtttatcgttacaacccgg |
| PP_4192_Repair | tccatggctagcattccaaccatttccttcgacgccatcatcatcgatcgtcatctccgtggtgctgatcgttctggtgggagtttgggt |
| TEAM-1212 is "PP-1" | aatttcaaataaaacgaaaggctcagtcgaaag |
| TEAM-1213 is "PP-2 | atctacaacagtagaaattcggatccattatacctagg |
| TEAM-1904 | tttgcctggcggcagtagcg |
| PP_0812-15_Repair | caaaacacaaattgcattgaagcaagctgatctagaggtcgtgagggtaagactgcatgtccgttaagcactttatccaaatcaccaaac |
| PP_0378_CRISPRi_F | tctgggtctcttagccacgtggtacgggtgatggatggtttggagaccatcg |
| PP_0378_CRISPRi_R | cgatggtctccaaaccatccatcacccgtaccacgtggctaagagacccaga |
| PP_0379_CRISPRi_F | tctgggtctcttagctgtccgtgcaccacacctgatggtttggagaccatcg |
| PP_0379_CRISPRi_R | cgatggtctccaaaccatcaggtgtggtgcacggacagctaagagacccaga |
| PP_0977_CRISPRi_F | tctgggtctcttagcaccaggaagtttcgattgcgtggtttggagaccatcg |
| PP_0977_CRISPRi_R | cgatggtctccaaacctgttccgtcattccgttggttgctaagagacccaga |
| PP_0986_CRISPRi_F | tctgggtctcttagccgtgcacccagttccagatgcagtttggagaccatcg |
| PP_0986_CRISPRi_R | cgatggtctccaaactcgtatccttcaaaccccgttagctaagagacccaga |
| PP_1018_CRISPRi_F | tctgggtctcttagcgcttggcatcgaggttggacaggtttggagaccatcg |
| PP_1018_CRISPRi_R | cgatggtctccaaacatcaggttttgaacgcgattctgctaagagacccaga |
| PP_1593_CRISPRi_F | tctgggtctcttagctaatgatcggtgacacccaccagtttggagaccatcg |
| PP_1593_CRISPRi_R | cgatggtctccaaacctgtttcgcgaagccatccacagctaagagacccaga |
| PP_1638_CRISPRi_F | tctgggtctcttagcgctgaacagggtgtcgttccaggtttggagaccatcg |
| PP_1638_CRISPRi_R | cgatggtctccaaactggtggatatttccaaactcgagctaagagacccaga |
| PP_1982_CRISPRi_F | tctgggtctcttagcaaccaacggaatgacggaacaggtttggagaccatcg |
| PP_1982_CRISPRi_R | cgatggtctccaaaccacgcaatcgaaacttcctggtgctaagagacccaga |
| PP_2664_CRISPRi_F | tctgggtctcttagctcgagtttggaaatatccaccagtttggagaccatcg |
| PP_2664_CRISPRi_R | cgatggtctccaaacctggaacgacaccctgttcagcgctaagagacccaga |
| PP_2665_CRISPRi_F | tctgggtctcttagctgtggatggcttcgcgaaacaggtttggagaccatcg |
| PP_2665_CRISPRi_R | cgatggtctccaaactggtgggtgtcaccgatcattagctaagagacccaga |
| PP_2680_CRISPRi_F | tctgggtctcttagctaacggggtttgaaggatacgagtttggagaccatcg |
| PP_2680_CRISPRi_R | cgatggtctccaaactgcatctggaactgggtgcacggctaagagacccaga |
| PP_3379_CRISPRi_F | tctgggtctcttagctggccacgttggcgcacaaagtgtttggagaccatcg |
| PP_3379_CRISPRi_R | cgatggtctccaaactggtgaagagttgcaagccaccgctaagagacccaga |
| PP_3416_CRISPRi_F | tctgggtctcttagcggtggcttgcaactcttcaccagtttggagaccatcg |
| PP_3416_CRISPRi_R | cgatggtctccaaacactttgtgcgccaacgtggccagctaagagacccaga |
| PP_5313_CRISPRi_F | tctgggtctcttagcagaatcgcgttcaaaacctgatgtttggagaccatcg |
| PP_5313_CRISPRi_R | cgatggtctccaaacctgtccaacctcgatgccaagcgctaagagacccaga |

#

# **Table S4:** List of plasmids used in this study outside of DBTL1-6.

| **Plasmid** | **JBEI Accession No.** | **Plasmid Description** | **Ref** |
| --- | --- | --- | --- |
| pIY670 | JBx_264945 | pRK2-Kan-araC-PBAD-MvaSEf-MvaEEf-TrpoH-Ptrc1-O-MKMm-PMDScHKQ-AphA | [**2**](https://sciwheel.com/work/citation?ids=16100003&pre=&suf=&sa=0) |
| pIY989 | JBx_249165 | pRSF1010-Gm-NagR-pNagAa-dCas9-thrLABC-sfGFP | [**1**](https://sciwheel.com/work/citation?ids=17798601&pre=&suf=&sa=0) |
| pIY1006 | JBx_249575 | pRSF1010-Gm-NagR-pNagAa-dCas9-thrLABC-nontarget | [**1**](https://sciwheel.com/work/citation?ids=17798601&pre=&suf=&sa=0) |
| pDBTL3-6_Vector | JBx_273384 | pRSF1010-Gm-L7-NagR-pNagAa-dCas9-thrLABC-sfGFP | This study |
| pIY1293 | JBx_249775 | pRSF1010-Gm-NagR-pNagAa-dCas9-thrLABC-PP_0001 | [**1**](https://sciwheel.com/work/citation?ids=17798601&pre=&suf=&sa=0) |
| pIY1297 | JBx_249783 | pRSF1010-Gm-NagR-pNagAa-dCas9-thrLABC-PP_0103 | [**1**](https://sciwheel.com/work/citation?ids=17798601&pre=&suf=&sa=0) |
| pIY1298 | JBx_249785 | pRSF1010-Gm-NagR-pNagAa-dCas9-thrLABC-PP_0104 | [**1**](https://sciwheel.com/work/citation?ids=17798601&pre=&suf=&sa=0) |
| pIY1299 | JBx_249787 | pRSF1010-Gm-NagR-pNagAa-dCas9-thrLABC-PP_0105 | [**1**](https://sciwheel.com/work/citation?ids=17798601&pre=&suf=&sa=0) |
| pIY1300 | JBx_249789 | pRSF1010-Gm-NagR-pNagAa-dCas9-thrLABC-PP_0106 | [**1**](https://sciwheel.com/work/citation?ids=17798601&pre=&suf=&sa=0) |
| pIY1271 | JBx_249731 | pRSF1010-Gm-NagR-pNagAa-dCas9-thrLABC-PP_0168 | [**1**](https://sciwheel.com/work/citation?ids=17798601&pre=&suf=&sa=0) |
| pIY1476 | JBx_249845 | pRSF1010-Gm-NagR-pNagAa-dCas9-thrLABC-PP_0225 | [**1**](https://sciwheel.com/work/citation?ids=17798601&pre=&suf=&sa=0) |
| pIY1475 | JBx_249843 | pRSF1010-Gm-NagR-pNagAa-dCas9-thrLABC-PP_0226 | [**1**](https://sciwheel.com/work/citation?ids=17798601&pre=&suf=&sa=0) |
| pIY1100 | JBx_249621 | pRSF1010-Gm-NagR-pNagAa-dCas9-thrLABC-PP_0338 | [**1**](https://sciwheel.com/work/citation?ids=17798601&pre=&suf=&sa=0) |
| pIY1072 | JBx_249599 | pRSF1010-Gm-NagR-pNagAa-dCas9-thrLABC-PP_0362 | [**1**](https://sciwheel.com/work/citation?ids=17798601&pre=&suf=&sa=0) |
| pIY1065 | JBx_249585 | pRSF1010-Gm-NagR-pNagAa-dCas9-thrLABC-PP_0368 | [**1**](https://sciwheel.com/work/citation?ids=17798601&pre=&suf=&sa=0) |
| pIY1073 | JBx_249601 | pRSF1010-Gm-NagR-pNagAa-dCas9-thrLABC-PP_0437 | [**1**](https://sciwheel.com/work/citation?ids=17798601&pre=&suf=&sa=0) |
| pIY1134 | JBx_249677 | pRSF1010-Gm-NagR-pNagAa-dCas9-thrLABC-PP_0528 | [**1**](https://sciwheel.com/work/citation?ids=17798601&pre=&suf=&sa=0) |
| pIY1135 | JBx_249679 | pRSF1010-Gm-NagR-pNagAa-dCas9-thrLABC-PP_0548 | [**1**](https://sciwheel.com/work/citation?ids=17798601&pre=&suf=&sa=0) |
| pIY1103 | JBx_249627 | pRSF1010-Gm-NagR-pNagAa-dCas9-thrLABC-PP_0582 | [**1**](https://sciwheel.com/work/citation?ids=17798601&pre=&suf=&sa=0) |
| pIY1116 | JBx_249653 | pRSF1010-Gm-NagR-pNagAa-dCas9-thrLABC-PP_0597 | [**1**](https://sciwheel.com/work/citation?ids=17798601&pre=&suf=&sa=0) |
| pIY1486 | JBx_249865 | pRSF1010-Gm-NagR-pNagAa-dCas9-thrLABC-PP_0654 | [**1**](https://sciwheel.com/work/citation?ids=17798601&pre=&suf=&sa=0) |
| pIY1468 | JBx_249829 | pRSF1010-Gm-NagR-pNagAa-dCas9-thrLABC-PP_0658 | [**1**](https://sciwheel.com/work/citation?ids=17798601&pre=&suf=&sa=0) |
| pIY1292 | JBx_249773 | pRSF1010-Gm-NagR-pNagAa-dCas9-thrLABC-PP_0691 | [**1**](https://sciwheel.com/work/citation?ids=17798601&pre=&suf=&sa=0) |
| pIY1487 | JBx_249867 | pRSF1010-Gm-NagR-pNagAa-dCas9-thrLABC-PP_0751 | [**1**](https://sciwheel.com/work/citation?ids=17798601&pre=&suf=&sa=0) |
| pIY1071 | JBx_249597 | pRSF1010-Gm-NagR-pNagAa-dCas9-thrLABC-PP_0774 | [**1**](https://sciwheel.com/work/citation?ids=17798601&pre=&suf=&sa=0) |
| pIY1270 | JBx_249729 | pRSF1010-Gm-NagR-pNagAa-dCas9-thrLABC-PP_0806 | [**1**](https://sciwheel.com/work/citation?ids=17798601&pre=&suf=&sa=0) |
| pIY1452 | JBx_249797 | pRSF1010-Gm-NagR-pNagAa-dCas9-thrLABC-PP_0812 | [**1**](https://sciwheel.com/work/citation?ids=17798601&pre=&suf=&sa=0) |
| pIY1453 | JBx_249799 | pRSF1010-Gm-NagR-pNagAa-dCas9-thrLABC-PP_0813 | [**1**](https://sciwheel.com/work/citation?ids=17798601&pre=&suf=&sa=0) |
| pIY1454 | JBx_249801 | pRSF1010-Gm-NagR-pNagAa-dCas9-thrLABC-PP_0814 | [**1**](https://sciwheel.com/work/citation?ids=17798601&pre=&suf=&sa=0) |
| pIY1455 | JBx_249803 | pRSF1010-Gm-NagR-pNagAa-dCas9-thrLABC-PP_0815 | [**1**](https://sciwheel.com/work/citation?ids=17798601&pre=&suf=&sa=0) |
| pIY1483 | JBx_249859 | pRSF1010-Gm-NagR-pNagAa-dCas9-thrLABC-PP_0897 | [**1**](https://sciwheel.com/work/citation?ids=17798601&pre=&suf=&sa=0) |
| pIY1484 | JBx_249861 | pRSF1010-Gm-NagR-pNagAa-dCas9-thrLABC-PP_0944 | [**1**](https://sciwheel.com/work/citation?ids=17798601&pre=&suf=&sa=0) |
| pIY1282 | JBx_249753 | pRSF1010-Gm-NagR-pNagAa-dCas9-thrLABC-PP_0999 | [**1**](https://sciwheel.com/work/citation?ids=17798601&pre=&suf=&sa=0) |
| pIY1456 | JBx_249805 | pRSF1010-Gm-NagR-pNagAa-dCas9-thrLABC-PP_1023 | [**1**](https://sciwheel.com/work/citation?ids=17798601&pre=&suf=&sa=0) |
| pIY1283 | JBx_249755 | pRSF1010-Gm-NagR-pNagAa-dCas9-thrLABC-PP_1031 | [**1**](https://sciwheel.com/work/citation?ids=17798601&pre=&suf=&sa=0) |
| pIY1108 | JBx_249637 | pRSF1010-Gm-NagR-pNagAa-dCas9-thrLABC-PP_1157 | [**1**](https://sciwheel.com/work/citation?ids=17798601&pre=&suf=&sa=0) |
| pIY1457 | JBx_249807 | pRSF1010-Gm-NagR-pNagAa-dCas9-thrLABC-PP_1240 | [**1**](https://sciwheel.com/work/citation?ids=17798601&pre=&suf=&sa=0) |
| pIY1489 | JBx_249871 | pRSF1010-Gm-NagR-pNagAa-dCas9-thrLABC-PP_1251 | [**1**](https://sciwheel.com/work/citation?ids=17798601&pre=&suf=&sa=0) |
| pIY1301 | JBx_249791 | pRSF1010-Gm-NagR-pNagAa-dCas9-thrLABC-PP_1317 | [**1**](https://sciwheel.com/work/citation?ids=17798601&pre=&suf=&sa=0) |
| pIY1302 | JBx_249793 | pRSF1010-Gm-NagR-pNagAa-dCas9-thrLABC-PP_1318 | [**1**](https://sciwheel.com/work/citation?ids=17798601&pre=&suf=&sa=0) |
| pIY1209 | JBx_249713 | pRSF1010-Gm-NagR-pNagAa-dCas9-thrLABC-PP_1319 | [**1**](https://sciwheel.com/work/citation?ids=17798601&pre=&suf=&sa=0) |
| pIY1451 | JBx_249795 | pRSF1010-Gm-NagR-pNagAa-dCas9-thrLABC-PP_1319 | [**1**](https://sciwheel.com/work/citation?ids=17798601&pre=&suf=&sa=0) |
| pIY1109 | JBx_249639 | pRSF1010-Gm-NagR-pNagAa-dCas9-thrLABC-PP_1394 | [**1**](https://sciwheel.com/work/citation?ids=17798601&pre=&suf=&sa=0) |
| pIY1099 | JBx_249619 | pRSF1010-Gm-NagR-pNagAa-dCas9-thrLABC-PP_1444 | [**1**](https://sciwheel.com/work/citation?ids=17798601&pre=&suf=&sa=0) |
| pIY1472 | JBx_249837 | pRSF1010-Gm-NagR-pNagAa-dCas9-thrLABC-PP_1457 | [**1**](https://sciwheel.com/work/citation?ids=17798601&pre=&suf=&sa=0) |
| pIY1469 | JBx_249831 | pRSF1010-Gm-NagR-pNagAa-dCas9-thrLABC-PP_1506 | [**1**](https://sciwheel.com/work/citation?ids=17798601&pre=&suf=&sa=0) |
| pIY1078 | JBx_249611 | pRSF1010-Gm-NagR-pNagAa-dCas9-thrLABC-PP_1607_NT1 | [**1**](https://sciwheel.com/work/citation?ids=17798601&pre=&suf=&sa=0) |
| pIY1079 | JBx_249613 | pRSF1010-Gm-NagR-pNagAa-dCas9-thrLABC-PP_1607_NT2 | [**1**](https://sciwheel.com/work/citation?ids=17798601&pre=&suf=&sa=0) |
| pIY1080 | JBx_249615 | pRSF1010-Gm-NagR-pNagAa-dCas9-thrLABC-PP_1607_NT3 | [**1**](https://sciwheel.com/work/citation?ids=17798601&pre=&suf=&sa=0) |
| pIY1081 | JBx_249617 | pRSF1010-Gm-NagR-pNagAa-dCas9-thrLABC-PP_1607_NT4 | [**1**](https://sciwheel.com/work/citation?ids=17798601&pre=&suf=&sa=0) |
| pIY1463 | JBx_249819 | pRSF1010-Gm-NagR-pNagAa-dCas9-thrLABC-PP_1610 | [**1**](https://sciwheel.com/work/citation?ids=17798601&pre=&suf=&sa=0) |
| pIY1470 | JBx_249833 | pRSF1010-Gm-NagR-pNagAa-dCas9-thrLABC-PP_1620 | [**1**](https://sciwheel.com/work/citation?ids=17798601&pre=&suf=&sa=0) |
| pIY1285 | JBx_249759 | pRSF1010-Gm-NagR-pNagAa-dCas9-thrLABC-PP_1664 | [**1**](https://sciwheel.com/work/citation?ids=17798601&pre=&suf=&sa=0) |
| pIY1485 | JBx_249863 | pRSF1010-Gm-NagR-pNagAa-dCas9-thrLABC-PP_1755 | [**1**](https://sciwheel.com/work/citation?ids=17798601&pre=&suf=&sa=0) |
| pIY1461 | JBx_249815 | pRSF1010-Gm-NagR-pNagAa-dCas9-thrLABC-PP_1769 | [**1**](https://sciwheel.com/work/citation?ids=17798601&pre=&suf=&sa=0) |
| pIY1284 | JBx_249757 | pRSF1010-Gm-NagR-pNagAa-dCas9-thrLABC-PP_1770 | [**1**](https://sciwheel.com/work/citation?ids=17798601&pre=&suf=&sa=0) |
| pIY1113 | JBx_249647 | pRSF1010-Gm-NagR-pNagAa-dCas9-thrLABC-PP_1777 | [**1**](https://sciwheel.com/work/citation?ids=17798601&pre=&suf=&sa=0) |
| pIY1460 | JBx_249813 | pRSF1010-Gm-NagR-pNagAa-dCas9-thrLABC-PP_2095 | [**1**](https://sciwheel.com/work/citation?ids=17798601&pre=&suf=&sa=0) |
| pIY1490 | JBx_249873 | pRSF1010-Gm-NagR-pNagAa-dCas9-thrLABC-PP_2112 | [**1**](https://sciwheel.com/work/citation?ids=17798601&pre=&suf=&sa=0) |
| pIY1067 | JBx_249589 | pRSF1010-Gm-NagR-pNagAa-dCas9-thrLABC-PP_2136 | [**1**](https://sciwheel.com/work/citation?ids=17798601&pre=&suf=&sa=0) |
| pIY1126 | JBx_249661 | pRSF1010-Gm-NagR-pNagAa-dCas9-thrLABC-PP_2137 | [**1**](https://sciwheel.com/work/citation?ids=17798601&pre=&suf=&sa=0) |
| pIY1131 | JBx_249671 | pRSF1010-Gm-NagR-pNagAa-dCas9-thrLABC-PP_2213 | [**1**](https://sciwheel.com/work/citation?ids=17798601&pre=&suf=&sa=0) |
| pIY1491 | JBx_249875 | pRSF1010-Gm-NagR-pNagAa-dCas9-thrLABC-PP_2339 | [**1**](https://sciwheel.com/work/citation?ids=17798601&pre=&suf=&sa=0) |
| pIY1128 | JBx_249665 | pRSF1010-Gm-NagR-pNagAa-dCas9-thrLABC-PP_2471 | [**1**](https://sciwheel.com/work/citation?ids=17798601&pre=&suf=&sa=0) |
| pIY1074 | JBx_249603 | pRSF1010-Gm-NagR-pNagAa-dCas9-thrLABC-PP_2589 | [**1**](https://sciwheel.com/work/citation?ids=17798601&pre=&suf=&sa=0) |
| pIY1488 | JBx_249869 | pRSF1010-Gm-NagR-pNagAa-dCas9-thrLABC-PP_2925 | [**1**](https://sciwheel.com/work/citation?ids=17798601&pre=&suf=&sa=0) |
| pIY1102 | JBx_249625 | pRSF1010-Gm-NagR-pNagAa-dCas9-thrLABC-PP_3071 | [**1**](https://sciwheel.com/work/citation?ids=17798601&pre=&suf=&sa=0) |
| pIY1124 | JBx_249657 | pRSF1010-Gm-NagR-pNagAa-dCas9-thrLABC-PP_3122 | [**1**](https://sciwheel.com/work/citation?ids=17798601&pre=&suf=&sa=0) |
| pIY1125 | JBx_249659 | pRSF1010-Gm-NagR-pNagAa-dCas9-thrLABC-PP_3123 | [**1**](https://sciwheel.com/work/citation?ids=17798601&pre=&suf=&sa=0) |
| pIY1127 | JBx_249663 | pRSF1010-Gm-NagR-pNagAa-dCas9-thrLABC-PP_3280 | [**1**](https://sciwheel.com/work/citation?ids=17798601&pre=&suf=&sa=0) |
| pIY1106 | JBx_249633 | pRSF1010-Gm-NagR-pNagAa-dCas9-thrLABC-PP_3282 | [**1**](https://sciwheel.com/work/citation?ids=17798601&pre=&suf=&sa=0) |
| pIY1104 | JBx_249629 | pRSF1010-Gm-NagR-pNagAa-dCas9-thrLABC-PP_3355 | [**1**](https://sciwheel.com/work/citation?ids=17798601&pre=&suf=&sa=0) |
| pIY1101 | JBx_249623 | pRSF1010-Gm-NagR-pNagAa-dCas9-thrLABC-PP_3394 | [**1**](https://sciwheel.com/work/citation?ids=17798601&pre=&suf=&sa=0) |
| pIY1114 | JBx_249649 | pRSF1010-Gm-NagR-pNagAa-dCas9-thrLABC-PP_3578 | [**1**](https://sciwheel.com/work/citation?ids=17798601&pre=&suf=&sa=0) |
| pIY1075 | JBx_249605 | pRSF1010-Gm-NagR-pNagAa-dCas9-thrLABC-PP_3744 | [**1**](https://sciwheel.com/work/citation?ids=17798601&pre=&suf=&sa=0) |
| pIY1105 | JBx_249631 | pRSF1010-Gm-NagR-pNagAa-dCas9-thrLABC-PP_3754 | [**1**](https://sciwheel.com/work/citation?ids=17798601&pre=&suf=&sa=0) |
| pIY1107 | JBx_249635 | pRSF1010-Gm-NagR-pNagAa-dCas9-thrLABC-PP_3755 | [**1**](https://sciwheel.com/work/citation?ids=17798601&pre=&suf=&sa=0) |
| pIY1492 | JBx_249877 | pRSF1010-Gm-NagR-pNagAa-dCas9-thrLABC-PP_4011 | [**1**](https://sciwheel.com/work/citation?ids=17798601&pre=&suf=&sa=0) |
| pIY1493 | JBx_249879 | pRSF1010-Gm-NagR-pNagAa-dCas9-thrLABC-PP_4012 | [**1**](https://sciwheel.com/work/citation?ids=17798601&pre=&suf=&sa=0) |
| pIY1295 | JBx_249779 | pRSF1010-Gm-NagR-pNagAa-dCas9-thrLABC-PP_4043 | [**1**](https://sciwheel.com/work/citation?ids=17798601&pre=&suf=&sa=0) |
| pIY1294 | JBx_249777 | pRSF1010-Gm-NagR-pNagAa-dCas9-thrLABC-PP_4116 | [**1**](https://sciwheel.com/work/citation?ids=17798601&pre=&suf=&sa=0) |
| pIY1273 | JBx_249735 | pRSF1010-Gm-NagR-pNagAa-dCas9-thrLABC-PP_4119 | [**1**](https://sciwheel.com/work/citation?ids=17798601&pre=&suf=&sa=0) |
| pIY1274 | JBx_249737 | pRSF1010-Gm-NagR-pNagAa-dCas9-thrLABC-PP_4120 | [**1**](https://sciwheel.com/work/citation?ids=17798601&pre=&suf=&sa=0) |
| pIY1275 | JBx_249739 | pRSF1010-Gm-NagR-pNagAa-dCas9-thrLABC-PP_4121 | [**1**](https://sciwheel.com/work/citation?ids=17798601&pre=&suf=&sa=0) |
| pIY1276 | JBx_249741 | pRSF1010-Gm-NagR-pNagAa-dCas9-thrLABC-PP_4122 | [**1**](https://sciwheel.com/work/citation?ids=17798601&pre=&suf=&sa=0) |
| pIY1277 | JBx_249743 | pRSF1010-Gm-NagR-pNagAa-dCas9-thrLABC-PP_4123 | [**1**](https://sciwheel.com/work/citation?ids=17798601&pre=&suf=&sa=0) |
| pIY1281 | JBx_249751 | pRSF1010-Gm-NagR-pNagAa-dCas9-thrLABC-PP_4128 | [**1**](https://sciwheel.com/work/citation?ids=17798601&pre=&suf=&sa=0) |
| pIY1280 | JBx_249749 | pRSF1010-Gm-NagR-pNagAa-dCas9-thrLABC-PP_4130 | [**1**](https://sciwheel.com/work/citation?ids=17798601&pre=&suf=&sa=0) |
| pIY1467 | JBx_249827 | pRSF1010-Gm-NagR-pNagAa-dCas9-thrLABC-PP_4159 | [**1**](https://sciwheel.com/work/citation?ids=17798601&pre=&suf=&sa=0) |
| pIY1466 | JBx_249825 | pRSF1010-Gm-NagR-pNagAa-dCas9-thrLABC-PP_4160 | [**1**](https://sciwheel.com/work/citation?ids=17798601&pre=&suf=&sa=0) |
| pIY1465 | JBx_249823 | pRSF1010-Gm-NagR-pNagAa-dCas9-thrLABC-PP_4161 | [**1**](https://sciwheel.com/work/citation?ids=17798601&pre=&suf=&sa=0) |
| pIY1287 | JBx_249763 | pRSF1010-Gm-NagR-pNagAa-dCas9-thrLABC-PP_4174 | [**1**](https://sciwheel.com/work/citation?ids=17798601&pre=&suf=&sa=0) |
| pIY1286 | JBx_249761 | pRSF1010-Gm-NagR-pNagAa-dCas9-thrLABC-PP_4175 | [**1**](https://sciwheel.com/work/citation?ids=17798601&pre=&suf=&sa=0) |
| pIY1494 | JBx_249881 | pRSF1010-Gm-NagR-pNagAa-dCas9-thrLABC-PP_4185 | [**1**](https://sciwheel.com/work/citation?ids=17798601&pre=&suf=&sa=0) |
| pIY1495 | JBx_249883 | pRSF1010-Gm-NagR-pNagAa-dCas9-thrLABC-PP_4186 | [**1**](https://sciwheel.com/work/citation?ids=17798601&pre=&suf=&sa=0) |
| pIY1290 | JBx_249769 | pRSF1010-Gm-NagR-pNagAa-dCas9-thrLABC-PP_4187 | [**1**](https://sciwheel.com/work/citation?ids=17798601&pre=&suf=&sa=0) |
| pIY1289 | JBx_249767 | [pRSF1010-Gm-NagR-pNagAa-dCas9-thrLABC-PP_4188](https://benchling.com/s/seq-RaPbQ1MXztrauyFZnPjI?m=slm-CpSH4Pm4LW2QdGdBxfi9) | [**1**](https://sciwheel.com/work/citation?ids=17798601&pre=&suf=&sa=0) |
| pIY1288 | JBx_249765 | pRSF1010-Gm-NagR-pNagAa-dCas9-thrLABC-PP_4189 | [**1**](https://sciwheel.com/work/citation?ids=17798601&pre=&suf=&sa=0) |
| pIY1481 | JBx_249855 | pRSF1010-Gm-NagR-pNagAa-dCas9-thrLABC-PP_4191 | [**1**](https://sciwheel.com/work/citation?ids=17798601&pre=&suf=&sa=0) |
| pIY1480 | JBx_249853 | pRSF1010-Gm-NagR-pNagAa-dCas9-thrLABC-PP_4192 | [**1**](https://sciwheel.com/work/citation?ids=17798601&pre=&suf=&sa=0) |
| pIY1479 | JBx_249851 | pRSF1010-Gm-NagR-pNagAa-dCas9-thrLABC-PP_4193 | [**1**](https://sciwheel.com/work/citation?ids=17798601&pre=&suf=&sa=0) |
| pIY1004 | JBx_249571 | pRSF1010-Gm-NagR-pNagAa-dCas9-thrLABC-PP_4194_NT1 | [**1**](https://sciwheel.com/work/citation?ids=17798601&pre=&suf=&sa=0) |
| pIY1076 | JBx_249607 | pRSF1010-Gm-NagR-pNagAa-dCas9-thrLABC-PP_4194_NT2 | [**1**](https://sciwheel.com/work/citation?ids=17798601&pre=&suf=&sa=0) |
| pIY1077 | JBx_249609 | pRSF1010-Gm-NagR-pNagAa-dCas9-thrLABC-PP_4194_NT3 | [**1**](https://sciwheel.com/work/citation?ids=17798601&pre=&suf=&sa=0) |
| pIY1471 | JBx_249835 | pRSF1010-Gm-NagR-pNagAa-dCas9-thrLABC-PP_4266 | [**1**](https://sciwheel.com/work/citation?ids=17798601&pre=&suf=&sa=0) |
| pIY1132 | JBx_249673 | pRSF1010-Gm-NagR-pNagAa-dCas9-thrLABC-PP_4487 | [**1**](https://sciwheel.com/work/citation?ids=17798601&pre=&suf=&sa=0) |
| pIY1063 | JBx_249581 | pRSF1010-Gm-NagR-pNagAa-dCas9-thrLABC-PP_4549 | [**1**](https://sciwheel.com/work/citation?ids=17798601&pre=&suf=&sa=0) |
| pIY1064 | JBx_249583 | pRSF1010-Gm-NagR-pNagAa-dCas9-thrLABC-PP_4550 | [**1**](https://sciwheel.com/work/citation?ids=17798601&pre=&suf=&sa=0) |
| pIY1462 | JBx_249817 | pRSF1010-Gm-NagR-pNagAa-dCas9-thrLABC-PP_4635 | [**1**](https://sciwheel.com/work/citation?ids=17798601&pre=&suf=&sa=0) |
| pIY1136 | JBx_249681 | pRSF1010-Gm-NagR-pNagAa-dCas9-thrLABC-PP_4636 | [**1**](https://sciwheel.com/work/citation?ids=17798601&pre=&suf=&sa=0) |
| pIY1478 | JBx_249849 | pRSF1010-Gm-NagR-pNagAa-dCas9-thrLABC-PP_4650 | [**1**](https://sciwheel.com/work/citation?ids=17798601&pre=&suf=&sa=0) |
| pIY1477 | JBx_249847 | pRSF1010-Gm-NagR-pNagAa-dCas9-thrLABC-PP_4651 | [**1**](https://sciwheel.com/work/citation?ids=17798601&pre=&suf=&sa=0) |
| pIY1117 | JBx_249655 | pRSF1010-Gm-NagR-pNagAa-dCas9-thrLABC-PP_4667 | [**1**](https://sciwheel.com/work/citation?ids=17798601&pre=&suf=&sa=0) |
| pIY1112 | JBx_249645 | pRSF1010-Gm-NagR-pNagAa-dCas9-thrLABC-PP_4678 | [**1**](https://sciwheel.com/work/citation?ids=17798601&pre=&suf=&sa=0) |
| pIY1111 | JBx_249643 | pRSF1010-Gm-NagR-pNagAa-dCas9-thrLABC-PP_4679 | [**1**](https://sciwheel.com/work/citation?ids=17798601&pre=&suf=&sa=0) |
| pIY1133 | JBx_249675 | pRSF1010-Gm-NagR-pNagAa-dCas9-thrLABC-PP_4702 | [**1**](https://sciwheel.com/work/citation?ids=17798601&pre=&suf=&sa=0) |
| pIY1129 | JBx_249667 | pRSF1010-Gm-NagR-pNagAa-dCas9-thrLABC-PP_4737 | [**1**](https://sciwheel.com/work/citation?ids=17798601&pre=&suf=&sa=0) |
| pIY1296 | JBx_249781 | pRSF1010-Gm-NagR-pNagAa-dCas9-thrLABC-PP_4862 | [**1**](https://sciwheel.com/work/citation?ids=17798601&pre=&suf=&sa=0) |
| pIY1130 | JBx_249669 | pRSF1010-Gm-NagR-pNagAa-dCas9-thrLABC-PP_4894 | [**1**](https://sciwheel.com/work/citation?ids=17798601&pre=&suf=&sa=0) |
| pIY1459 | JBx_249811 | pRSF1010-Gm-NagR-pNagAa-dCas9-thrLABC-PP_5064 | [**1**](https://sciwheel.com/work/citation?ids=17798601&pre=&suf=&sa=0) |
| pIY1458 | JBx_249809 | pRSF1010-Gm-NagR-pNagAa-dCas9-thrLABC-PP_5128 | [**1**](https://sciwheel.com/work/citation?ids=17798601&pre=&suf=&sa=0) |
| pIY1464 | JBx_249821 | pRSF1010-Gm-NagR-pNagAa-dCas9-thrLABC-PP_5186 | [**1**](https://sciwheel.com/work/citation?ids=17798601&pre=&suf=&sa=0) |
| pIY1473 | JBx_249839 | pRSF1010-Gm-NagR-pNagAa-dCas9-thrLABC-PP_5203 | [**1**](https://sciwheel.com/work/citation?ids=17798601&pre=&suf=&sa=0) |
| pIY1115 | JBx_249651 | pRSF1010-Gm-NagR-pNagAa-dCas9-thrLABC-PP_5288 | [**1**](https://sciwheel.com/work/citation?ids=17798601&pre=&suf=&sa=0) |
| pIY1272 | JBx_249733 | pRSF1010-Gm-NagR-pNagAa-dCas9-thrLABC-PP_5335 | [**1**](https://sciwheel.com/work/citation?ids=17798601&pre=&suf=&sa=0) |
| pIY1269 | JBx_249727 | pRSF1010-Gm-NagR-pNagAa-dCas9-thrLABC-PP_5416 | [**1**](https://sciwheel.com/work/citation?ids=17798601&pre=&suf=&sa=0) |
| pIY1268 | JBx_249725 | pRSF1010-Gm-NagR-pNagAa-dCas9-thrLABC-PP_5417 | [**1**](https://sciwheel.com/work/citation?ids=17798601&pre=&suf=&sa=0) |
| pIY1267 | JBx_249723 | pRSF1010-Gm-NagR-pNagAa-dCas9-thrLABC-PP_5419 | [**1**](https://sciwheel.com/work/citation?ids=17798601&pre=&suf=&sa=0) |
| pIY1266 | JBx_249721 | pRSF1010-Gm-NagR-pNagAa-dCas9-thrLABC-PP_5420 | [**1**](https://sciwheel.com/work/citation?ids=17798601&pre=&suf=&sa=0) |
| pIY1222 | JBx_249329 | pJET-Carb-PP_0168 | [**1**](https://sciwheel.com/work/citation?ids=17798601&pre=&suf=&sa=0) |
| pIY1430 | JBx_249441 | pJET-Carb-PP_0226 | [**1**](https://sciwheel.com/work/citation?ids=17798601&pre=&suf=&sa=0) |
| pIY1025 | JBx_249183 | pJET-Carb-PP_0368 | [**1**](https://sciwheel.com/work/citation?ids=17798601&pre=&suf=&sa=0) |
| pIY1033 | JBx_249199 | pJET-Carb-PP_0437 | [**1**](https://sciwheel.com/work/citation?ids=17798601&pre=&suf=&sa=0) |
| pIY1092 | JBx_249275 | pJET-Carb-PP_0528 | [**1**](https://sciwheel.com/work/citation?ids=17798601&pre=&suf=&sa=0) |
| pIY1059 | JBx_249251 | pJET-Carb-PP_0597 | [**1**](https://sciwheel.com/work/citation?ids=17798601&pre=&suf=&sa=0) |
| pIY1441 | JBx_249463 | pJET-Carb-PP_0654 | [**1**](https://sciwheel.com/work/citation?ids=17798601&pre=&suf=&sa=0) |
| pIY1423 | JBx_249427 | pJET-Carb-PP_0658 | [**1**](https://sciwheel.com/work/citation?ids=17798601&pre=&suf=&sa=0) |
| pIY1442 | JBx_249465 | pJET-Carb-PP_0751 | [**1**](https://sciwheel.com/work/citation?ids=17798601&pre=&suf=&sa=0) |
| pIY1031 | JBx_249195 | pJET-Carb-PP_0774 | [**1**](https://sciwheel.com/work/citation?ids=17798601&pre=&suf=&sa=0) |
| pIY1407 | JBx_249395 | pJET-Carb-PP_0812 | [**1**](https://sciwheel.com/work/citation?ids=17798601&pre=&suf=&sa=0) |
| pIY1408 | JBx_249397 | pJET-Carb-PP_0813 | [**1**](https://sciwheel.com/work/citation?ids=17798601&pre=&suf=&sa=0) |
| pIY1409 | JBx_249399 | pJET-Carb-PP_0814 | [**1**](https://sciwheel.com/work/citation?ids=17798601&pre=&suf=&sa=0) |
| pIY1410 | JBx_249401 | pJET-Carb-PP_0815 | [**1**](https://sciwheel.com/work/citation?ids=17798601&pre=&suf=&sa=0) |
| pIY1438 | JBx_249457 | pJET-Carb-PP_0897 | [**1**](https://sciwheel.com/work/citation?ids=17798601&pre=&suf=&sa=0) |
| pIY1439 | JBx_249459 | pJET-Carb-PP_0944 | [**1**](https://sciwheel.com/work/citation?ids=17798601&pre=&suf=&sa=0) |
| pIY1233 | JBx_249351 | pJET-Carb-PP_0999 | [**1**](https://sciwheel.com/work/citation?ids=17798601&pre=&suf=&sa=0) |
| pIY1252 | JBx_249389 | pJET-Carb-PP_1317 | [**1**](https://sciwheel.com/work/citation?ids=17798601&pre=&suf=&sa=0) |
| pIY1253 | JBx_249391 | pJET-Carb-PP_1318 | [**1**](https://sciwheel.com/work/citation?ids=17798601&pre=&suf=&sa=0) |
| pIY1154 | JBx_249311 | pJET-Carb-PP_1319 | [**1**](https://sciwheel.com/work/citation?ids=17798601&pre=&suf=&sa=0) |
| pIY1406 | JBx_249393 | pJET-Carb-PP_1319 | [**1**](https://sciwheel.com/work/citation?ids=17798601&pre=&suf=&sa=0) |
| pIY1042 | JBx_249217 | pJET-Carb-PP_1444 | [**1**](https://sciwheel.com/work/citation?ids=17798601&pre=&suf=&sa=0) |
| pIY1427 | JBx_249435 | pJET-Carb-PP_1457 | [**1**](https://sciwheel.com/work/citation?ids=17798601&pre=&suf=&sa=0) |
| pIY1424 | JBx_249429 | pJET-Carb-PP_1506 | [**1**](https://sciwheel.com/work/citation?ids=17798601&pre=&suf=&sa=0) |
| pIY1425 | JBx_249431 | pJET-Carb-PP_1620 | [**1**](https://sciwheel.com/work/citation?ids=17798601&pre=&suf=&sa=0) |
| pIY1440 | JBx_249461 | pJET-Carb-PP_1755 | [**1**](https://sciwheel.com/work/citation?ids=17798601&pre=&suf=&sa=0) |
| pIY1416 | JBx_249413 | pJET-Carb-PP_1769 | [**1**](https://sciwheel.com/work/citation?ids=17798601&pre=&suf=&sa=0) |
| pIY1415 | JBx_249411 | pJET-Carb-PP_2095 | [**1**](https://sciwheel.com/work/citation?ids=17798601&pre=&suf=&sa=0) |
| pIY1027 | JBx_249187 | pJET-Carb-PP_2136 | [**1**](https://sciwheel.com/work/citation?ids=17798601&pre=&suf=&sa=0) |
| pIY1084 | JBx_249259 | pJET-Carb-PP_2137 | [**1**](https://sciwheel.com/work/citation?ids=17798601&pre=&suf=&sa=0) |
| pIY1089 | JBx_249269 | pJET-Carb-PP_2213 | [**1**](https://sciwheel.com/work/citation?ids=17798601&pre=&suf=&sa=0) |
| pIY1446 | JBx_249473 | pJET-Carb-PP_2339 | [**1**](https://sciwheel.com/work/citation?ids=17798601&pre=&suf=&sa=0) |
| pIY1086 | JBx_249263 | pJET-Carb-PP_2471 | [**1**](https://sciwheel.com/work/citation?ids=17798601&pre=&suf=&sa=0) |
| pIY1443 | JBx_249467 | pJET-Carb-PP_2925 | [**1**](https://sciwheel.com/work/citation?ids=17798601&pre=&suf=&sa=0) |
| pIY1045 | JBx_249223 | pJET-Carb-PP_3071 | [**1**](https://sciwheel.com/work/citation?ids=17798601&pre=&suf=&sa=0) |
| pIY1083 | JBx_249257 | pJET-Carb-PP_3123 | [**1**](https://sciwheel.com/work/citation?ids=17798601&pre=&suf=&sa=0) |
| pIY1057 | JBx_249247 | pJET-Carb-PP_3578 | [**1**](https://sciwheel.com/work/citation?ids=17798601&pre=&suf=&sa=0) |
| pIY1048 | JBx_249229 | pJET-Carb-PP_3754 | [**1**](https://sciwheel.com/work/citation?ids=17798601&pre=&suf=&sa=0) |
| pIY1050 | JBx_249233 | pJET-Carb-PP_3755 | [**1**](https://sciwheel.com/work/citation?ids=17798601&pre=&suf=&sa=0) |
| pIY1447 | JBx_249475 | pJET-Carb-PP_4011 | [**1**](https://sciwheel.com/work/citation?ids=17798601&pre=&suf=&sa=0) |
| pIY1245 | JBx_249375 | pJET-Carb-PP_4116 | [**1**](https://sciwheel.com/work/citation?ids=17798601&pre=&suf=&sa=0) |
| pIY1225 | JBx_249335 | pJET-Carb-PP_4120 | [**1**](https://sciwheel.com/work/citation?ids=17798601&pre=&suf=&sa=0) |
| pIY1226 | JBx_249337 | pJET-Carb-PP_4121 | [**1**](https://sciwheel.com/work/citation?ids=17798601&pre=&suf=&sa=0) |
| pIY1227 | JBx_249339 | pJET-Carb-PP_4122 | [**1**](https://sciwheel.com/work/citation?ids=17798601&pre=&suf=&sa=0) |
| pIY1228 | JBx_249341 | pJET-Carb-PP_4123 | [**1**](https://sciwheel.com/work/citation?ids=17798601&pre=&suf=&sa=0) |
| pIY1449 | JBx_249479 | pJET-Carb-PP_4185 | [**1**](https://sciwheel.com/work/citation?ids=17798601&pre=&suf=&sa=0) |
| pIY1450 | JBx_249481 | pJET-Carb-PP_4186 | [**1**](https://sciwheel.com/work/citation?ids=17798601&pre=&suf=&sa=0) |
| pIY1241 | JBx_249367 | pJET-Carb-PP_4187 | [**1**](https://sciwheel.com/work/citation?ids=17798601&pre=&suf=&sa=0) |
| pIY1240 | JBx_249365 | [pJET-Carb-PP_4188](https://benchling.com/s/seq-kDxFK9qZvdY38CXivXMj?m=slm-Nd3eGdDQXjrnsTsR1D8W) | [**1**](https://sciwheel.com/work/citation?ids=17798601&pre=&suf=&sa=0) |
| pIY1239 | JBx_249363 | pJET-Carb-PP_4189 | [**1**](https://sciwheel.com/work/citation?ids=17798601&pre=&suf=&sa=0) |
| pIY1436 | JBx_249453 | pJET-Carb-PP_4191 | [**1**](https://sciwheel.com/work/citation?ids=17798601&pre=&suf=&sa=0) |
| pIY1435 | JBx_249451 | pJET-Carb-PP_4192 | [**1**](https://sciwheel.com/work/citation?ids=17798601&pre=&suf=&sa=0) |
| pIY1426 | JBx_249433 | pJET-Carb-PP_4266 | [**1**](https://sciwheel.com/work/citation?ids=17798601&pre=&suf=&sa=0) |
| pIY1090 | JBx_249271 | pJET-Carb-PP_4487 | [**1**](https://sciwheel.com/work/citation?ids=17798601&pre=&suf=&sa=0) |
| pIY1023 | JBx_249179 | pJET-Carb-PP_4549 | [**1**](https://sciwheel.com/work/citation?ids=17798601&pre=&suf=&sa=0) |
| pIY1024 | JBx_249181 | pJET-Carb-PP_4550 | [**1**](https://sciwheel.com/work/citation?ids=17798601&pre=&suf=&sa=0) |
| pIY1094 | JBx_249279 | pJET-Carb-PP_4636 | [**1**](https://sciwheel.com/work/citation?ids=17798601&pre=&suf=&sa=0) |
| pIY1432 | JBx_249445 | pJET-Carb-PP_4651 | [**1**](https://sciwheel.com/work/citation?ids=17798601&pre=&suf=&sa=0) |
| pIY1060 | JBx_249253 | pJET-Carb-PP_4667 | [**1**](https://sciwheel.com/work/citation?ids=17798601&pre=&suf=&sa=0) |
| pIY1055 | JBx_249243 | pJET-Carb-PP_4678 | [**1**](https://sciwheel.com/work/citation?ids=17798601&pre=&suf=&sa=0) |
| pIY1247 | JBx_249379 | pJET-Carb-PP_4862 | [**1**](https://sciwheel.com/work/citation?ids=17798601&pre=&suf=&sa=0) |
| pIY1419 | JBx_249419 | pJET-Carb-PP_5186 | [**1**](https://sciwheel.com/work/citation?ids=17798601&pre=&suf=&sa=0) |
| pIY1428 | JBx_249437 | pJET-Carb-PP_5203 | [**1**](https://sciwheel.com/work/citation?ids=17798601&pre=&suf=&sa=0) |
| pIY1058 | JBx_249249 | pJET-Carb-PP_5288 | [**1**](https://sciwheel.com/work/citation?ids=17798601&pre=&suf=&sa=0) |
| pIY1219 | JBx_249323 | pJET-Carb-PP_5417 | [**1**](https://sciwheel.com/work/citation?ids=17798601&pre=&suf=&sa=0) |
| pTE452 | [JBx_235116](https://registry.jbei.org/folders/entry/235116) | pORTMAGE-Pa1 pmp-Pa.recT,Pa.mutL-E36K BBR1 GmR 3MB inducible promoter. | [3,4](https://sciwheel.com/work/citation?ids=8992976,13679626&pre=&pre=&suf=&suf=&sa=0,0) |
| pTE433β | JBx_236685 | pBBR1-Kan-RBSopt-Fn_Cpf1 sgRNA-PmeI-AgeI | [4](https://sciwheel.com/work/citation?ids=13679626&pre=&suf=&sa=0) |
| PP_0368_KO | JBx_273312 | pBBR1-Kan-RBSopt-Fn_Cpf1 sgRNA-PP_0368 | This study |
| PP_0437_KO | JBx_273313 | pBBR1-Kan-RBSopt-Fn_Cpf1 sgRNA-PP_0437 | This study |
| PP_0528_KO | JBx_273314 | pBBR1-Kan-RBSopt-Fn_Cpf1 sgRNA-PP_0528 | This study |
| PP_0751_KO | JBx_273315 | pBBR1-Kan-RBSopt-Fn_Cpf1 sgRNA-PP_0751 | This study |
| PP_0812_KO | JBx_273316 | pBBR1-Kan-RBSopt-Fn_Cpf1 sgRNA-PP_0812 | This study |
| PP_0813_KO | JBx_273317 | pBBR1-Kan-RBSopt-Fn_Cpf1 sgRNA-PP_0813 | This study |
| PP_0814_KO | JBx_273318 | pBBR1-Kan-RBSopt-Fn_Cpf1 sgRNA-PP_0814 | This study |
| PP_0815_KO | JBx_273319 | pBBR1-Kan-RBSopt-Fn_Cpf1 sgRNA-PP_0815 | This study |
| PP_1317_KO | JBx_273320 | pBBR1-Kan-RBSopt-Fn_Cpf1 sgRNA-PP_1317 | This study |
| PP_1506_KO | JBx_273321 | pBBR1-Kan-RBSopt-Fn_Cpf1 sgRNA-PP_1506 | This study |
| PP_1769_KO | JBx_273322 | pBBR1-Kan-RBSopt-Fn_Cpf1 sgRNA-PP_1769 | This study |
| PP_2136_KO | JBx_273323 | pBBR1-Kan-RBSopt-Fn_Cpf1 sgRNA-PP_2136 | This study |
| PP_4120_KO | JBx_273324 | pBBR1-Kan-RBSopt-Fn_Cpf1 sgRNA-PP_4120 | This study |
| PP_4189_KO | JBx_273325 | pBBR1-Kan-RBSopt-Fn_Cpf1 sgRNA-PP_4189 | This study |
| PP_4191_KO | JBx_273312 | pBBR1-Kan-RBSopt-Fn_Cpf1 sgRNA-PP_4191 | This study |
| PP_4192_KO | JBx_273313 | pBBR1-Kan-RBSopt-Fn_Cpf1 sgRNA-PP_4192 | This study |
| pTE519 | JBx_266188 | pRSF1010-Gm-mCherry | Gift from T. Eng |
| pSTABL1 | JBx_273326 | pRSF1010-Gm-NagR-PP_2791-94 | This study |
| pSTABL2 | JBx_273327 | pRSF1010-Gm-NagR-PP_2208-09 | This study |
| OTS_Screen_01 | JBx_273328 | pRSF1010-Gm-L7-NagR-pNagAa-dCas9-thrLABC-PP_0378 | This study |
| OTS_Screen_02 | JBx_273329 | pRSF1010-Gm-L7-NagR-pNagAa-dCas9-thrLABC-PP_0379 | This study |
| OTS_Screen_03 | JBx_273330 | pRSF1010-Gm-L7-NagR-pNagAa-dCas9-thrLABC-PP_0977 | This study |
| OTS_Screen_04 | JBx_273331 | pRSF1010-Gm-L7-NagR-pNagAa-dCas9-thrLABC-PP_1018 | This study |
| OTS_Screen_05 | JBx_273332 | pRSF1010-Gm-L7-NagR-pNagAa-dCas9-thrLABC-PP_2664 | This study |
| OTS_Screen_06 | JBx_273333 | pRSF1010-Gm-L7-NagR-pNagAa-dCas9-thrLABC-PP_2665 | This study |
| OTS_Screen_07 | JBx_273334 | pRSF1010-Gm-L7-NagR-pNagAa-dCas9-thrLABC-PP_2680 | This study |
| OTS_Screen_08 | JBx_273335 | pRSF1010-Gm-L7-NagR-pNagAa-dCas9-thrLABC-PP_3379 | This study |
| OTS_Screen_09 | JBx_273336 | pRSF1010-Gm-L7-NagR-pNagAa-dCas9-thrLABC-PP_3416 | This study |
| OTS_Screen_10 | JBx_273337 | pRSF1010-Gm-L7-NagR-pNagAa-dCas9-thrLABC-PP_0986 | This study |
| OTS_Screen_11 | JBx_273338 | pRSF1010-Gm-L7-NagR-pNagAa-dCas9-thrLABC-PP_1593 | This study |
| OTS_Screen_12 | JBx_273339 | pRSF1010-Gm-L7-NagR-pNagAa-dCas9-thrLABC-PP_1638 | This study |
| OTS_Screen_13 | JBx_273340 | pRSF1010-Gm-L7-NagR-pNagAa-dCas9-thrLABC-PP_5313 | This study |
| OTS_Screen_14 | JBx_273341 | pRSF1010-Gm-L7-NagR-pNagAa-dCas9-thrLABC-PP_1982 | This study |

#

# **Table S5:** List of sgRNA arrays built during cycles DBTL1-6.

| **Plasmid Name** | **JBEI Accession No.** | **DBTL Cycle** | **Construct** | **# sgRNAs** | **Vector** |
| --- | --- | --- | --- | --- | --- |
| PP_1319_PP_4121_PP_4667 | JBx_267784 | 1 | 01 | 3 | pIY989 |
| PP_2137_PP_4116_PP_4187 | JBx_268145 | 1 | 02 | 3 | pIY989 |
| PP_0226_PP_0897_PP_5288 | JBx_268146 | 1 | 03 | 3 | pIY989 |
| PP_4189_PP_4550_PP_4862 | JBx_268147 | 1 | 04 | 3 | pIY989 |
| PP_1319_PP_1457_PP_4192 | JBx_268148 | 1 | 05 | 3 | pIY989 |
| PP_0813_PP_1769_PP_4191 | JBx_268149 | 1 | 06 | 3 | pIY989 |
| PP_2213_PP_2471_PP_4266 | JBx_268150 | 1 | 07 | 3 | pIY989 |
| PP_0368_PP_4191_PP_4192 | JBx_268151 | 1 | 08 | 3 | pIY989 |
| PP_3123_PP_4862_PP_5186 | JBx_268152 | 1 | 09 | 3 | pIY989 |
| PP_0751_PP_1620_PP_4678 | JBx_268153 | 1 | 10 | 3 | pIY989 |
| PP_0813_PP_4549_PP_5288 | JBx_268154 | 1 | 11 | 3 | pIY989 |
| PP_0658_PP_1506_PP_3071 | JBx_268155 | 1 | 12 | 3 | pIY989 |
| PP_2112_PP_2136_PP_4678 | JBx_268156 | 1 | 13 | 3 | pIY989 |
| PP_2471_PP_3754_PP_4667 | JBx_268157 | 1 | 14 | 3 | pIY989 |
| PP_0368_PP_0812_PP_0944 | JBx_268158 | 1 | 15 | 3 | pIY989 |
| PP_0437_PP_0528_PP_3578 | JBx_268159 | 1 | 16 | 3 | pIY989 |
| PP_0999_PP_3578_PP_5186 | JBx_268160 | 1 | 17 | 3 | pIY989 |
| PP_2112_PP_4189_PP_5186 | JBx_268161 | 1 | 18 | 3 | pIY989 |
| PP_2137_PP_4011_PP_4120 | JBx_268162 | 1 | 19 | 3 | pIY989 |
| PP_0999_PP_4120_PP_4191 | JBx_268163 | 1 | 20 | 3 | pIY989 |
| PP_0226_PP_0597_PP_4678 | JBx_268164 | 1 | 21 | 3 | pIY989 |
| PP_0226_PP_0437_PP_0751 | JBx_268165 | 1 | 22 | 3 | pIY989 |
| PP_0774_PP_1607_PP_3578 | JBx_268166 | 1 | 23 | 3 | pIY989 |
| PP_0597_PP_1769_PP_4862 | JBx_268167 | 1 | 24 | 3 | pIY989 |
| PP_0226_PP_2339_PP_3365 | JBx_268168 | 1 | 25 | 3 | pIY989 |
| PP_2112_PP_4188_PP_4862 | JBx_268169 | 1 | 26 | 3 | pIY989 |
| PP_0658_PP_0815_PP_4187 | JBx_268170 | 1 | 27 | 3 | pIY989 |
| PP_0774_PP_2213_PP_5288 | JBx_268171 | 1 | 28 | 3 | pIY989 |
| PP_1444_PP_4189_PP_4191 | JBx_268172 | 1 | 29 | 3 | pIY989 |
| PP_1506_PP_4651_PP_4862 | JBx_268173 | 1 | 30 | 3 | pIY989 |
| PP_0814_PP_4192 | JBx_268174 | 1 | 31 | 2 | pIY989 |
| PP_0658_PP_2136 | JBx_268175 | 1 | 32 | 2 | pIY989 |
| PP_0437_PP_3365 | JBx_268176 | 1 | 33 | 2 | pIY989 |
| PP_3123_PP_5288 | JBx_268177 | 1 | 34 | 2 | pIY989 |
| PP_0812_PP_4121 | JBx_268178 | 1 | 35 | 2 | pIY989 |
| PP_2339_PP_4186 | JBx_268179 | 1 | 36 | 2 | pIY989 |
| PP_0814_PP_5288 | JBx_268180 | 1 | 37 | 2 | pIY989 |
| PP_4122_PP_4188 | JBx_268181 | 1 | 38 | 2 | pIY989 |
| PP_0774_PP_1769 | JBx_268182 | 1 | 39 | 2 | pIY989 |
| PP_0814_PP_3123 | JBx_268183 | 1 | 40 | 2 | pIY989 |
| PP_1607_PP_4550 | JBx_268184 | 1 | 41 | 2 | pIY989 |
| PP_0813_PP_4120 | JBx_268185 | 1 | 42 | 2 | pIY989 |
| PP_0814_PP_1769 | JBx_268186 | 1 | 43 | 2 | pIY989 |
| PP_1620_PP_4116 | JBx_268187 | 1 | 44 | 2 | pIY989 |
| PP_3755_PP_4122 | JBx_268188 | 1 | 45 | 2 | pIY989 |
| PP_2137_PP_4189 | JBx_268189 | 1 | 46 | 2 | pIY989 |
| PP_0814_PP_4862 | JBx_268190 | 1 | 47 | 2 | pIY989 |
| PP_0368_PP_0597 | JBx_268191 | 1 | 48 | 2 | pIY989 |
| PP_0528_PP_5288 | JBx_268192 | 1 | 49 | 2 | pIY989 |
| PP_0812_PP_2095 | JBx_268193 | 1 | 50 | 2 | pIY989 |
| PP_4122_PP_5417 | JBx_268194 | 1 | 51 | 2 | pIY989 |
| PP_3365_PP_3754 | JBx_268195 | 1 | 52 | 2 | pIY989 |
| PP_0437_PP_4116 | JBx_268196 | 1 | 53 | 2 | pIY989 |
| PP_3123_PP_3755 | JBx_268197 | 1 | 54 | 2 | pIY989 |
| PP_0815_PP_1317 | JBx_268198 | 1 | 55 | 2 | pIY989 |
| PP_1506_PP_5203 | JBx_268199 | 1 | 56 | 2 | pIY989 |
| PP_1319_PP_4678 | JBx_268200 | 1 | 57 | 2 | pIY989 |
| PP_0813_PP_4189 | JBx_268201 | 1 | 58 | 2 | pIY989 |
| PP_3123_PP_4667 | JBx_268202 | 1 | 59 | 2 | pIY989 |
| PP_0999_PP_4679 | JBx_268203 | 1 | 60 | 2 | pIY989 |
| PP_0528_PP_0815_PP_1317_PP_4191 | JBx_268204 | 2 | 01 | 4 | pIY989 |
| PP_0528_PP_0751_PP_0815_PP_1317 | JBx_268205 | 2 | 02 | 4 | pIY989 |
| PP_0528_PP_0813_PP_0815_PP_1317 | JBx_268206 | 2 | 03 | 4 | pIY989 |
| PP_0528_PP_0815_PP_1317_PP_1769 | JBx_268207 | 2 | 04 | 4 | pIY989 |
| PP_0528_PP_0814_PP_0815_PP_1317 | JBx_268208 | 2 | 05 | 4 | pIY989 |
| PP_0528_PP_0815_PP_1317 | JBx_268209 | 2 | 06 | 3 | pIY989 |
| PP_0528_PP_0813_PP_4191 | JBx_268210 | 2 | 07 | 3 | pIY989 |
| PP_0528_PP_0814_PP_4191 | JBx_268211 | 2 | 08 | 3 | pIY989 |
| PP_0528_PP_0751_PP_4191 | JBx_268212 | 2 | 09 | 3 | pIY989 |
| PP_0815_PP_1317_PP_4191 | JBx_268213 | 2 | 10 | 3 | pIY989 |
| PP_0528_PP_0815_PP_4191 | JBx_268214 | 2 | 11 | 3 | pIY989 |
| PP_0528_PP_1769_PP_4191 | JBx_268215 | 2 | 12 | 3 | pIY989 |
| PP_0528_PP_0812_PP_4191 | JBx_268216 | 2 | 13 | 3 | pIY989 |
| PP_0528_PP_4120_PP_4191 | JBx_268217 | 2 | 14 | 3 | pIY989 |
| PP_0368_PP_0528_PP_4191 | JBx_268218 | 2 | 15 | 3 | pIY989 |
| PP_0528_PP_0751_PP_0813 | JBx_268219 | 2 | 16 | 3 | pIY989 |
| PP_0751_PP_0815_PP_1317 | JBx_268220 | 2 | 17 | 3 | pIY989 |
| PP_0751_PP_0814_PP_4191 | JBx_268221 | 2 | 18 | 3 | pIY989 |
| PP_0814_PP_0815_PP_1317 | JBx_268222 | 2 | 19 | 3 | pIY989 |
| PP_0815_PP_1317_PP_1769 | JBx_268223 | 2 | 20 | 3 | pIY989 |
| PP_0813_PP_0815_PP_1317 | JBx_268224 | 2 | 21 | 3 | pIY989 |
| PP_0815_PP_1317_PP_4189 | JBx_268225 | 2 | 22 | 3 | pIY989 |
| PP_0813_PP_4189_PP_4191 | JBx_268226 | 2 | 23 | 3 | pIY989 |
| PP_0813_PP_0814_PP_4191 | JBx_268227 | 2 | 24 | 3 | pIY989 |
| PP_0437_PP_0751_PP_4191 | JBx_268228 | 2 | 25 | 3 | pIY989 |
| PP_0751_PP_0813_PP_4191 | JBx_268229 | 2 | 26 | 3 | pIY989 |
| PP_0812_PP_0815_PP_1317 | JBx_268230 | 2 | 27 | 3 | pIY989 |
| PP_0815_PP_1317_PP_2136 | JBx_268231 | 2 | 28 | 3 | pIY989 |
| PP_0437_PP_0751_PP_0814 | JBx_268232 | 2 | 29 | 3 | pIY989 |
| PP_0751_PP_0813_PP_4189 | JBx_268233 | 2 | 30 | 3 | pIY989 |
| PP_0751_PP_0814_PP_1769 | JBx_268234 | 2 | 31 | 3 | pIY989 |
| PP_0751_PP_0813_PP_0814 | JBx_268235 | 2 | 32 | 3 | pIY989 |
| PP_0813_PP_1769_PP_4189 | JBx_268236 | 2 | 33 | 3 | pIY989 |
| PP_0751_PP_1769_PP_4189 | JBx_268237 | 2 | 34 | 3 | pIY989 |
| PP_0813_PP_0814_PP_1769 | JBx_268238 | 2 | 35 | 3 | pIY989 |
| PP_0751_PP_0814 | JBx_268239 | 2 | 36 | 2 | pIY989 |
| PP_0813_PP_0814 | JBx_268240 | 2 | 37 | 2 | pIY989 |
| PP_0751_PP_4189 | JBx_268241 | 2 | 38 | 2 | pIY989 |
| PP_0751_PP_0813 | JBx_268242 | 2 | 39 | 2 | pIY989 |
| PP_1769_PP_4189 | JBx_268243 | 2 | 40 | 2 | pIY989 |
| PP_0437_PP_0814 | JBx_268244 | 2 | 41 | 2 | pIY989 |
| PP_0814_PP_4189 | JBx_268245 | 2 | 42 | 2 | pIY989 |
| PP_0812_PP_0814 | JBx_268246 | 2 | 43 | 2 | pIY989 |
| PP_0814_PP_2136 | JBx_268247 | 2 | 44 | 2 | pIY989 |
| PP_0813_PP_1769 | JBx_268248 | 2 | 45 | 2 | pIY989 |
| PP_0812_PP_4189 | JBx_268249 | 2 | 46 | 2 | pIY989 |
| PP_2136_PP_4189 | JBx_268250 | 2 | 47 | 2 | pIY989 |
| PP_0437_PP_4189 | JBx_268251 | 2 | 48 | 2 | pIY989 |
| PP_0368_PP_0813 | JBx_268252 | 2 | 49 | 2 | pIY989 |
| PP_0368_PP_4189 | JBx_268253 | 2 | 50 | 2 | pIY989 |
| PP_4189_PP_4192 | JBx_268254 | 2 | 51 | 2 | pIY989 |
| PP_1506_PP_4189 | JBx_268255 | 2 | 52 | 2 | pIY989 |
| PP_4120_PP_4189 | JBx_268256 | 2 | 53 | 2 | pIY989 |
| PP_0812_PP_1769 | JBx_268257 | 2 | 54 | 2 | pIY989 |
| PP_0368_PP_1769 | JBx_268258 | 2 | 55 | 2 | pIY989 |
| PP_1769_PP_2136 | JBx_268259 | 2 | 56 | 2 | pIY989 |
| PP_1506_PP_1769 | JBx_268260 | 2 | 57 | 2 | pIY989 |
| PP_0437_PP_1769 | JBx_268261 | 2 | 58 | 2 | pIY989 |
| PP_1769_PP_4192 | JBx_268262 | 2 | 59 | 2 | pIY989 |
| PP_0368_PP_0812 | JBx_268263 | 2 | 60 | 2 | pIY989 |
| PP_0528_PP_0815_PP_1317_PP_4191 | JBx_268264 | 3 | 01 | 4 | DBTL3-6_Vector |
| PP_0528_PP_0751_PP_0815_PP_1317 | JBx_268265 | 3 | 02 | 4 | DBTL3-6_Vector |
| PP_0528_PP_0813_PP_0815_PP_1317 | JBx_268266 | 3 | 03 | 4 | DBTL3-6_Vector |
| PP_0528_PP_0815_PP_1317_PP_1769 | JBx_268267 | 3 | 04 | 4 | DBTL3-6_Vector |
| PP_0528_PP_0814_PP_0815_PP_1317 | JBx_268268 | 3 | 05 | 4 | DBTL3-6_Vector |
| PP_0528_PP_0815_PP_1317 | JBx_268269 | 3 | 06 | 3 | DBTL3-6_Vector |
| PP_0528_PP_0813_PP_4191 | JBx_268270 | 3 | 07 | 3 | DBTL3-6_Vector |
| PP_0528_PP_0814_PP_4191 | JBx_268271 | 3 | 08 | 3 | DBTL3-6_Vector |
| PP_0528_PP_0751_PP_4191 | JBx_268272 | 3 | 09 | 3 | DBTL3-6_Vector |
| PP_0815_PP_1317_PP_4191 | JBx_268273 | 3 | 10 | 3 | DBTL3-6_Vector |
| PP_0528_PP_0815_PP_4191 | JBx_268274 | 3 | 11 | 3 | DBTL3-6_Vector |
| PP_0528_PP_1769_PP_4191 | JBx_268275 | 3 | 12 | 3 | DBTL3-6_Vector |
| PP_0528_PP_0812_PP_4191 | JBx_268276 | 3 | 13 | 3 | DBTL3-6_Vector |
| PP_0528_PP_4120_PP_4191 | JBx_268277 | 3 | 14 | 3 | DBTL3-6_Vector |
| PP_0368_PP_0528_PP_4191 | JBx_268278 | 3 | 15 | 3 | DBTL3-6_Vector |
| PP_0528_PP_0751_PP_0813 | JBx_268279 | 3 | 16 | 3 | DBTL3-6_Vector |
| PP_0751_PP_0815_PP_1317 | JBx_268280 | 3 | 17 | 3 | DBTL3-6_Vector |
| PP_0751_PP_0814_PP_4191 | JBx_268281 | 3 | 18 | 3 | DBTL3-6_Vector |
| PP_0814_PP_0815_PP_1317 | JBx_268282 | 3 | 19 | 3 | DBTL3-6_Vector |
| PP_0815_PP_1317_PP_1769 | JBx_268283 | 3 | 20 | 3 | DBTL3-6_Vector |
| PP_0813_PP_0815_PP_1317 | JBx_268284 | 3 | 21 | 3 | DBTL3-6_Vector |
| PP_0815_PP_1317_PP_4189 | JBx_268285 | 3 | 22 | 3 | DBTL3-6_Vector |
| PP_0813_PP_4189_PP_4191 | JBx_268286 | 3 | 23 | 3 | DBTL3-6_Vector |
| PP_0813_PP_0814_PP_4191 | JBx_268287 | 3 | 24 | 3 | DBTL3-6_Vector |
| PP_0437_PP_0751_PP_4191 | JBx_268288 | 3 | 25 | 3 | DBTL3-6_Vector |
| PP_0751_PP_0813_PP_4191 | JBx_268289 | 3 | 26 | 3 | DBTL3-6_Vector |
| PP_0812_PP_0815_PP_1317 | JBx_268290 | 3 | 27 | 3 | DBTL3-6_Vector |
| PP_0815_PP_1317_PP_2136 | JBx_268291 | 3 | 28 | 3 | DBTL3-6_Vector |
| PP_0437_PP_0751_PP_0814 | JBx_268292 | 3 | 29 | 3 | DBTL3-6_Vector |
| PP_0751_PP_0813_PP_4189 | JBx_268293 | 3 | 30 | 3 | DBTL3-6_Vector |
| PP_0751_PP_0814_PP_1769 | JBx_268294 | 3 | 31 | 3 | DBTL3-6_Vector |
| PP_0751_PP_0813_PP_0814 | JBx_268295 | 3 | 32 | 3 | DBTL3-6_Vector |
| PP_0813_PP_1769_PP_4189 | JBx_268296 | 3 | 33 | 3 | DBTL3-6_Vector |
| PP_0751_PP_1769_PP_4189 | JBx_268297 | 3 | 34 | 3 | DBTL3-6_Vector |
| PP_0813_PP_0814_PP_1769 | JBx_268298 | 3 | 35 | 3 | DBTL3-6_Vector |
| PP_0751_PP_0814 | JBx_268299 | 3 | 36 | 2 | DBTL3-6_Vector |
| PP_0813_PP_0814 | JBx_268300 | 3 | 37 | 2 | DBTL3-6_Vector |
| PP_0751_PP_4189 | JBx_268301 | 3 | 38 | 2 | DBTL3-6_Vector |
| PP_0751_PP_0813 | JBx_268302 | 3 | 39 | 2 | DBTL3-6_Vector |
| PP_1769_PP_4189 | JBx_268303 | 3 | 40 | 2 | DBTL3-6_Vector |
| PP_0437_PP_0814 | JBx_268304 | 3 | 41 | 2 | DBTL3-6_Vector |
| PP_0814_PP_4189 | JBx_268305 | 3 | 42 | 2 | DBTL3-6_Vector |
| PP_0812_PP_0814 | JBx_268306 | 3 | 43 | 2 | DBTL3-6_Vector |
| PP_0814_PP_2136 | JBx_268307 | 3 | 44 | 2 | DBTL3-6_Vector |
| PP_0813_PP_1769 | JBx_268308 | 3 | 45 | 2 | DBTL3-6_Vector |
| PP_0812_PP_4189 | JBx_268309 | 3 | 46 | 2 | DBTL3-6_Vector |
| PP_2136_PP_4189 | JBx_268310 | 3 | 47 | 2 | DBTL3-6_Vector |
| PP_0437_PP_4189 | JBx_268311 | 3 | 48 | 2 | DBTL3-6_Vector |
| PP_0368_PP_0813 | JBx_268312 | 3 | 49 | 2 | DBTL3-6_Vector |
| PP_0368_PP_4189 | JBx_268313 | 3 | 50 | 2 | DBTL3-6_Vector |
| PP_4189_PP_4192 | JBx_268314 | 3 | 51 | 2 | DBTL3-6_Vector |
| PP_1506_PP_4189 | JBx_268315 | 3 | 52 | 2 | DBTL3-6_Vector |
| PP_4120_PP_4189 | JBx_268316 | 3 | 53 | 2 | DBTL3-6_Vector |
| PP_0812_PP_1769 | JBx_268317 | 3 | 54 | 2 | DBTL3-6_Vector |
| PP_0368_PP_1769 | JBx_268318 | 3 | 55 | 2 | DBTL3-6_Vector |
| PP_1769_PP_2136 | JBx_268319 | 3 | 56 | 2 | DBTL3-6_Vector |
| PP_1506_PP_1769 | JBx_268320 | 3 | 57 | 2 | DBTL3-6_Vector |
| PP_0437_PP_1769 | JBx_268321 | 3 | 58 | 2 | DBTL3-6_Vector |
| PP_1769_PP_4192 | JBx_268322 | 3 | 59 | 2 | DBTL3-6_Vector |
| PP_0368_PP_0812 | JBx_268323 | 3 | 60 | 2 | DBTL3-6_Vector |
| PP_0751_PP_0814_PP_1506_PP_1769 | JBx_268324 | 4 | 01 | 4 | DBTL3-6_Vector |
| PP_0751_PP_0814_PP_1506_PP_4120 | JBx_268325 | 4 | 02 | 4 | DBTL3-6_Vector |
| PP_0751_PP_0814_PP_1769_PP_4120 | JBx_268326 | 4 | 03 | 4 | DBTL3-6_Vector |
| PP_0751_PP_0814_PP_1769_PP_4192 | JBx_268327 | 4 | 04 | 4 | DBTL3-6_Vector |
| PP_0751_PP_0814_PP_4120_PP_4192 | JBx_268328 | 4 | 05 | 4 | DBTL3-6_Vector |
| PP_0368_PP_0437_PP_0812 | JBx_268329 | 4 | 06 | 3 | DBTL3-6_Vector |
| PP_0368_PP_0751_PP_0814 | JBx_268330 | 4 | 07 | 3 | DBTL3-6_Vector |
| PP_0368_PP_0812_PP_0813 | JBx_268331 | 4 | 08 | 3 | DBTL3-6_Vector |
| PP_0368_PP_0812_PP_0815 | JBx_268332 | 4 | 09 | 3 | DBTL3-6_Vector |
| PP_0368_PP_0812_PP_1506 | JBx_268333 | 4 | 10 | 3 | DBTL3-6_Vector |
| PP_0368_PP_0812_PP_1769 | JBx_268334 | 4 | 11 | 3 | DBTL3-6_Vector |
| PP_0368_PP_0812_PP_4120 | JBx_268335 | 4 | 12 | 3 | DBTL3-6_Vector |
| PP_0368_PP_0812_PP_4192 | JBx_268336 | 4 | 13 | 3 | DBTL3-6_Vector |
| PP_0368_PP_0815_PP_1317 | JBx_268337 | 4 | 14 | 3 | DBTL3-6_Vector |
| PP_0368_PP_4189_PP_4192 | JBx_268338 | 4 | 15 | 3 | DBTL3-6_Vector |
| PP_0437_PP_0815_PP_1317 | JBx_268339 | 4 | 16 | 3 | DBTL3-6_Vector |
| PP_0528_PP_0751_PP_0814 | JBx_268340 | 4 | 17 | 3 | DBTL3-6_Vector |
| PP_0528_PP_0812_PP_0815 | JBx_268341 | 4 | 18 | 3 | DBTL3-6_Vector |
| PP_0751_PP_0812_PP_0814 | JBx_268342 | 4 | 19 | 3 | DBTL3-6_Vector |
| PP_0751_PP_0813_PP_0814 | JBx_268343 | 4 | 20 | 3 | DBTL3-6_Vector |
| PP_0751_PP_0814_PP_1506 | JBx_268344 | 4 | 21 | 3 | DBTL3-6_Vector |
| PP_0751_PP_0814_PP_2136 | JBx_268345 | 4 | 22 | 3 | DBTL3-6_Vector |
| PP_0751_PP_0814_PP_4120 | JBx_268346 | 4 | 23 | 3 | DBTL3-6_Vector |
| PP_0751_PP_0814_PP_4189 | JBx_268347 | 4 | 24 | 3 | DBTL3-6_Vector |
| PP_0751_PP_0814_PP_4191 | JBx_268348 | 4 | 25 | 3 | DBTL3-6_Vector |
| PP_0751_PP_0814_PP_4192 | JBx_268349 | 4 | 26 | 3 | DBTL3-6_Vector |
| PP_0812_PP_0813_PP_0815 | JBx_268350 | 4 | 27 | 3 | DBTL3-6_Vector |
| PP_0813_PP_4189_PP_4192 | JBx_268351 | 4 | 28 | 3 | DBTL3-6_Vector |
| PP_0815_PP_1317_PP_1506 | JBx_268352 | 4 | 29 | 3 | DBTL3-6_Vector |
| PP_0815_PP_1317_PP_1769 | JBx_268353 | 4 | 30 | 3 | DBTL3-6_Vector |
| PP_0815_PP_1317_PP_2136 | JBx_268354 | 4 | 31 | 3 | DBTL3-6_Vector |
| PP_0815_PP_1317_PP_4120 | JBx_268355 | 4 | 32 | 3 | DBTL3-6_Vector |
| PP_0815_PP_1317_PP_4192 | JBx_268356 | 4 | 33 | 3 | DBTL3-6_Vector |
| PP_1506_PP_4189_PP_4192 | JBx_268357 | 4 | 34 | 3 | DBTL3-6_Vector |
| PP_4120_PP_4189_PP_4192 | JBx_268358 | 4 | 35 | 3 | DBTL3-6_Vector |
| PP_0368_PP_0528 | JBx_268359 | 4 | 36 | 2 | DBTL3-6_Vector |
| PP_0368_PP_0751 | JBx_268360 | 4 | 37 | 2 | DBTL3-6_Vector |
| PP_0368_PP_0814 | JBx_268361 | 4 | 38 | 2 | DBTL3-6_Vector |
| PP_0368_PP_0815 | JBx_268362 | 4 | 39 | 2 | DBTL3-6_Vector |
| PP_0368_PP_4191 | JBx_268363 | 4 | 40 | 2 | DBTL3-6_Vector |
| PP_0528_PP_0814 | JBx_268364 | 4 | 41 | 2 | DBTL3-6_Vector |
| PP_0528_PP_0815 | JBx_268365 | 4 | 42 | 2 | DBTL3-6_Vector |
| PP_0528_PP_4189 | JBx_268366 | 4 | 43 | 2 | DBTL3-6_Vector |
| PP_0751_PP_0815 | JBx_268367 | 4 | 44 | 2 | DBTL3-6_Vector |
| PP_0813_PP_0815 | JBx_268368 | 4 | 45 | 2 | DBTL3-6_Vector |
| PP_0813_PP_4189 | JBx_268369 | 4 | 46 | 2 | DBTL3-6_Vector |
| PP_0814_PP_0815 | JBx_268370 | 4 | 47 | 2 | DBTL3-6_Vector |
| PP_0814_PP_1317 | JBx_268371 | 4 | 48 | 2 | DBTL3-6_Vector |
| PP_0814_PP_1506 | JBx_268372 | 4 | 49 | 2 | DBTL3-6_Vector |
| PP_0814_PP_1769 | JBx_268373 | 4 | 50 | 2 | DBTL3-6_Vector |
| PP_0814_PP_4120 | JBx_268374 | 4 | 51 | 2 | DBTL3-6_Vector |
| PP_0814_PP_4189 | JBx_268375 | 4 | 52 | 2 | DBTL3-6_Vector |
| PP_0814_PP_4191 | JBx_268376 | 4 | 53 | 2 | DBTL3-6_Vector |
| PP_0814_PP_4192 | JBx_268377 | 4 | 54 | 2 | DBTL3-6_Vector |
| PP_0815_PP_4120 | JBx_268378 | 4 | 55 | 2 | DBTL3-6_Vector |
| PP_0815_PP_4189 | JBx_268379 | 4 | 56 | 2 | DBTL3-6_Vector |
| PP_1317_PP_4189 | JBx_268380 | 4 | 57 | 2 | DBTL3-6_Vector |
| PP_1506_PP_4189 | JBx_268381 | 4 | 58 | 2 | DBTL3-6_Vector |
| PP_4120_PP_4189 | JBx_268382 | 4 | 59 | 2 | DBTL3-6_Vector |
| PP_4189_PP_4191 | JBx_268383 | 4 | 60 | 2 | DBTL3-6_Vector |
| PP_0368_PP_0751_PP_0812_PP_0815 | JBx_268384 | 5 | 01 | 4 | DBTL3-6_Vector |
| PP_0368_PP_0812_PP_0813_PP_0815 | JBx_268385 | 5 | 02 | 4 | DBTL3-6_Vector |
| PP_0368_PP_0812_PP_0815_PP_1769 | JBx_268386 | 5 | 03 | 4 | DBTL3-6_Vector |
| PP_0368_PP_0812_PP_0815_PP_2136 | JBx_268387 | 5 | 04 | 4 | DBTL3-6_Vector |
| PP_0751_PP_0812_PP_0813_PP_0815 | JBx_268388 | 5 | 05 | 4 | DBTL3-6_Vector |
| PP_0368_PP_0528_PP_0812 | JBx_268389 | 5 | 06 | 3 | DBTL3-6_Vector |
| PP_0368_PP_0751_PP_0812 | JBx_268390 | 5 | 07 | 3 | DBTL3-6_Vector |
| PP_0368_PP_0751_PP_0813 | JBx_268391 | 5 | 08 | 3 | DBTL3-6_Vector |
| PP_0368_PP_0751_PP_0815 | JBx_268392 | 5 | 09 | 3 | DBTL3-6_Vector |
| PP_0368_PP_0751_PP_4189 | JBx_268393 | 5 | 10 | 3 | DBTL3-6_Vector |
| PP_0368_PP_0812_PP_0814 | JBx_268394 | 5 | 11 | 3 | DBTL3-6_Vector |
| PP_0368_PP_0812_PP_1317 | JBx_268395 | 5 | 12 | 3 | DBTL3-6_Vector |
| PP_0368_PP_0812_PP_2136 | JBx_268396 | 5 | 13 | 3 | DBTL3-6_Vector |
| PP_0368_PP_0812_PP_4189 | JBx_268397 | 5 | 14 | 3 | DBTL3-6_Vector |
| PP_0368_PP_0813_PP_0815 | JBx_268398 | 5 | 15 | 3 | DBTL3-6_Vector |
| PP_0368_PP_0813_PP_4189 | JBx_268399 | 5 | 16 | 3 | DBTL3-6_Vector |
| PP_0368_PP_0814_PP_0815 | JBx_268400 | 5 | 17 | 3 | DBTL3-6_Vector |
| PP_0368_PP_0815_PP_4189 | JBx_268401 | 5 | 18 | 3 | DBTL3-6_Vector |
| PP_0751_PP_0812_PP_0813 | JBx_268402 | 5 | 19 | 3 | DBTL3-6_Vector |
| PP_0751_PP_0812_PP_0815 | JBx_268403 | 5 | 20 | 3 | DBTL3-6_Vector |
| PP_0751_PP_0812_PP_4189 | JBx_268404 | 5 | 21 | 3 | DBTL3-6_Vector |
| PP_0751_PP_0813_PP_0815 | JBx_268405 | 5 | 22 | 3 | DBTL3-6_Vector |
| PP_0751_PP_0814_PP_0815 | JBx_268406 | 5 | 23 | 3 | DBTL3-6_Vector |
| PP_0751_PP_0814_PP_4189 | JBx_268407 | 5 | 24 | 3 | DBTL3-6_Vector |
| PP_0751_PP_0815_PP_4189 | JBx_268408 | 5 | 25 | 3 | DBTL3-6_Vector |
| PP_0812_PP_0813_PP_0814 | JBx_268409 | 5 | 26 | 3 | DBTL3-6_Vector |
| PP_0812_PP_0813_PP_1317 | JBx_268410 | 5 | 27 | 3 | DBTL3-6_Vector |
| PP_0812_PP_0813_PP_4189 | JBx_268411 | 5 | 28 | 3 | DBTL3-6_Vector |
| PP_0812_PP_0814_PP_0815 | JBx_268412 | 5 | 29 | 3 | DBTL3-6_Vector |
| PP_0812_PP_0815_PP_2136 | JBx_268413 | 5 | 30 | 3 | DBTL3-6_Vector |
| PP_0812_PP_0815_PP_4189 | JBx_268414 | 5 | 31 | 3 | DBTL3-6_Vector |
| PP_0813_PP_0814_PP_0815 | JBx_268415 | 5 | 32 | 3 | DBTL3-6_Vector |
| PP_0814_PP_0815_PP_1506 | JBx_268416 | 5 | 33 | 3 | DBTL3-6_Vector |
| PP_0814_PP_0815_PP_1769 | JBx_268417 | 5 | 34 | 3 | DBTL3-6_Vector |
| PP_0814_PP_0815_PP_2136 | JBx_268418 | 5 | 35 | 3 | DBTL3-6_Vector |
| PP_0368_PP_0437 | JBx_268419 | 5 | 36 | 2 | DBTL3-6_Vector |
| PP_0437_PP_0751 | JBx_268420 | 5 | 37 | 2 | DBTL3-6_Vector |
| PP_0437_PP_0812 | JBx_268421 | 5 | 38 | 2 | DBTL3-6_Vector |
| PP_0437_PP_0813 | JBx_268422 | 5 | 39 | 2 | DBTL3-6_Vector |
| PP_0437_PP_0815 | JBx_268423 | 5 | 40 | 2 | DBTL3-6_Vector |
| PP_0528_PP_0751 | JBx_268424 | 5 | 41 | 2 | DBTL3-6_Vector |
| PP_0528_PP_0812 | JBx_268425 | 5 | 42 | 2 | DBTL3-6_Vector |
| PP_0528_PP_0813 | JBx_268426 | 5 | 43 | 2 | DBTL3-6_Vector |
| PP_0528_PP_1317 | JBx_268427 | 5 | 44 | 2 | DBTL3-6_Vector |
| PP_0751_PP_0812 | JBx_268428 | 5 | 45 | 2 | DBTL3-6_Vector |
| PP_0751_PP_1317 | JBx_268429 | 5 | 46 | 2 | DBTL3-6_Vector |
| PP_0751_PP_1506 | JBx_268430 | 5 | 47 | 2 | DBTL3-6_Vector |
| PP_0751_PP_1769 | JBx_268431 | 5 | 48 | 2 | DBTL3-6_Vector |
| PP_0751_PP_2136 | JBx_268432 | 5 | 49 | 2 | DBTL3-6_Vector |
| PP_0751_PP_4120 | JBx_268433 | 5 | 50 | 2 | DBTL3-6_Vector |
| PP_0751_PP_4191 | JBx_268434 | 5 | 51 | 2 | DBTL3-6_Vector |
| PP_0751_PP_4192 | JBx_268435 | 5 | 52 | 2 | DBTL3-6_Vector |
| PP_0812_PP_0813 | JBx_268436 | 5 | 53 | 2 | DBTL3-6_Vector |
| PP_0812_PP_2136 | JBx_268437 | 5 | 54 | 2 | DBTL3-6_Vector |
| PP_0812_PP_4191 | JBx_268438 | 5 | 55 | 2 | DBTL3-6_Vector |
| PP_0813_PP_1317 | JBx_268439 | 5 | 56 | 2 | DBTL3-6_Vector |
| PP_0813_PP_2136 | JBx_268440 | 5 | 57 | 2 | DBTL3-6_Vector |
| PP_0815_PP_2136 | JBx_268441 | 5 | 58 | 2 | DBTL3-6_Vector |
| PP_0815_PP_4191 | JBx_268442 | 5 | 59 | 2 | DBTL3-6_Vector |
| PP_1317_PP_4191 | JBx_268443 | 5 | 60 | 2 | DBTL3-6_Vector |
| PP_0368_PP_0528_PP_0751_PP_0815 | JBx_268444 | 6 | 01 | 4 | DBTL3-6_Vector |
| PP_0368_PP_0814_PP_0815_PP_1769 | JBx_268445 | 6 | 02 | 4 | DBTL3-6_Vector |
| PP_0812_PP_0813_PP_0815_PP_1506 | JBx_268446 | 6 | 03 | 4 | DBTL3-6_Vector |
| PP_0751_PP_0814_PP_0815_PP_1769 | JBx_268447 | 6 | 04 | 4 | DBTL3-6_Vector |
| PP_0751_PP_0814_PP_0815_PP_1506 | JBx_268448 | 6 | 05 | 4 | DBTL3-6_Vector |
| PP_0751_PP_0813_PP_0815_PP_1769 | JBx_268449 | 6 | 06 | 4 | DBTL3-6_Vector |
| PP_0751_PP_0812_PP_0815_PP_1769 | JBx_268450 | 6 | 07 | 4 | DBTL3-6_Vector |
| PP_0751_PP_0812_PP_0815_PP_1506 | JBx_268451 | 6 | 08 | 4 | DBTL3-6_Vector |
| PP_0528_PP_0751_PP_0815_PP_1769 | JBx_268452 | 6 | 09 | 4 | DBTL3-6_Vector |
| PP_0528_PP_0751_PP_0812_PP_0815 | JBx_268453 | 6 | 10 | 4 | DBTL3-6_Vector |
| PP_0528_PP_0751_PP_0813_PP_0815 | JBx_268454 | 6 | 11 | 4 | DBTL3-6_Vector |
| PP_0368_PP_0814_PP_0815_PP_1506 | JBx_268455 | 6 | 12 | 4 | DBTL3-6_Vector |
| PP_0368_PP_0751_PP_0813_PP_0815 | JBx_268456 | 6 | 13 | 4 | DBTL3-6_Vector |
| PP_0368_PP_0751_PP_0814_PP_0815 | JBx_268457 | 6 | 14 | 4 | DBTL3-6_Vector |
| PP_0368_PP_0751_PP_0815_PP_1506 | JBx_268458 | 6 | 15 | 4 | DBTL3-6_Vector |
| PP_0368_PP_0751_PP_0815_PP_1769 | JBx_268459 | 6 | 16 | 4 | DBTL3-6_Vector |
| PP_0368_PP_0813_PP_0815_PP_1506 | JBx_268460 | 6 | 17 | 4 | DBTL3-6_Vector |
| PP_0368_PP_0751_PP_0815_PP_4120 | JBx_268461 | 6 | 18 | 4 | DBTL3-6_Vector |
| PP_0368_PP_0813_PP_0814_PP_0815 | JBx_268462 | 6 | 19 | 4 | DBTL3-6_Vector |
| PP_0368_PP_0812_PP_0815_PP_1506 | JBx_268463 | 6 | 20 | 4 | DBTL3-6_Vector |
| PP_0813_PP_0815_PP_1769 | JBx_268464 | 6 | 21 | 3 | DBTL3-6_Vector |
| PP_0812_PP_0815_PP_1506 | JBx_268465 | 6 | 22 | 3 | DBTL3-6_Vector |
| PP_0812_PP_0815_PP_1769 | JBx_268466 | 6 | 23 | 3 | DBTL3-6_Vector |
| PP_0813_PP_0815_PP_1506 | JBx_268467 | 6 | 24 | 3 | DBTL3-6_Vector |
| PP_0814_PP_0815_PP_4120 | JBx_268468 | 6 | 25 | 3 | DBTL3-6_Vector |
| PP_0813_PP_0815_PP_2136 | JBx_268469 | 6 | 26 | 3 | DBTL3-6_Vector |
| PP_0815_PP_1769_PP_4189 | JBx_268470 | 6 | 27 | 3 | DBTL3-6_Vector |
| PP_0814_PP_0815_PP_4189 | JBx_268471 | 6 | 28 | 3 | DBTL3-6_Vector |
| PP_0815_PP_1506_PP_1769 | JBx_268472 | 6 | 29 | 3 | DBTL3-6_Vector |
| PP_0815_PP_1506_PP_2136 | JBx_268473 | 6 | 30 | 3 | DBTL3-6_Vector |
| PP_0751_PP_0815_PP_4120 | JBx_268474 | 6 | 31 | 3 | DBTL3-6_Vector |
| PP_0815_PP_1506_PP_4120 | JBx_268475 | 6 | 32 | 3 | DBTL3-6_Vector |
| PP_0815_PP_1506_PP_4189 | JBx_268476 | 6 | 33 | 3 | DBTL3-6_Vector |
| PP_0815_PP_1506_PP_4192 | JBx_268477 | 6 | 34 | 3 | DBTL3-6_Vector |
| PP_0815_PP_1769_PP_2136 | JBx_268478 | 6 | 35 | 3 | DBTL3-6_Vector |
| PP_0751_PP_0815_PP_4192 | JBx_268479 | 6 | 36 | 3 | DBTL3-6_Vector |
| PP_0751_PP_0813_PP_0815 | JBx_268480 | 6 | 37 | 3 | DBTL3-6_Vector |
| PP_0751_PP_0815_PP_2136 | JBx_268481 | 6 | 38 | 3 | DBTL3-6_Vector |
| PP_0528_PP_0815_PP_2136 | JBx_268482 | 6 | 39 | 3 | DBTL3-6_Vector |
| PP_0368_PP_0815_PP_1506 | JBx_268483 | 6 | 40 | 3 | DBTL3-6_Vector |
| PP_0368_PP_0815_PP_1769 | JBx_268484 | 6 | 41 | 3 | DBTL3-6_Vector |
| PP_0368_PP_0815_PP_2136 | JBx_268485 | 6 | 42 | 3 | DBTL3-6_Vector |
| PP_0368_PP_0815_PP_4120 | JBx_268486 | 6 | 43 | 3 | DBTL3-6_Vector |
| PP_0528_PP_0751_PP_0815 | JBx_268487 | 6 | 44 | 3 | DBTL3-6_Vector |
| PP_0528_PP_0813_PP_0815 | JBx_268488 | 6 | 45 | 3 | DBTL3-6_Vector |
| PP_0751_PP_0815_PP_1769 | JBx_268489 | 6 | 46 | 3 | DBTL3-6_Vector |
| PP_0528_PP_0815_PP_1769 | JBx_268490 | 6 | 47 | 3 | DBTL3-6_Vector |
| PP_0751_PP_0812_PP_0815 | JBx_268491 | 6 | 48 | 3 | DBTL3-6_Vector |
| PP_0368_PP_0528_PP_0815 | JBx_268492 | 6 | 49 | 3 | DBTL3-6_Vector |
| PP_0751_PP_0815_PP_1506 | JBx_268493 | 6 | 50 | 3 | DBTL3-6_Vector |
| PP_0813_PP_1506 | JBx_268494 | 6 | 51 | 2 | DBTL3-6_Vector |
| PP_0528_PP_1769 | JBx_268495 | 6 | 52 | 2 | DBTL3-6_Vector |
| PP_0815_PP_1506 | JBx_268496 | 6 | 53 | 2 | DBTL3-6_Vector |
| PP_0528_PP_2136 | JBx_268497 | 6 | 54 | 2 | DBTL3-6_Vector |
| PP_0528_PP_4191 | JBx_268498 | 6 | 55 | 2 | DBTL3-6_Vector |
| PP_0368_PP_1506 | JBx_268499 | 6 | 56 | 2 | DBTL3-6_Vector |
| PP_0812_PP_1506 | JBx_268500 | 6 | 57 | 2 | DBTL3-6_Vector |
| PP_0815_PP_1769 | JBx_268501 | 6 | 58 | 2 | DBTL3-6_Vector |
| PP_0815_PP_4192 | JBx_268502 | 6 | 59 | 2 | DBTL3-6_Vector |
| PP_1506_PP_4120 | JBx_268503 | 6 | 60 | 2 | DBTL3-6_Vector |

| **Strain** | **JBEI Registry Part ID** | **Genotype** | **Ref** |
| --- | --- | --- | --- |
| IY1449b | JBx_273364 | KT2440 ΔphaABC, ΔmvaB, ΔhbdH, 4,538,575 Δ86,812 | This work |
| IY1449b ΔPP_0368 | JBx_273365 | IY1449b ΔPP_0368 | This work |
| IY1449b ΔPP_0751 | JBx_273366 | IY1449b ΔPP_0751 | This work |
| IY1449b ΔPP_0812 | JBx_273367 | IY1449b ΔPP_0812 | This work |
| IY1449b ΔPP_0813 | JBx_273368 | IY1449b ΔPP_0813 | This work |
| IY1449b ΔPP_0814 | JBx_273369 | IY1449b ΔPP_0814 | This work |
| IY1449b ΔPP_0815 | JBx_273370 | IY1449b ΔPP_0815 | This work |
| IY1449b ΔPP_0812-15 | JBx_273371 | IY1449b ΔPP_0812-15 | This work |
| IY1449b ΔPP_1317 | JBx_273372 | IY1449b ΔPP_1317 | This work |
| IY1449b ΔPP_2136 | JBx_273373 | IY1449b ΔPP_2136 | This work |
| IY1449b ΔPP_4120 | JBx_273374 | IY1449b ΔPP_4120 | This work |
| IY1449b ΔPP_4189 | JBx_273375 | IY1449b ΔPP_4189 | This work |
| IY1449b ΔPP_4191 | JBx_273376 | IY1449b ΔPP_4191 | This work |
| IY1449b ΔPP_0751, ΔPP_0812 | JBx_273377 | IY1449b ΔPP_0751, ΔPP_0812 | This work |
| IY1449b ΔPP_0812, ΔPP_1317 | JBx_273378 | IY1449b ΔPP_0812, ΔPP_1317 | This work |
| IY1449b ΔPP_0812-15, ΔPP_1317 | JBx_273379 | IY1449b ΔPP_0812-15, ΔPP_1317 | This work |
| IY1449b ΔPP_0368, ΔPP_0812-15 | JBx_273380 | IY1449b ΔPP_0368, ΔPP_0812-15 | This work |
| IY1449b ΔPP_0751, ΔPP_0812-15 | JBx_273381 | IY1449b ΔPP_0751, ΔPP_0812-15 | This work |
| IY1449b ΔPP_0368, ΔPP_0812-15, ΔPP_1317 | JBx_273382 | IY1449b ΔPP_0368, ΔPP_0812-15, ΔPP_1317 | This work |
| IY1449b ΔPP_0368, ΔPP_0751, ΔPP_0812-15 | JBx_273383 | IY1449b ΔPP_0368, ΔPP_0751, ΔPP_0812-15 | This work |

# **Table S6:** List of *Pseudomonas putida* strains constructed in this study

# **Table S7:** ModelParamsTable; all parameters shown are ART defaults and any other parameters are sklearn/TPOT defaults.

| **Model** | **Model parameters** |
| --- | --- |
| Neural regressor | Max_iter = 10000  hidden_layer_sizes = (10,10,10) |
| Random forest regressor | N/A |
| Support vector regressor | N/A |
| Kernel ridge regressor | Alpha = 0.5  Gamma = 0.1 |
| K-nearest neighbor regressor | N_neighbors = 5 |
| Gaussian process regressor | kernel = RBF(  length_scale = 1.0,   length_scale_bounds = [1e-2, 1e2]  ) *  WhiteKernel(  noise_level = 1e-5,  noise_level_bounds = [1e-10, 1e10]  )  alpha = 1e-10  n_restarts_optimizer = 2  normalize_y = True |
| Gradient boosted regressor | N/A |
| TPOT | generations = 20  population_size = 20  use_dask = False |

# **Table S8:** Specific settings for selecting sgRNA combinations in each cycle.

| **Cycle** | **Total recommendations** | **2-sgRNA** | **3-sgRNA** | **4-sgRNA** | **# of occurrences of an sgRNA across all recommendations** (ex: PP_0815 can only occur 10 times in all recommendations) | **# of occurrences of an sgRNA across recommendations of a specific length** (ex: PP_0815 can only occur 5 times in all 2x sgRNA recommendations) |
| --- | --- | --- | --- | --- | --- | --- |
| 2 | 60 | 25 | 30 | 5 | 15 | N/A |
| 4 | 60 | 25 | 30 | 5 | 60 | N/A |
| 5 | 60 | 25 | 30 | 5 | 25 | 15 |
| 6 | 60 | 10 | 30 | 20 | 25 | N/A |

#

# **Table S9:** Cpf1-mediated ssDNA recombineering for gene knockouts in *P. putida*. Colonies were screened via check primers in Table S1.

| **Parent Strain** | **KO Target** | **RB-Tn Seq Data?** | **# Colonies** | **# Screened** | **# Success** | **Seq Verified?** |
| --- | --- | --- | --- | --- | --- | --- |
| IY1449b | PP_0368 | Y | 16 | 16 | 2 | Y |
| IY1449b | PP_0437 | N | 100 + | 42 | 0 | - |
| IY1449b | PP_0528 | N | 100 + | 42 | 0 | - |
| IY1449b | PP_0751 | N | 6 | 6 | 3 | Y |
| IY1449b | PP_0812 | N | 41 | 41 | 35 | Y |
| IY1449b | PP_1317 | Y | 6 | 6 | 2 | Y |
| IY1449b | PP_1506 | N | 100 + | 42 | 0 | - |
| IY1449b | PP_1769 | N | 5 | 5 | 0 | - |
| IY1449b | PP_2136 | Y | 17 | 17 | 10 | Y |
| IY1449b | PP_4120 | Y | 73 | 42 | 39 | Y |
| IY1449b | PP_4189 | N | 100 + | 42 | 9 | Y |
| IY1449b | PP_0812-15 | N | 24 | 24 | 0 | - |
| IY1449b | PP_4191 | N | 14 | 14 | 1 | Y |
| IY1449b | PP_0813 | N | 100+ | 42 | 32 | Y |
| IY1449b | PP_0814 | N | 100+ | 42 | 36 | Y |
| IY1449b | PP_0815 | N | 100+ | 42 | 42 | Y |
| IY1449b | PP_4192 | N | 100+ | 42 | 0 | - |
| IY1449b ΔPP_0751 | PP_0812 | - | 18 | 18 | 5 | Y |
| IY1449b ΔPP_0812 | PP_0813-15 | - | 100+ | 42 | 16 | Y |
| IY1449b ΔPP_4191 | PP_4192 | - | 0 | 0 | 0 | - |
| IY1449b ΔPP_0812-15 | PP_0368 | - | 30 | 30 | 16 | Y |
| IY1449b ΔPP_0812-15 | PP_0751 | - | 9 | 9 | 3 | Y |
| IY1449b ΔPP_0812-15, ΔPP_0368 | PP_0751 | - | 11 | 11 | 10 | Y |

[Bibliography](https://sciwheel.com/work/bibliography)

[1. Yunus, I. S. *et al.* Predictive genome-wide CRISPR-mediated gene downregulation for enhanced bioproduction. *bioRxiv* (2025).](https://sciwheel.com/work/bibliography/17798601)

[2. Banerjee, D. *et al.* Genome-scale and pathway engineering for the sustainable aviation fuel precursor isoprenol production in Pseudomonas putida. *Metab. Eng.* **82**, 157–170 (2024).](https://sciwheel.com/work/bibliography/16100003)

[3. Wannier, T. M. *et al.* Improved bacterial recombineering by parallelized protein discovery. *Proc Natl Acad Sci USA* **117**, 13689–13698 (2020).](https://sciwheel.com/work/bibliography/8992976)

[4. Czajka, J. J. *et al.* Tuning a high performing multiplexed-CRISPRi Pseudomonas putida strain to further enhance indigoidine production. *Metab. Eng. Commun.* **15**, e00206 (2022).](https://sciwheel.com/work/bibliography/13679626)
